# Supplementary material for: Alkylhalovinylboranes: a new class of Diels–Alder dienophiles
Source: Royal Society of Chemistry journal article supplement (doi:10.1039/c8ra07089j), 2018-01-01
Supplement: c8ra07089j1.pdf [file c8ra07089j1.pdf]

## Alkylhalovinylboranes: a new class of Diels-Alder dienophiles

Pablo L. Pisano and Silvina C. Pellegrinet\*

Instituto de Química Rosario (CONICET), Facultad de Ciencias Bioquímicas y Farmacéuticas, Universidad Nacional de Rosario, Suipacha 531, Rosario (2000), Argentina

### Supporting Information

List of contents:

- Experimental procedures. Pages S2-S7.
- $^1\text{H}$  and  $^{13}\text{C}$  NMR spectra for compounds **13-15**. Pages S8-S10.
- Computational methods. Pages S11-S12.
- Coefficients, shapes and energies of the FMOs of the reactants (Figure S1). Pages S13-S14.
- Global and local reactivity indices of the reactants (Tables S1-S2). Page S15.
- Global electron density transfer (GEDT) for TSs (Table S3). Page S16.
- Optimized geometries of transition structures not included in the paper. Pages S17-S18.
- Cartesian coordinates, absolute energies including zero-point energy corrections, free energies (in Hartrees) and number of imaginary frequencies of all the stationary points reported in the paper; values of imaginary frequencies of all transition structures. Pages S19-S69.

## Experimental procedures

General experimental procedures. All non-aqueous reactions were performed in oven dried glassware, under an inert atmosphere of dry nitrogen or high purity argon. All reagents and solvents were used directly as purchased or purified according to standard procedures. Analytical thin layer chromatography was carried out using commercial silica gel plates (Merck, Silica Gel 60 F254) and visualization was effected with a *p*-anisaldehyde solution (2.5 mL *p*-anisaldehyde + 2.5 mL H<sub>2</sub>SO<sub>4</sub> + 0.25 mL AcOH + 95 mL EtOH). Column chromatography was performed with silica gel 60 H (Merck), slurry packed, run under low pressure of nitrogen. The Diels-Alder reactions were monitored using <sup>11</sup>B NMR analysis in anhydrous CDCl<sub>3</sub>. NMR spectra were recorded at 300 MHz for <sup>1</sup>H, 75 MHz for <sup>13</sup>C and 96 MHz for <sup>11</sup>B on a Bruker Avance-300 DPX spectrometer with CDCl<sub>3</sub> as solvent and (CH<sub>3</sub>)<sub>4</sub>Si (<sup>1</sup>H, 0.00 ppm) and CDCl<sub>3</sub> (<sup>13</sup>C, 76.9 ppm) as internal standards. <sup>11</sup>B NMR spectra were externally referenced to BF<sub>3</sub>·Et<sub>2</sub>O (<sup>11</sup>B, 0.00 ppm). Diastereomeric ratios were determined by <sup>1</sup>H NMR integration. Due to the volatility of the 5-norbornen-2-ol (**9**), yields were determined by <sup>1</sup>H NMR using  $\alpha$ -naphthol as internal standard. Chemical shifts are reported in delta ( $\delta$ ) units in parts per million (ppm) and splitting patterns are designated as s, singlet; d, doublet; t, triplet; q, quartet; m, multiplet and br, broad. Coupling constants are recorded in Hertz (Hz). Infrared spectra were recorded on a Shimadzu IR Prestige-21 spectrometer using sodium chloride plates. Absorbance frequencies are recorded in reciprocal centimeters (cm<sup>-1</sup>). Low resolution mass spectra (MS) were obtained using a Shimadzu GCMS-QP2010 plus spectrometer.

### General procedures for the terpenes reactions under inert atmosphere

#### Method A (BCl<sub>3</sub>)

In a dry Schlenk reaction tube, under an argon atmosphere and magnetic stirring, a 1M solution of BCl<sub>3</sub> in hexanes (1 mL, 1 mmol), Et<sub>3</sub>SiH (160  $\mu$ L, 1 mmol) and the terpene (1.1 mmol) were added on an ice-brine bath at -10 °C allowing to reach room temperature. After 1 h, the reaction mixture was cooled to 0 °C and tributylvinylstannane (301  $\mu$ L, 1 mmol) and cyclopentadiene (411  $\mu$ L, 5 mmol) were added maintaining the stirring for 3 h allowing to reach room temperature. After that time, the reaction mixture was cooled to 0 °C and THF (3 mL), Et<sub>3</sub>N (1 mL) were added. Finally, a 3N solution of NaOH (3 mL) and 30% H<sub>2</sub>O<sub>2</sub> (3 mL) were added in fractions of 0.5 mL alternately, leaving the reaction mixture with stirring at room temperature for 15 h. The organic phase was extracted with Et<sub>2</sub>O (3 x 15 mL), washed

with saturated aqueous solutions of KF (15 mL), NH<sub>4</sub>Cl (15 mL) and NaCl (15 mL) and dried over Na<sub>2</sub>SO<sub>4</sub>. The solvent was evaporated under reduced pressure at 0 °C and the crude reaction was purified by column chromatography (pentane with gradient of Et<sub>2</sub>O) to obtain 5-norbornen-2-ol (**9**).

#### Vinylborane **16'a**

According to Method A, when (+)- $\alpha$ -pinene (175  $\mu$ L, 1.1 mmol) was used, the compound **9** was obtained with a 51% yield (56.3 mg, *endo/exo* 80:20, *endo R/S* 53:47 and *exo R/S* 50:50).

#### Vinylborane **17a**

According to Method A, when (+)-2-carene (179  $\mu$ L, 1.1 mmol) was used, the compound **9** was obtained with a 34% yield (37.2 mg, *endo/exo* 76:24, *endo R/S* 30:70 and *exo R/S* 48:52).

#### Vinylborane **18a**

According to Method A, when (+)-3-carene (175  $\mu$ L, 1.1 mmol) was used, the compound **9** was obtained with a 54% yield (59.6 mg, *endo/exo* 79:21, *endo R/S* 62:38 and *exo R/S* 48:52).

#### Vinylborane **19a**

According to Method A, when (-)-myrtenol (185  $\mu$ L, 1.1 mmol) was used, the compound **9** was obtained with a 21% yield (22.9 mg, *endo/exo* 76:24, *endo R/S* 48:52 and *exo R/S* 50:50).

#### Vinylborane **20a**

According to Method A, when the compound **13** (205  $\mu$ L, 1.1 mmol) was used, the compound **9** was obtained with a 27% yield (30.0 mg, *endo/exo* 78:22, *endo R/S* 47:53 and *exo R/S* 44:56).

#### Vinylborane **21a**

According to Method A, when the compound **14** (230  $\mu$ L, 1.1 mmol) was used, the compound **9** was obtained with a 24% yield (26.4 mg, *endo/exo* 79:21, *endo R/S* 45:55 and *exo R/S* 45:55).

#### Vinylborane **22a**

According to Method A, when the compound **15** (180  $\mu$ L, 1.1 mmol) was used, the compound **9** was obtained with a 26% yield (28.6 mg, *endo/exo* 78:22, *endo R/S* 47:53 and *exo R/S* 50:50).

#### Vinylborane **23a**

According to Method A, when (+)-longifolene (240  $\mu$ L, 1.1 mmol) was used, the compound **9** was obtained with a 42% yield (46.6 mg, *endo/exo* 79:21, *endo R/S* 44:56 and *exo R/S* 50:50).

#### Vinylborane **24a**

According to Method A, when (-)-camphene (176  $\mu$ L, 1.1 mmol) was used, the compound **9** was obtained with a 41% yield (44.8 mg, *endo/exo* 78:22, *endo R/S* 48:52 and *exo R/S* 52:48).

### Method B (BBr<sub>3</sub>)

In a dry Schlenk reaction tube, under an argon atmosphere and magnetic stirring, CH<sub>2</sub>Cl<sub>2</sub> (1 mL), BBr<sub>3</sub> (95 μL, 1 mmol), Et<sub>3</sub>SiH (160 μL, 1 mmol) and the terpene (1.1 mmol) were added on a ethyl acetate bath cooled with N<sub>2</sub> liquid at -40 °C allowing to reach room temperature. After 2 h, the reaction mixture was cooled to 0 °C and tributylvinylstannane (301 μL, 1 mmol) and cyclopentadiene (411 μL, 5 mmol) were added maintaining the stirring for 5 h allowing to reach room temperature. After that time, the reaction mixture was cooled to 0 °C and THF (3 mL), Et<sub>3</sub>N (1 mL) were added. Finally, a 3N solution of NaOH (3 mL) and 30% H<sub>2</sub>O<sub>2</sub> (3 mL) were added in fractions of 0.5 mL alternately, leaving the reaction mixture with stirring at room temperature for 15 h. The organic phase was extracted with Et<sub>2</sub>O (3 x 15 mL), washed with saturated aqueous solutions of KF (15 mL), NH<sub>4</sub>Cl (15 mL) and NaCl (15 mL) and dried over Na<sub>2</sub>SO<sub>4</sub>. The solvent was evaporated under reduced pressure at 0 °C and the crude reaction was purified by column chromatography (pentane with gradient of Et<sub>2</sub>O) to obtain 5-norbornen-2-ol (**9**).

#### Vinylborane **16'b**

According to Method B, when (+)- $\alpha$ -pinene (175 μL, 1.1 mmol) was used, the compound **9** was obtained with a 36% yield (39.3 mg, *endo/exo* 90:10, *endo R/S* 50:50 and *exo R/S* 50:50).

#### Vinylborane **17b**

According to Method B, when (+)-2-carene (179 μL, 1.1 mmol) was used, the compound **9** was obtained with a 35% yield (38.6 mg, *endo/exo* 91:9, *endo R/S* 49:51 and *exo R/S* 50:50).

#### Vinylborane **18b**

According to Method B, when (+)-3-carene (175 μL, 1.1 mmol) was used, the compound **9** was obtained with a 32% yield (35.3 mg, *endo/exo* 93:7, *endo R/S* 48:52 and *exo R/S* 50:50).

#### Vinylborane **20b**

According to Method B, when the compound **13** (205 μL, 1.1 mmol) was used, the compound **9** was obtained with a 27% yield (29.8 mg, *endo/exo* 86:14, *endo R/S* 48:52 and *exo R/S* 50:50).

#### Vinylborane **22b**

According to Method B, when the compound **15** (180 μL, 1.1 mmol) was used, the compound **9** was obtained with a 30% yield (33.2 mg, *endo/exo* 96:4, *endo R/S* 45:55 and *exo R/S* 50:50).

#### Vinylborane **23b**

According to Method B, when (+)-longifolene (240 μL, 1.1 mmol) was used, the compound **9** was obtained with a 32% yield (35.1 mg, *endo/exo* 91:9, *endo R/S* 47:53 and *exo R/S* 50:50).

### Vinylborane **24b**

According to Method B, when (-)-camphene (176 mg, 1.1 mmol) was used, the compound **9** was obtained with a 28% yield (30.7 mg, *endo/exo* 93:7, *endo R/S* 50:50 and *exo R/S* 50:50).

### Method C (HBBr<sub>2</sub>·SMe<sub>2</sub>)

In a dry Schlenk reaction tube, under an argon atmosphere and magnetic stirring, a 1M solution of HBBr<sub>2</sub>·SMe<sub>2</sub> in CH<sub>2</sub>Cl<sub>2</sub> (1 mL, 1 mmol) and the terpene (1.1 mmol) were added on an ice-brine bath at -10 °C, leading the reaction mixture to reflux (ca. 50 °C) for 2 h. After that time, the reaction mixture was cooled to 0 °C and tributylvinylstannane (301 μL, 1 mmol) and cyclopentadiene (411 μL, 5 mmol) were added leading the reaction mixture to reflux (ca. 50 °C) for 5 h. Subsequently, the reaction mixture was allowed to reach room temperature maintaining the stirring for 15 h. After that time, the reaction mixture was cooled to 0 °C and THF (3 mL), Et<sub>3</sub>N (1 mL) were added. Finally, a 3N solution of NaOH (3 mL) and 30% H<sub>2</sub>O<sub>2</sub> (3 mL) were added in fractions of 0.5 mL alternately, leaving the reaction mixture with stirring at room temperature for 4 h. The organic phase was extracted with Et<sub>2</sub>O (3 x 15 mL), washed with saturated aqueous solutions of KF (15 mL), NH<sub>4</sub>Cl (15 mL) and NaCl (15 mL) and dried over Na<sub>2</sub>SO<sub>4</sub>. The solvent was evaporated under reduced pressure at 0 °C and the crude reaction was purified by column chromatography (pentane with gradient of Et<sub>2</sub>O) to obtain 5-norbornen-2-ol (**9**).

### Vinylborane **17b**

According to Method C, when (+)-2-carene (179 μL, 1.1 mmol) was used, the compound **9** was obtained with a 10% yield (10.5 mg, *endo/exo* 60:40, *endo R/S* 45:55 and *exo R/S* 50:50).

### Vinylborane **18b**

According to Method C, when (+)-3-carene (175 μL, 1.1 mmol) was used, the compound **9** was obtained with a 23% yield (24.7 mg, *endo/exo* 74:26, *endo R/S* 50:50 and *exo R/S* 49:51).

### (1*R*,5*S*)-2-((benzyloxy)methyl)-6,6-dimethylbicyclo-[3.1.1]-hept-2-ene (**13**)<sup>1</sup>

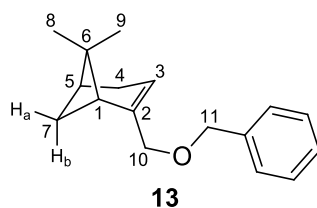

<sup>1</sup> Hwu, J. R.; Chua, V.; Schroeder, J. E.; Barrans Jr., R. E.; Khoudary, K. P.; Wang, N.; Wetzel, J. M. *J. Org. Chem.* **1986**, *51*, 4731-4733.

A dispersion of NaH (42%, 1.14 g, 20 mmol) in mineral oil was washed with anhydrous hexane (20 mL) and THF (25 mL) was added on an ice-water bath. A solution of (–)-myrtenol (1.68 mL, 10 mmol) in anhydrous THF (25 mL) was added to the dispersion of NaH, maintaining the reaction mixture with stirring at 0 °C for 1 h. Subsequently, benzyl bromide (2.38 mL, 20 mmol) was added dropwise maintaining the reaction mixture at 0 °C for 1.5 h. After that time, a saturated aqueous solution of NH<sub>4</sub>Cl was added until the reaction mixture was neutralized. The organic phase was extracted with Et<sub>2</sub>O (3 x 40 mL), washed with brine (40 mL), and dried over Na<sub>2</sub>SO<sub>4</sub>. The solvent was evaporated under reduced pressure and the crude reaction was purified by column chromatography (hexane) to obtain the compound **13** (242 mg, 99%). IR (film)  $\nu_{\text{max}}$  (cm<sup>-1</sup>): 3088, 3063, 3030, 2982, 2868, 1722, 1703, 1682, 1497, 1456, 1366, 1092, 1070, 1028, 735, 696. <sup>1</sup>H NMR (300 MHz; CDCl<sub>3</sub>)  $\delta$ : 7.42-7.18 (m, 5H, ArH), 5.56-5.47 (m, 1H, H-3), 4.46 (sa, 2H, H-11), 3.88 (sa, 2H, H-10), 2.41 (ddd,  $J_{7a,7b}$  = 8.6 and  $J_{1,7a}$  =  $J_{5,7a}$  = 5.6 Hz, 1H, H-7a), 2.34-2.24 (m, 2H, H-4), 2.24-2.17 (m, 1H, H-1), 2.15-2.06 (m, 1H, H-5), 1.29 (s, 3H, H-8), 1.20 (d, 1H,  $J_{7a,7b}$  = 8.6 Hz, H-7b), 0.86 (s, 3H, H-9). <sup>13</sup>C NMR (75 MHz; CDCl<sub>3</sub>)  $\delta$ : 145.2 (C, C-2), 138.5 (C, Ar), 128.1 (CH x 2, Ar), 127.5 (CH x 2, Ar), 127.3 (CH, Ar), 119.9 (CH, C-3), 72.9 (CH<sub>2</sub>, C-10), 71.5 (CH<sub>2</sub>, C-11), 43.2 (CH, C-1), 40.8 (CH, C-5), 37.9 (C, C-6), 31.4 (CH<sub>2</sub>, C-7), 31.1 (CH<sub>2</sub>, C-4), 26.1 (CH<sub>3</sub>, C-8), 21.0 (CH<sub>3</sub>, C-9). MS-EI  $m/z$  (%): 242 (0.1), 169 (0.5), 151 (0.6), 119 (12.7), 91 (100), 65 (12.1), 41 (11.5).

**(1R,5S)-2-(iodomethyl)-6,6-dimethylbicyclo-[3.1.1]-hept-2-ene (14)**

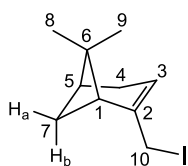

**14**

To a solution of triphenylphosphine (1.38 g, 5 mmol) and imidazole (0.92 g, 13.4 mmol) in dry CH<sub>2</sub>Cl<sub>2</sub> (30 mL) on an ic

e-water bath, iodine (1.27 g, 5 mmol) was added and the mixture was stirred at 0 °C for 10 minutes under argon. After that time, (–)-myrtenol (0.42 mL, 2.5 mmol) was added maintaining the reaction mixture with stirring at 0 °C for 5 min. The solvent was evaporated under reduced pressure at 0 °C and the crude reaction was purified immediately by column chromatography (pentane with gradient of Et<sub>2</sub>O) to obtain the compound **14** (592 mg, 90%).

IR (film)  $\nu_{\max}$  (cm<sup>-1</sup>): 3022, 2982, 2918, 2884, 2828, 1636, 1468, 1425, 1366, 1146. <sup>1</sup>H NMR (300 MHz; CDCl<sub>3</sub>)  $\delta$ : 5.71 (sa, 1H, H-3), 3.95-3.86 (m, 2H, H-10), 2.45 (ddd,  $J_{7a,7b}$  = 8.7 and  $J_{1,7a}$  =  $J_{5,7a}$  = 5.6 Hz, 1H, H-7a), 2.30-2.03 (m, 4H, H-1, H-4 and H-5), 1.31 (s, 3H, H-8), 1.16 (d, 1H,  $J_{7a,7b}$  = 8.7 Hz, H-7b), 0.81 (s, 3H, H-9). <sup>13</sup>C NMR (75 MHz; CDCl<sub>3</sub>)  $\delta$ : 144.7 (C, C-2), 121.6 (CH, C-3), 45.6 (CH, C-1), 40.2 (CH, C-5), 37.8 (C, C-6), 31.5 (CH<sub>2</sub>, C-7), 31.2 (CH<sub>2</sub>, C-4), 25.9 (CH<sub>3</sub>, C-8), 20.9 (CH<sub>3</sub>, C-9), 13.0 (CH<sub>2</sub>, C-10). MS-EI m/z (%): 263 (100), 207 (77.7), 135 (62.6), 107 (36.5), 93 (79.6), 69 (85.2), 41 (70.3).

**(1R,5S)-2-benzyl-6,6-dimethylbicyclo-[3.1.1]-hept-2-ene (15)<sup>2</sup>**

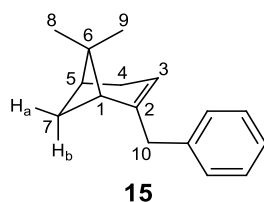

To a suspension of magnesium turnings (162 mg, 6.7 mmol) in anhydrous Et<sub>2</sub>O (3 mL) on an ice-water bath, bromobenzene (702  $\mu$ L, 6.7 mmol) was added dropwise maintaining the stirring at room temperature for 1 h. After that time, the reaction mixture was transferred by cannula to a solution of compound **14** (1.05 g, 4 mmol) in anhydrous Et<sub>2</sub>O (3 mL) on an ice-water bath maintaining the stirring at room temperature for 2.5 h. Subsequently, a saturated aqueous solution of NH<sub>4</sub>Cl (5 mL) was added. The organic phase was extracted with Et<sub>2</sub>O (3 x 10 mL), washed with brine (10 mL), and dried over Na<sub>2</sub>SO<sub>4</sub>. The solvent was evaporated under reduced pressure and the crude reaction was purified by column chromatography (hexane) to obtain the compound **15** (820 mg, 86%). IR (film)  $\nu_{\max}$  (cm<sup>-1</sup>): 3082, 3061, 3026, 2984, 2913, 2832, 1601, 1493, 1452, 1364, 745, 700. <sup>1</sup>H NMR (300 MHz; CDCl<sub>3</sub>)  $\delta$ : 7.30-7.10 (m, 5H, ArH); 5.27-5.18 (m, 1H, H-3); 3.36-3.18 (m, 2H, H-10); 2.36-2.13 (m, 3H, H-7a, H-4); 2.11-2.01 (m, 1H, H-5); 2.01-1.94 (m, 1H, H-1); 1.19 (s, 3H, H-8); 1.15 (d, 1H,  $J_{7a,7b}$  = 8.5 Hz, H-7b); 0.74 (s, 3H, H-9). <sup>13</sup>C NMR (75 MHz; CDCl<sub>3</sub>)  $\delta$ : 147.2 (C, C-2); 139.4 (C, Ar); 129.1 (CH x 2, Ar); 127.9 (CH x 2, Ar); 125.7 (CH, Ar); 117.6 (CH, C-3); 45.4 (CH, C-1); 43.4 (CH<sub>2</sub>, C-10); 40.6 (CH, C-5); 37.8 (C, C-6); 31.7 (CH<sub>2</sub>, C-7); 31.3 (CH<sub>2</sub>, C-4); 26.1 (CH<sub>3</sub>, C-8); 20.9 (CH<sub>3</sub>, C-9). MS-EI m/z (%): 210 (3.5), 168 (22.1), 121 (11.6), 91 (100), 65 (10.4), 41 (9.8).

<sup>2</sup> (a) Grigg, R.; Stevenson, P.; Worakun, T. *Tetrahedron* **1988**, *44*, 2033-2048. (b) Bir, G.; Kaufmann, D. *J. Organomet. Chem.* **1990**, *390*, 1-6.

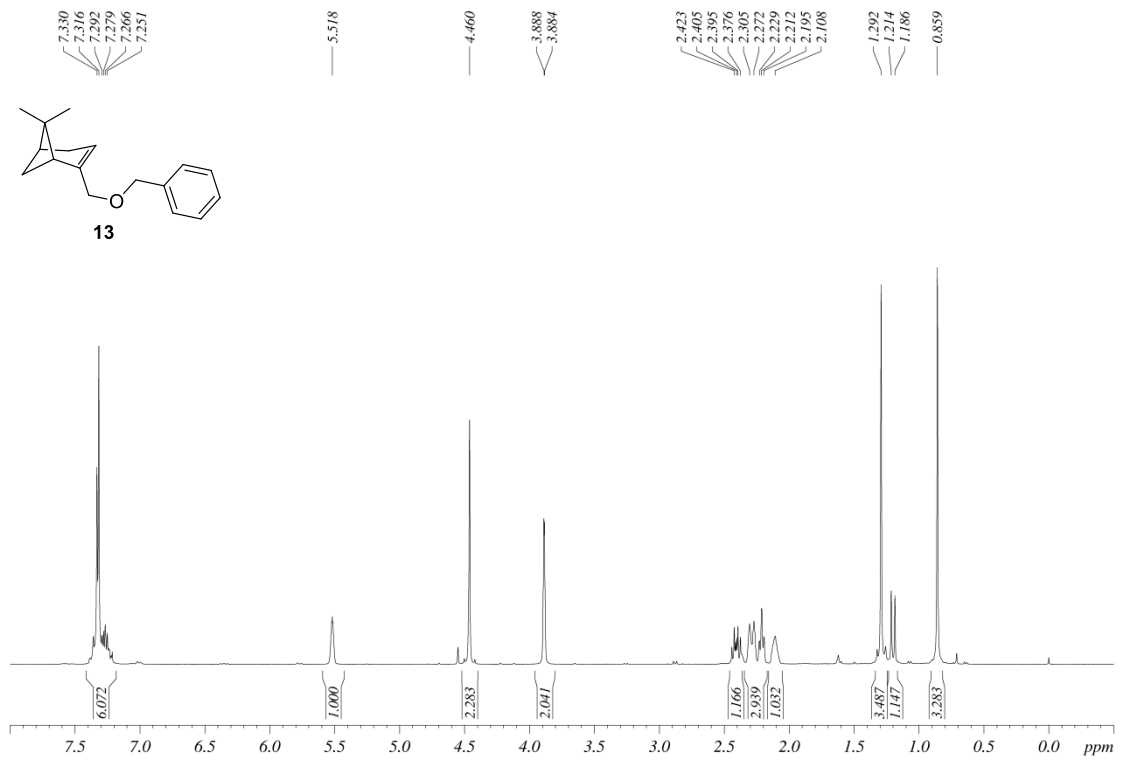

$^1\text{H}$  NMR spectrum of **13**.

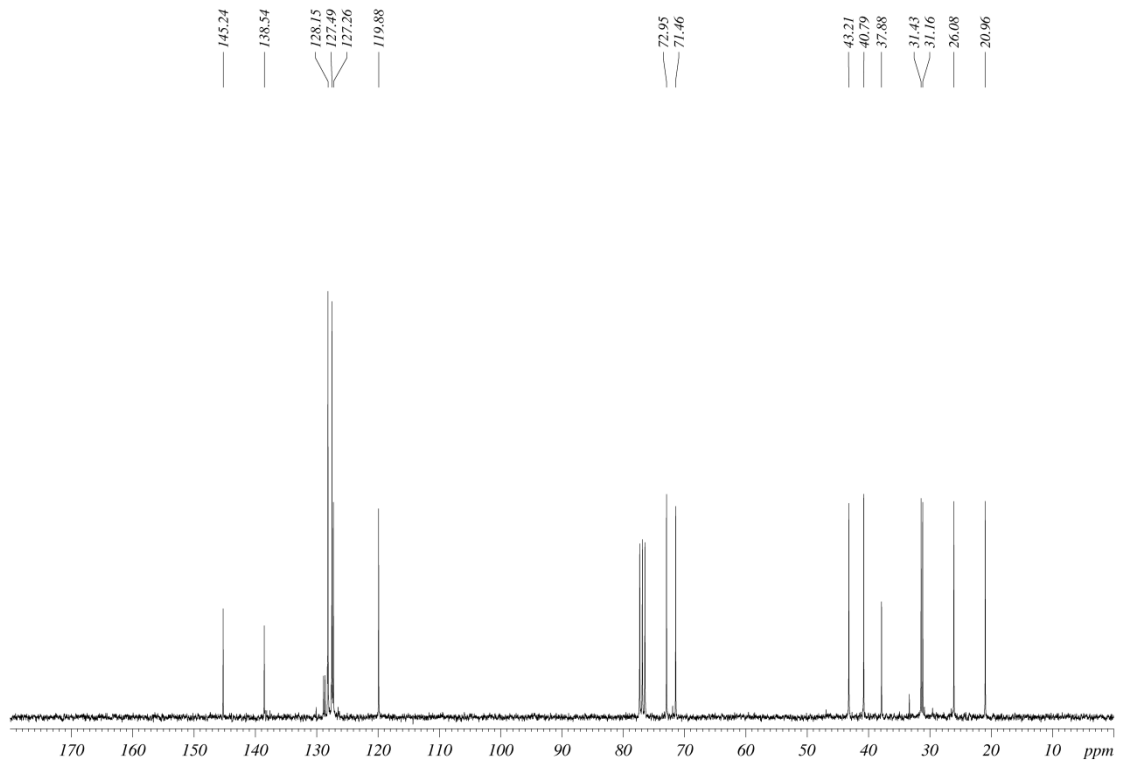

$^{13}\text{C}$  NMR spectrum of **13**.



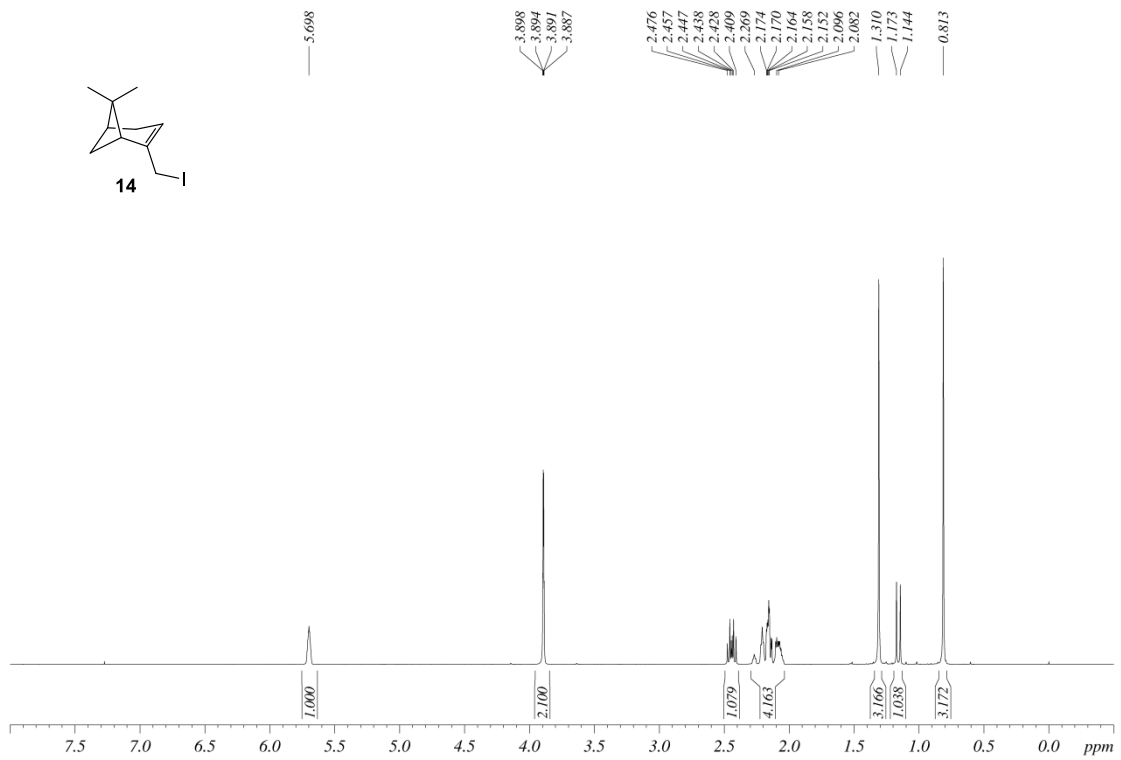

<sup>1</sup>H NMR spectrum of **14**.

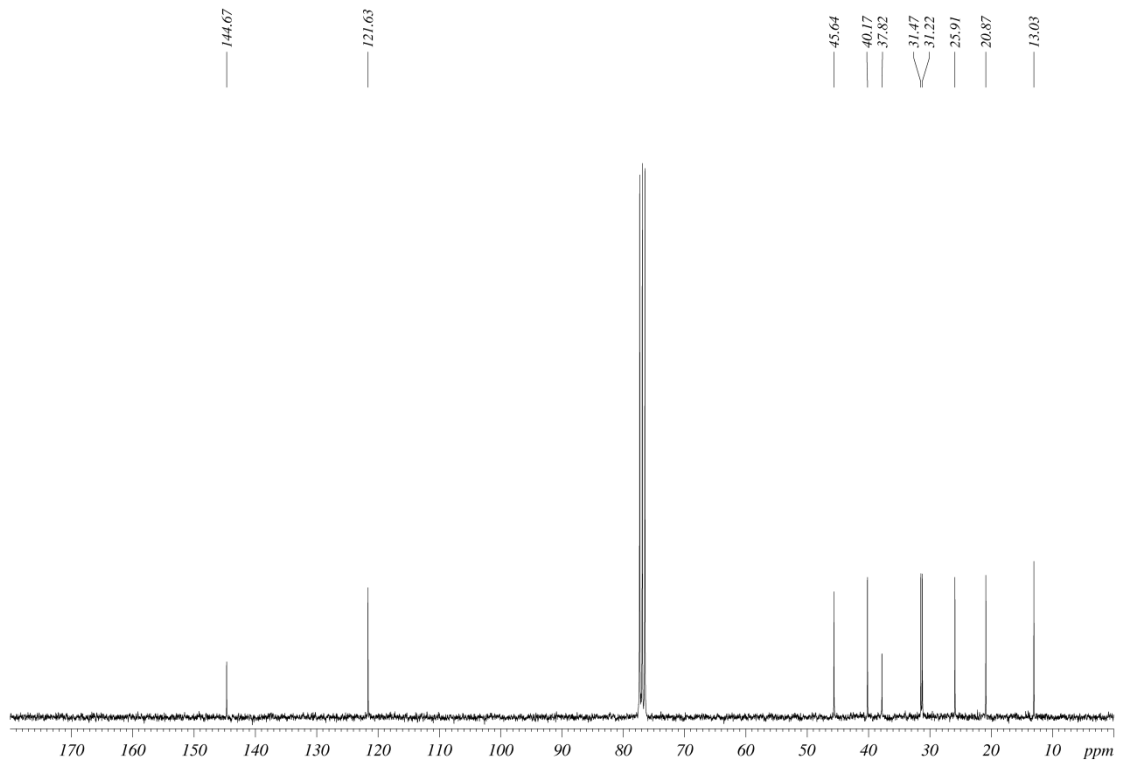

<sup>13</sup>C NMR spectrum of **14**.

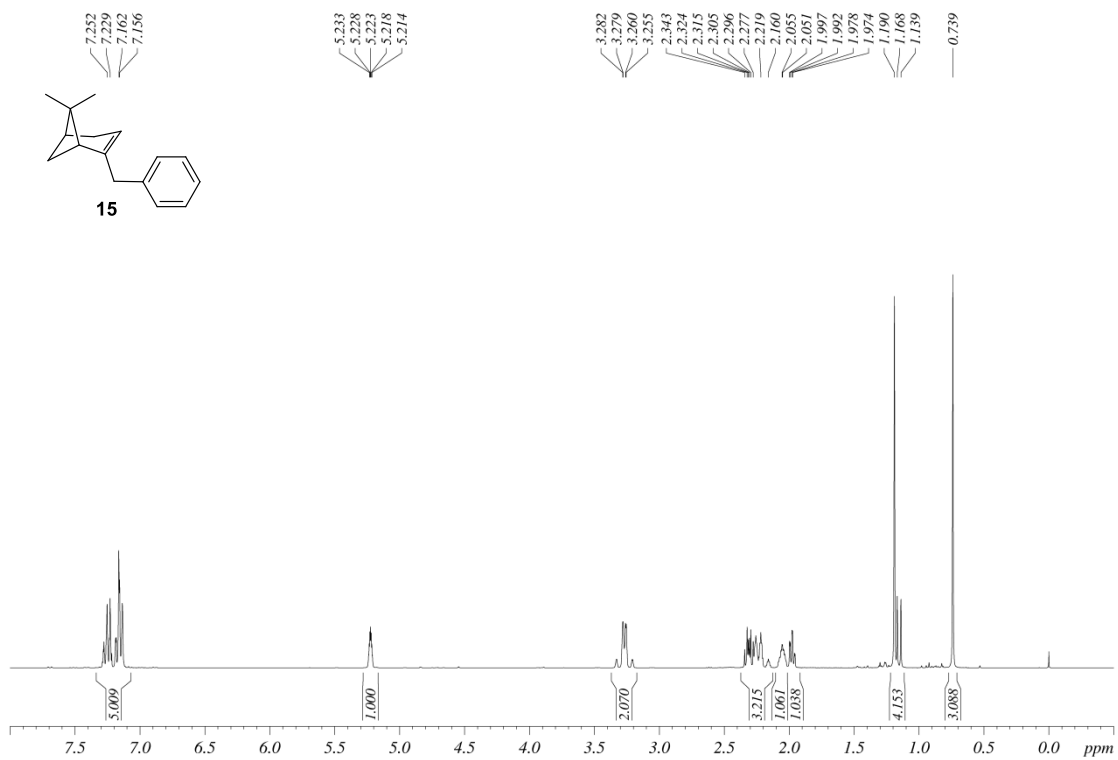

<sup>1</sup>H NMR spectrum of **15**.

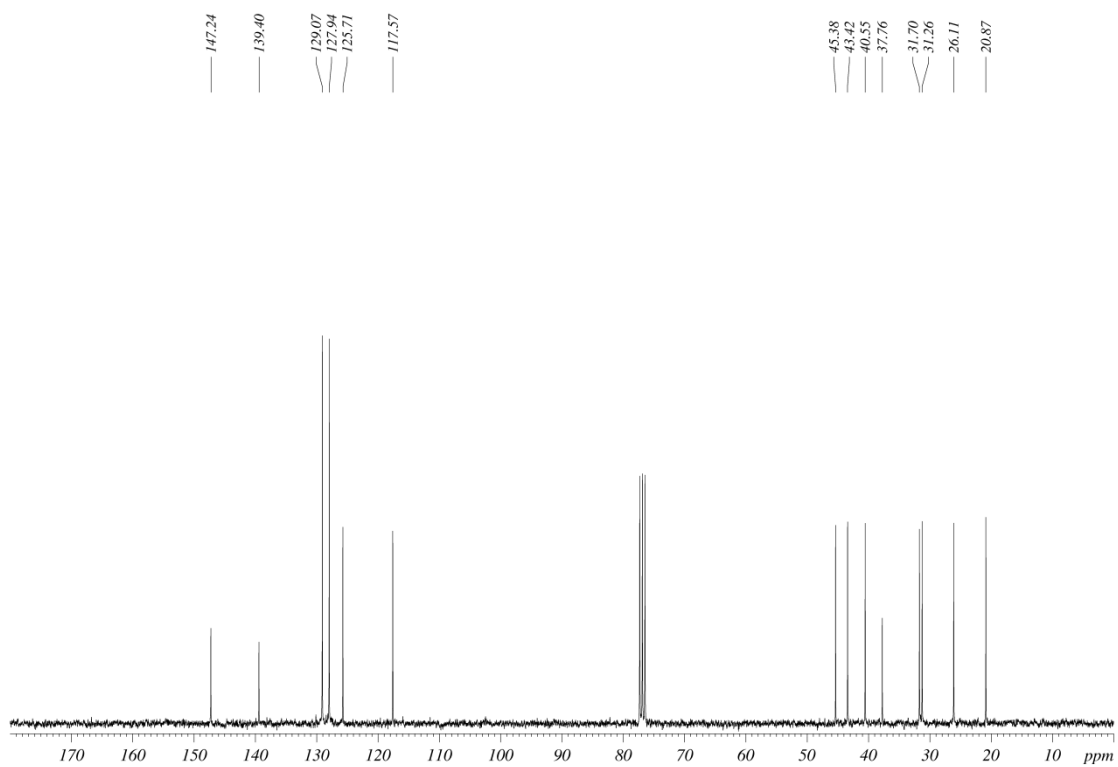

<sup>13</sup>C NMR spectrum of **15**.

## Computational methods

Conformational searches for the reactants, the transition structures (TSs), and the products were run to locate the global minima at the B3LYP/6-31G\* level of theory. Initially, a large number of geometries were generated using the conformational search module of Hyperchem with the MM+ method.<sup>3</sup> In the TSs optimizations, the carbon atoms corresponding to the carbon-carbon new bonds formed in the Diels-Alder reaction were fixed during the conformational searches, optimizing the spatial location of the remaining atoms. All selected structures were then successively reoptimized at the RHF/AM1, RHF/3-21G and B3LYP/6-31G\* levels of theory (except for compound **21a**, where LANL2DZ<sup>4</sup> was used as the final level of theory).<sup>5</sup> Additionally, solvent effects in dichloromethane ( $\epsilon = 8.93$ ) and heptane ( $\epsilon = 1.92$ ) were calculated for the most stable geometries of reagents, TSs, and products using the Polarized Continuum Model of Self-Consistent Reaction Field method (PCM method).<sup>6</sup> Geometries for all structures were fully optimized and normal mode analysis was used to confirm the nature of the stationary points and to evaluate the thermochemical properties. Reported thermochemical properties include zero-point energies (ZPEs) without scaling and were calculated at 1 atm and 298.15 K. The molecular orbitals of the reactants were calculated to analyse the frontier orbital interactions. Intrinsic reaction coordinate (IRCs) calculations were run to verify the connectivity between reactants, TSs and products. To examine the more important interactions in the TSs, we performed natural bond orbital calculations and Wiberg bond indexes (WBIs) were analysed. *Endo/exo* and *Re/Si* ratios were computed using Boltzmann factors based on free energies of activation ( $\Delta G^\ddagger$ ). The global electrophilicity index  $\omega$  has been given by the following expression,  $\omega = \mu^2/2\eta$  (eV), in terms of the electronic chemical potential  $\mu$  and the chemical hardness  $\eta$ . Both quantities may be approached in terms of the one-electron energies of the frontier molecular orbitals HOMO and LUMO,  $\mu \approx (E_{\text{HOMO}} + E_{\text{LUMO}})/2$  and  $\eta \approx (E_{\text{LUMO}} - E_{\text{HOMO}})$ , respectively. The global nucleophilicity index,  $N$ , was computed as  $N = E_{\text{HOMO}(\text{diene})} - E_{\text{HOMO}(\text{TCNE})}$  (eV), where TCNE accounts for tetracyanoethylene. The local electrophilic indices,  $\omega_k$ , were computed according to the

<sup>3</sup> Hyperchem Professional Release 7.52, Hypercube, Inc., 2005.

<sup>4</sup> P. J. Hay and W. R. Wadt, *J. Chem. Phys.*, 1985, **82**, 299-310.

<sup>5</sup> Gaussian 09W, Revision D.01: M. J. Frisch, G. W. Trucks, H. B. Schlegel, G. E. Scuseria, M. A. Robb, J. R. Cheeseman, G. Scalmani, V. Barone, B. Mennucci, G. A. Petersson, H. Nakatsuji, M. Caricato, X. Li, H. P. Hratchian, A. F. Izmaylov, J. Bloino, G. Zheng, J. L. Sonnenberg, M. Hada, M. Ehara, K. Toyota, R. Fukuda, J. Hasegawa, M. Ishida, T. Nakajima, Y. Honda, O. Kitao, H. Nakai, T. Vreven, J. A. Montgomery, Jr., J. E. Peralta, F. Ogliaro, M. Bearpark, J. J. Heyd, E. Brothers, K. N. Kudin, V. N. Staroverov, T. Keith, R. Kobayashi, J. Normand, K. Raghavachari, A. Rendell, J. C. Burant, S. S. Iyengar, J. Tomasi, M. Cossi, N. Rega, J. M. Millam, M. Klene, J. E. Knox, J. B. Cross, V. Bakken, C. Adamo, J. Jaramillo, R. Gomperts, R. E. Stratmann, O. Yazyev, A. J. Austin, R. Cammi, C. Pomelli, J. W. Ochterski, R. L. Martin, K. Morokuma, V. G. Zakrzewski, G. A. Voth, P. Salvador, J. J. Dannenberg, S. Dapprich, A. D. Daniels, O. Farkas, J. B. Foresman, J. V. Ortiz, J. Cioslowski, and D. J. Fox, Gaussian, Inc., Wallingford CT, 2013.

<sup>6</sup> J. Tomasi, B. Mennucci and R. Cammi, *Chem. Rev.*, 2005, **105**, 2999-3094.

following expression:  $\omega_k = \omega \cdot P_k^+$ , where  $P_k^+$  is the electrophilic Parr function of atom k, that was computed using the Mulliken atomic spin density (ASD) computed by single-point UB3LYP/6-31G\* level of the anion resulting from adding one electron to the optimized neutral B3LYP/6-31G\* geometry.<sup>7</sup> In addition, global electron density transfer (GEDT) for the TSs were calculated.<sup>8</sup>

---

<sup>7</sup> L. R. Domingo, P. Pérez and J. A. Sáez, *RSC Advances*, 2013, **3**, 1486-1494.

<sup>8</sup> L. R. Domingo, *RSC Advances*, 2014, **4**, 32415-32428.

## Coefficients of FMOs of reactants

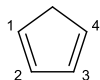

|      | E (eV) | C-1   |       | C-2   |       | C-3   |       | C-4  |      |
|------|--------|-------|-------|-------|-------|-------|-------|------|------|
|      |        | 2pz   | 3pz   | 2pz   | 3pz   | 2pz   | 3pz   | 2pz  | 3pz  |
| HOMO | -5.76  | -0.35 | -0.28 | -0.24 | -0.18 | 0.24  | 0.18  | 0.35 | 0.28 |
| LUMO | -0.27  | 0.34  | 0.42  | -0.24 | -0.30 | -0.24 | -0.30 | 0.34 | 0.42 |

|        | E (eV) | C-1   |       | C-2  |      | B     |       |
|--------|--------|-------|-------|------|------|-------|-------|
|        |        | 2pz   | 3pz   | 2pz  | 3pz  | 2pz   | 3pz   |
| HOMO-3 | -7.83  | 0.35  | 0.24  | 0.36 | 0.26 | 0.01  | 0.02  |
| LUMO   | -1.78  | -0.17 | -0.21 | 0.37 | 0.42 | -0.39 | -0.40 |

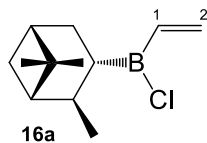

|        | E (eV) | C-1   |       | C-2   |       | B     |       |
|--------|--------|-------|-------|-------|-------|-------|-------|
|        |        | 2pz   | 3pz   | 2pz   | 3pz   | 2pz   | 3pz   |
| HOMO-3 | -7.63  | -0.23 | -0.15 | -0.25 | -0.18 | -0.01 | -0.01 |
| LUMO   | -1.83  | -0.17 | -0.21 | 0.36  | 0.42  | -0.39 | -0.38 |

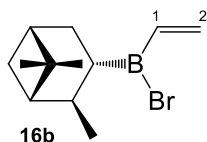

|        | E (eV) | C-1   |       | C-2  |      | B     |       |
|--------|--------|-------|-------|------|------|-------|-------|
|        |        | 2pz   | 3pz   | 2pz  | 3pz  | 2pz   | 3pz   |
| HOMO-2 | -7.74  | 0.34  | 0.23  | 0.35 | 0.25 | 0.05  | 0.03  |
| LUMO   | -1.72  | -0.18 | -0.22 | 0.37 | 0.43 | -0.39 | -0.39 |

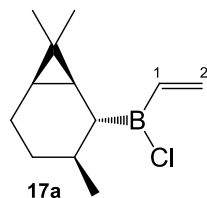

|        | E (eV) | C-1   |       | C-2   |       | B     |       |
|--------|--------|-------|-------|-------|-------|-------|-------|
|        |        | 2pz   | 3pz   | 2pz   | 3pz   | 2pz   | 3pz   |
| HOMO-3 | -7.57  | -0.29 | -0.20 | -0.31 | -0.23 | 0.00  | 0.00  |
| LUMO   | -1.78  | -0.17 | -0.22 | 0.36  | 0.42  | -0.40 | -0.37 |

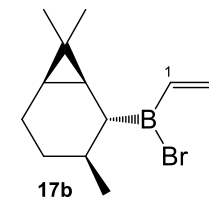

|        | E (eV) | C-1   |       | C-2  |      | B     |       |
|--------|--------|-------|-------|------|------|-------|-------|
|        |        | 2pz   | 3pz   | 2pz  | 3pz  | 2pz   | 3pz   |
| HOMO-3 | -7.79  | 0.36  | 0.24  | 0.37 | 0.26 | 0.06  | 0.04  |
| LUMO   | -1.77  | -0.18 | -0.21 | 0.37 | 0.42 | -0.39 | -0.39 |

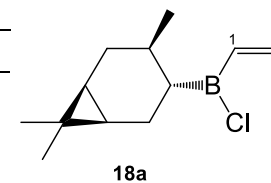

|        | E (eV) | C-1   |       | C-2   |       | B     |       |
|--------|--------|-------|-------|-------|-------|-------|-------|
|        |        | 2pz   | 3pz   | 2pz   | 3pz   | 2pz   | 3pz   |
| HOMO-3 | -7.60  | -0.29 | -0.19 | -0.31 | -0.23 | 0.01  | 0.01  |
| LUMO   | -1.83  | -0.17 | -0.21 | 0.36  | 0.42  | -0.40 | -0.37 |

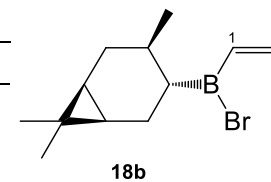

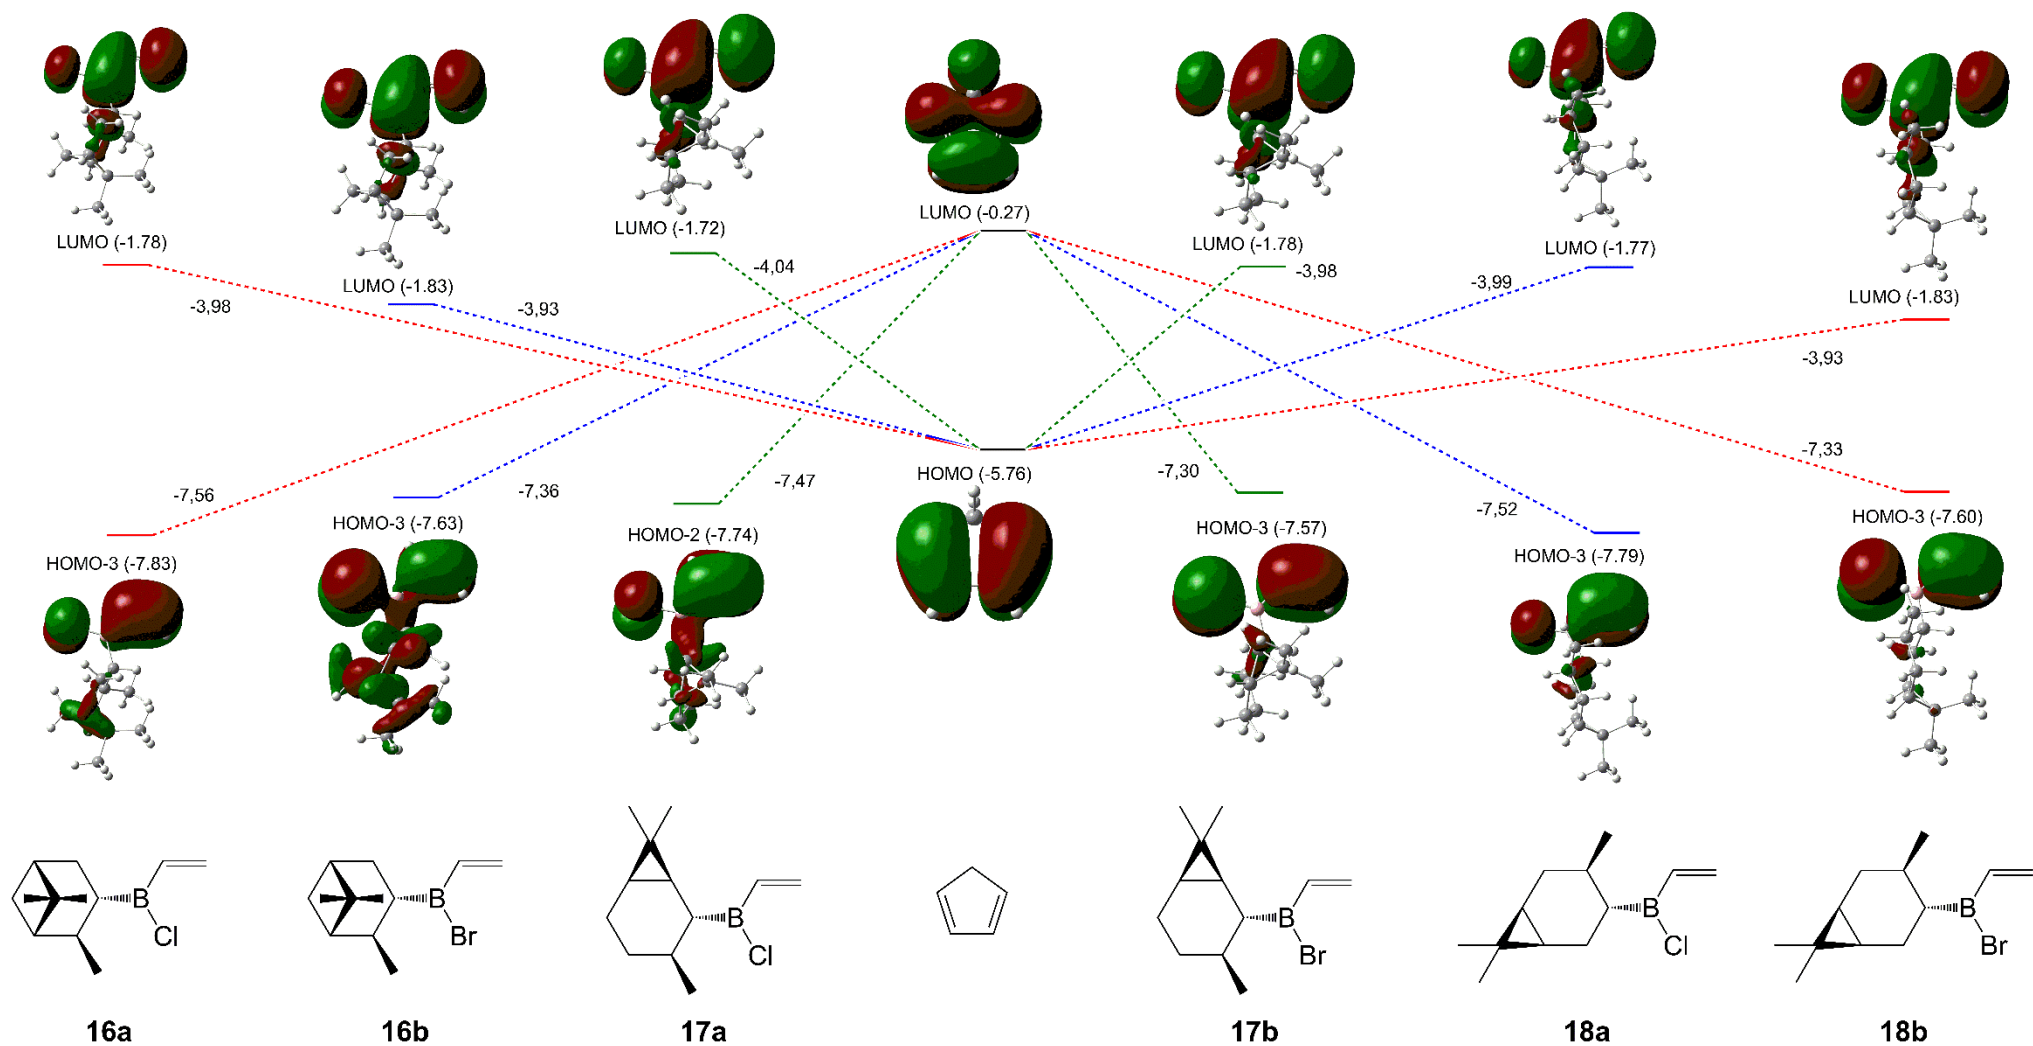

Figure S1. Shapes and energies (in eV) of FMOs of reactants (top: LUMOs, bottom: HOMOs).

**Table S1.** Global reactivity indices and FMO energies for reactants **10-18** calculated at the B3LYP/6-31G\* level.

|                       | HOMO (eV) | LUMO (eV) | $\omega$ (eV) | N (eV)      |
|-----------------------|-----------|-----------|---------------|-------------|
| <b>CP</b>             | -5.76     | -0.27     | 0.83          | <b>3.36</b> |
| <b>10</b>             | -7.42     | -1.32     | <b>1.57</b>   | 1.70        |
| <b>11<sup>a</sup></b> | -7.77     | -1.76     | <b>1.89</b>   | 1.35        |
| <b>11b</b>            | -7.57     | -1.81     | <b>1.91</b>   | 1.55        |
| <b>16<sup>a</sup></b> | -7.83     | -1.78     | <b>1.91</b>   | 1.29        |
| <b>16b</b>            | -7.63     | -1.83     | <b>1.93</b>   | 1.49        |
| <b>17<sup>a</sup></b> | -7.74     | -1.72     | <b>1.86</b>   | 1.38        |
| <b>17b</b>            | -7.57     | -1.78     | <b>1.89</b>   | 1.55        |
| <b>18<sup>a</sup></b> | -7.79     | -1.77     | <b>1.90</b>   | 1.33        |
| <b>18b</b>            | -7.60     | -1.83     | <b>1.93</b>   | 1.52        |

**Table S2.** Local reactivity indices for reactants **10-18** calculated at the B3LYP/6-31G\* level.

|                       | 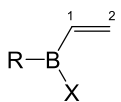 |  |               |          |          |
|-----------------------|-------------------------------------------------------------------------------------|---------------------------------------------------------------------------------------|---------------|----------|----------|
|                       | $\omega_B$                                                                          | $\omega_{C1}$                                                                         | $\omega_{C2}$ | $N_{C1}$ | $N_{C2}$ |
| <b>CP</b>             |                                                                                     |                                                                                       |               | 1.59     | 0.27     |
| <b>10</b>             | 1.03                                                                                | -0.16                                                                                 | 0.77          |          |          |
| <b>11<sup>a</sup></b> | 1.23                                                                                | -0.20                                                                                 | 0.95          |          |          |
| <b>11b</b>            | 1.25                                                                                | -0.22                                                                                 | 0.96          |          |          |
| <b>16<sup>a</sup></b> | 1.24                                                                                | -0.20                                                                                 | 0.96          |          |          |
| <b>16b</b>            | 1.26                                                                                | -0.21                                                                                 | 0.97          |          |          |
| <b>17<sup>a</sup></b> | 1.20                                                                                | -0.20                                                                                 | 0.94          |          |          |
| <b>17b</b>            | 1.22                                                                                | -0.22                                                                                 | 0.95          |          |          |
| <b>18<sup>a</sup></b> | 1.23                                                                                | -0.20                                                                                 | 0.95          |          |          |
| <b>18b</b>            | 1.25                                                                                | -0.22                                                                                 | 0.97          |          |          |

**Table S3.** Global electron density transfer (GEDT) for transition structures computed for the Diels-Alder reactions between **10-18** and cyclopentadiene (**cp**) at the B3LYP/6-31G\* level (in e).

|                 | <i>Endo</i> |  | <i>exo</i> |  |
|-----------------|-------------|--|------------|--|
| <b>TS10+cp</b>  | 0.132       |  | 0.130      |  |
| <b>TS11a+cp</b> | 0.176       |  | 0.169      |  |
| <b>TS11b+cp</b> | 0.187       |  | 0.177      |  |

  

|                 | <i>Re endo</i> | <i>Re exo</i> | <i>Si endo</i> | <i>Si exo</i> |
|-----------------|----------------|---------------|----------------|---------------|
| <b>TS16a+cp</b> | 0.178          | 0.166         | 0.183          | 0.174         |
| <b>TS16b+cp</b> | 0.187          | 0.181         | 0.192          | 0.181         |
| <b>TS17a+cp</b> | 0.173          | 0.167         | 0.182          | 0.175         |
| <b>TS17b+cp</b> | 0.182          | 0.173         | 0.191          | 0.180         |
| <b>TS18a+cp</b> | 0.180          | 0.174         | 0.176          | 0.172         |
| <b>TS18b+cp</b> | 0.197          | 0.187         | 0.192          | 0.183         |



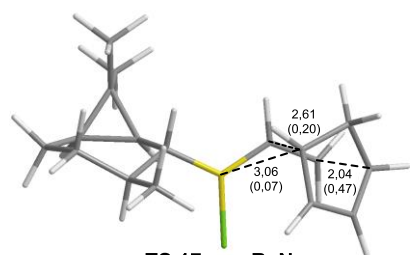

**TS 17a+cpReN**  
 $\Delta G^* = 13.56$  (0.23)

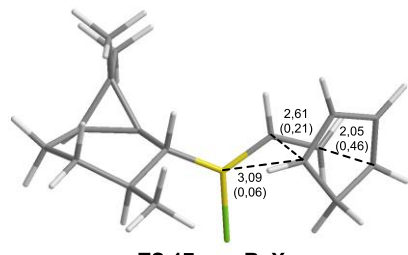

**TS 17a+cpReX**  
 $\Delta G^* = 13.97$  (0.63)

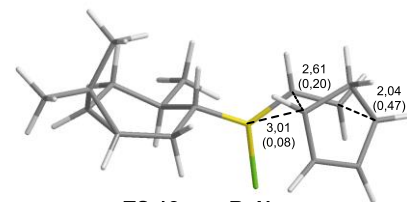

**TS 18a+cpReN**  
 $\Delta G^* = 12.99$  (0.00)

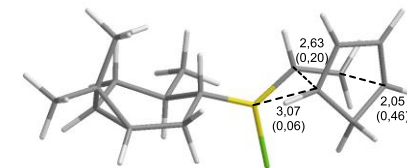

**TS 18a+cpReX**  
 $\Delta G^* = 13.50$  (0.51)

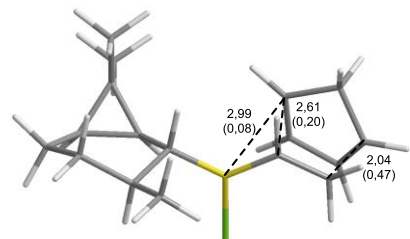

**TS 17a+cpSiN**  
 $\Delta G^* = 13.34$  (0.00)

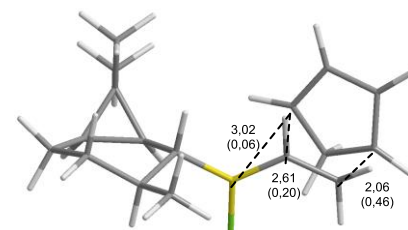

**TS 17a+cpSiX**  
 $\Delta G^* = 13.72$  (0.38)

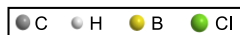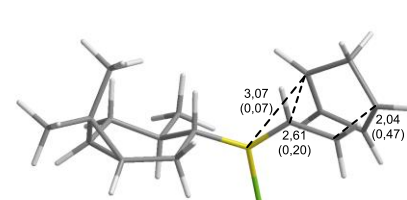

**TS 18a+cpSiN**  
 $\Delta G^* = 13.16$  (0.16)

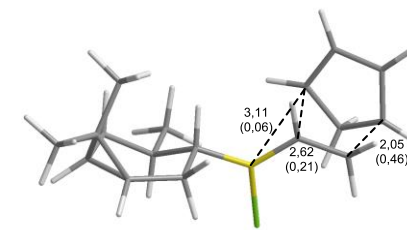

**TS 18a+cpSiX**  
 $\Delta G^* = 13.57$  (0.58)

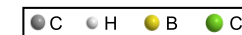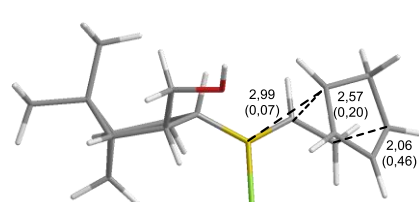

**TS 19a+cpReN**  
 $\Delta G^* = 13.71$  (0.83)

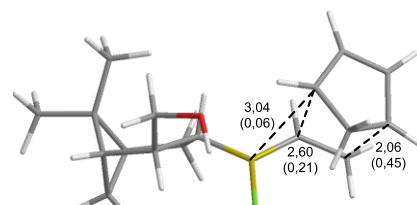

**TS 19a+cpReX**  
 $\Delta G^* = 12.88$  (0.00)

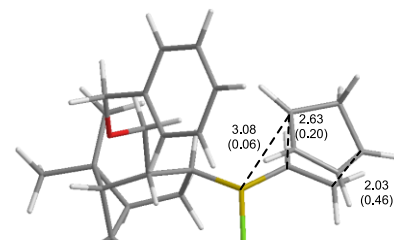

**TS 20a+cpReN**  
 $\Delta G^* = 15.40$  (1.38)

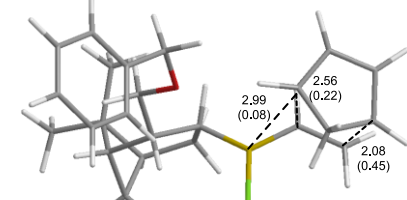

**TS 20a+cpReX**  
 $\Delta G^* = 14.02$  (0.00)

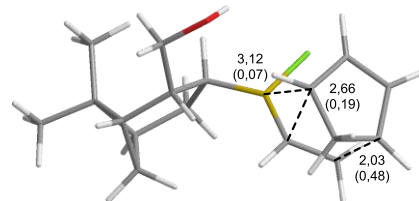

**TS 19a+cpSiN**  
 $\Delta G^* = 13.79$  (0.91)

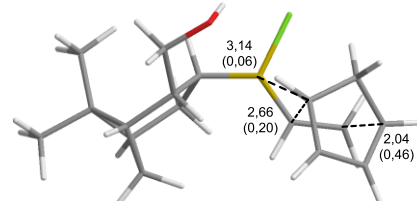

**TS 19a+cpSiX**  
 $\Delta G^* = 13.82$  (0.93)

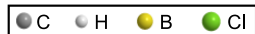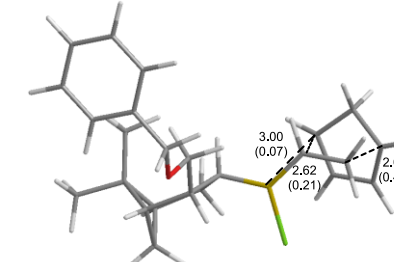

**TS 20a+cpSiN**  
 $\Delta G^* = 14.02$  (0.00)

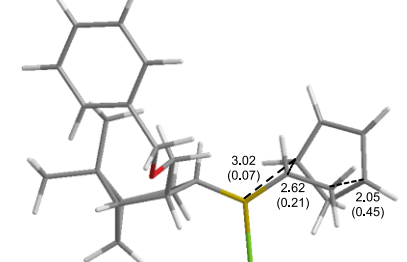

**TS 20a+cpSiX**  
 $\Delta G^* = 14.48$  (0.46)

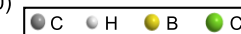

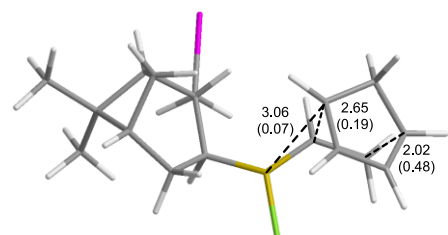

**TS 21a+cpReN**  
 $\Delta G^* = 16.00$  (0.92)

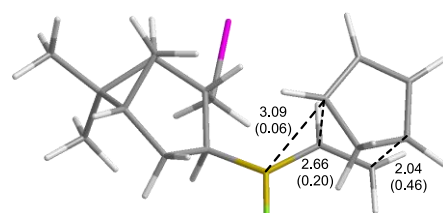

**TS 21a+cpReX**  
 $\Delta G^* = 16.54$  (1.47)

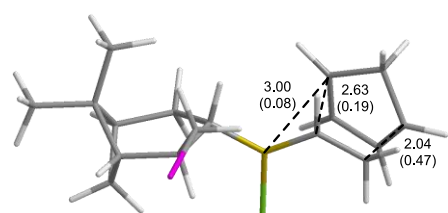

**TS 21a+cpSiN**  
 $\Delta G^* = 15.08$  (0.00)

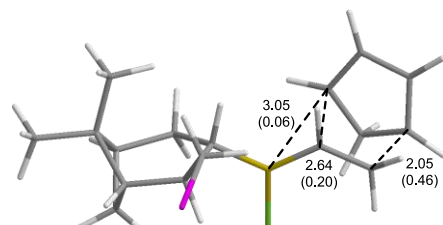

**TS 21a+cpSiX**  
 $\Delta G^* = 15.69$  (0.61)

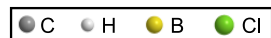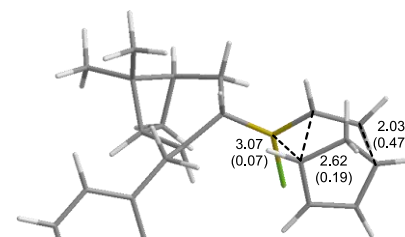

**TS 22a+cpReN**  
 $\Delta G^* = 14.67$  (1.10)

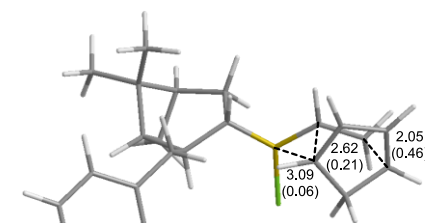

**TS 22a+cpReN**  
 $\Delta G^* = 15.15$  (1.59)

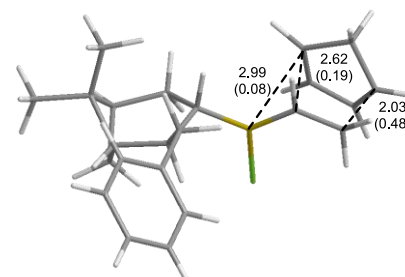

**TS 22a+cpReN**  
 $\Delta G^* = 13.56$  (0.00)

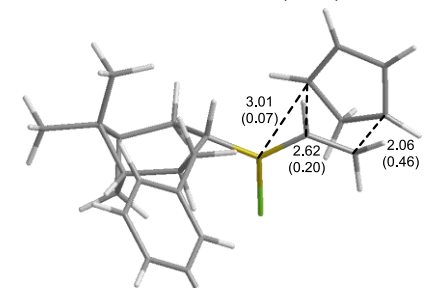

**TS 22a+cpReN**  
 $\Delta G^* = 14.07$  (0.51)

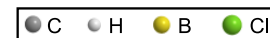

## Cartesian coordinates of reactants, TSs and products

### Reactants

#### Cyclopentadiene

|     |           |           |           |
|-----|-----------|-----------|-----------|
| C 0 | -1.110428 | -0.484303 | 0.948296  |
| C 0 | -1.359052 | 0.048076  | -0.439189 |
| C 0 | 0.027097  | 0.157511  | -1.019681 |
| C 0 | 0.924160  | -0.251366 | -0.099150 |
| C 0 | 0.216283  | -0.650763 | 1.125513  |
| H 0 | -1.895359 | -0.690610 | 1.667047  |
| H 0 | -1.876913 | 1.019698  | -0.421645 |
| H 0 | -2.001834 | -0.623264 | -1.029671 |
| H 0 | 0.237109  | 0.512567  | -2.022233 |
| H 0 | 2.001834  | -0.287417 | -0.223145 |
| H 0 | 0.703966  | -1.019698 | 2.022233  |

Energy + ZPE = -194.008161

Free energy = -194.034758

Free energy in DCM = -194.101477

Free energy in heptane = -194.101511

Number of imaginary frequencies = 0

#### Vinylborane 10

|     |           |           |           |
|-----|-----------|-----------|-----------|
| C 0 | -1.195671 | -1.166359 | -0.486404 |
| C 0 | -1.195671 | 0.386681  | -0.486404 |
| C 0 | -2.619500 | -1.746498 | -0.486404 |
| B 0 | 0.284050  | 0.968102  | -0.443466 |
| C 0 | -2.046273 | 0.910958  | 0.702500  |
| C 0 | -3.448540 | -1.208413 | 0.688812  |
| C 0 | 0.851356  | 1.861230  | -1.597839 |
| C 0 | 1.236961  | 0.650506  | 0.793045  |
| C 0 | -3.468514 | 0.326943  | 0.700317  |
| C 0 | 0.177894  | 2.218743  | -2.704590 |
| C 0 | 1.654640  | 1.944420  | 1.544189  |
| C 0 | 2.504722  | -0.133095 | 0.355240  |
| C 0 | 3.445152  | -0.421975 | 1.537018  |
| C 0 | 2.596534  | 1.652001  | 2.723938  |
| C 0 | 3.837104  | 0.865593  | 2.276230  |
| H 0 | -0.661446 | -1.533913 | 0.401900  |
| H 0 | -0.643608 | -1.544213 | -1.357697 |
| H 0 | -1.714791 | 0.700326  | -1.405853 |
| H 0 | -3.117073 | -1.481926 | -1.431274 |
| H 0 | -2.578179 | -2.843331 | -0.452133 |
| H 0 | -2.098108 | 2.007897  | 0.675262  |
| H 0 | -1.554665 | 0.647607  | 1.650436  |
| H 0 | -4.471962 | -1.603188 | 0.646408  |
| H 0 | -3.012780 | -1.570031 | 1.632370  |
| H 0 | 1.875282  | 2.236947  | -1.521454 |
| H 0 | 0.711097  | 0.016502  | 1.524872  |
| H 0 | -4.026436 | 0.693581  | 1.572220  |
| H 0 | -4.005806 | 0.688470  | -0.189056 |
| H 0 | 0.615547  | 2.843331  | -3.482681 |

|     |           |           |           |
|-----|-----------|-----------|-----------|
| H 0 | -0.847313 | 1.901513  | -2.884155 |
| H 0 | 0.764549  | 2.476174  | 1.906769  |
| H 0 | 2.158058  | 2.630517  | 0.847351  |
| H 0 | 2.218696  | -1.077599 | -0.127060 |
| H 0 | 3.052665  | 0.444237  | -0.403824 |
| H 0 | 4.343055  | -0.945671 | 1.182800  |
| H 0 | 2.942344  | -1.103447 | 2.239182  |
| H 0 | 2.053292  | 1.069375  | 3.482681  |
| H 0 | 2.895668  | 2.591637  | 3.207184  |
| H 0 | 4.441688  | 1.496056  | 1.606842  |
| H 0 | 4.471962  | 0.630791  | 3.140396  |

Energy + ZPE = -573.035437

Free energy = -573.078945

Free energy in DCM = -573.396396

Free energy in heptane = -573.400542

Number of imaginary frequencies = 0

#### Vinylborane 11a

|      |           |           |           |
|------|-----------|-----------|-----------|
| C 0  | 1.123192  | 0.471101  | 0.432107  |
| C 0  | 1.123192  | 2.007988  | 0.432107  |
| C 0  | -0.319081 | -0.106440 | 0.432107  |
| C 0  | 0.314254  | 2.575274  | 1.607542  |
| C 0  | -1.121199 | 0.477026  | 1.627895  |
| B 0  | -0.330499 | -1.683010 | 0.418743  |
| C 0  | -1.114877 | 2.013897  | 1.624525  |
| Cl 0 | 0.409310  | -2.545869 | 1.810851  |
| C 0  | -0.923993 | -2.588803 | -0.689688 |
| C 0  | -1.515502 | -2.119878 | -1.802041 |
| H 0  | 1.655207  | 0.106622  | 1.321179  |
| H 0  | 1.680382  | 0.099241  | -0.438056 |
| H 0  | 2.155736  | 2.379488  | 0.466326  |
| H 0  | 0.692224  | 2.370808  | -0.513103 |
| H 0  | -0.807964 | 0.253524  | -0.487241 |
| H 0  | 0.816145  | 2.313566  | 2.550848  |
| H 0  | 0.291752  | 3.671660  | 1.559875  |
| H 0  | -0.681552 | 0.112796  | 2.566182  |
| H 0  | -2.155736 | 0.109372  | 1.605781  |
| H 0  | -1.657486 | 2.377008  | 0.738795  |
| H 0  | -1.660892 | 2.389566  | 2.499779  |
| H 0  | -0.863818 | -3.671660 | -0.570830 |
| H 0  | -1.924729 | -2.778737 | -2.566182 |
| H 0  | -1.616743 | -1.054678 | -1.997895 |

Energy + ZPE = -798.164932

Free energy = -798.203580

Free energy in DCM = -798.369611

Free energy in heptane = -798.371598

Number of imaginary frequencies = 0

#### Vinylborane 11b

|     |          |          |          |
|-----|----------|----------|----------|
| C 0 | 1.119101 | 0.482404 | 0.416600 |
| C 0 | 1.129784 | 2.018388 | 0.440108 |

|    |   |           |           |           |
|----|---|-----------|-----------|-----------|
| C  | 0 | -0.326710 | -0.088627 | 0.412851  |
| C  | 0 | 0.327162  | 2.571660  | 1.626415  |
| C  | 0 | -1.127472 | 0.488468  | 1.613769  |
| B  | 0 | -0.336306 | -1.663270 | 0.402821  |
| C  | 0 | -1.107458 | 2.024426  | 1.632305  |
| Br | 0 | 0.473654  | -2.566735 | 1.927343  |
| C  | 0 | -0.920832 | -2.588836 | -0.689384 |
| C  | 0 | -1.515328 | -2.135918 | -1.807274 |
| H  | 0 | 1.650232  | 0.096417  | 1.296788  |
| H  | 0 | 1.669948  | 0.119829  | -0.461522 |
| H  | 0 | 2.165075  | 2.381741  | 0.478165  |
| H  | 0 | 0.699674  | 2.399201  | -0.498327 |
| H  | 0 | -0.815105 | 0.274864  | -0.505494 |
| H  | 0 | 0.826003  | 2.284894  | 2.563977  |
| H  | 0 | 0.316376  | 3.668910  | 1.600617  |
| H  | 0 | -0.694682 | 0.102746  | 2.546362  |
| H  | 0 | -2.165075 | 0.130180  | 1.582110  |
| H  | 0 | -1.644955 | 2.405527  | 0.751093  |
| H  | 0 | -1.651685 | 2.392044  | 2.512063  |
| H  | 0 | -0.852036 | -3.668910 | -0.554812 |
| H  | 0 | -1.920379 | -2.805821 | -2.563977 |
| H  | 0 | -1.623040 | -1.073524 | -2.014783 |

Energy + ZPE = -2909.672434  
Free energy = -2909.711097  
Free energy in DCM = -2909.876764  
Free energy in heptane = -2909.878892  
Number of imaginary frequencies = 0

**Vinylborane 16a**

|    |   |           |           |           |
|----|---|-----------|-----------|-----------|
| Cl | 0 | -3.069293 | -1.508824 | -0.510834 |
| C  | 0 | -3.065748 | 1.321767  | -0.551785 |
| C  | 0 | -2.613062 | 2.578822  | -0.401179 |
| B  | 0 | -2.220621 | 0.056554  | -0.252611 |
| C  | 0 | -0.717484 | 0.028602  | 0.224740  |
| C  | 0 | 0.231917  | -0.497770 | -0.929057 |
| C  | 0 | 1.349046  | -1.403036 | -0.369876 |
| C  | 0 | 1.974514  | -0.938112 | 0.999977  |
| C  | 0 | 0.716169  | -1.617585 | 1.640758  |
| C  | 0 | -0.528144 | -0.716339 | 1.600620  |
| C  | 0 | 0.752677  | 0.657987  | -1.796181 |
| C  | 0 | 3.265731  | -1.722161 | 1.303244  |
| C  | 0 | 0.667644  | -2.561208 | 0.411219  |
| C  | 0 | 2.270497  | 0.536721  | 1.302261  |
| H  | 0 | -4.091065 | 1.196668  | -0.902883 |
| H  | 0 | -3.229854 | 3.449665  | -0.616971 |
| H  | 0 | -1.604696 | 2.792636  | -0.053964 |
| H  | 0 | -0.420768 | 1.068994  | 0.395570  |
| H  | 0 | -0.351390 | -1.150215 | -1.594450 |
| H  | 0 | 2.055167  | -1.666635 | -1.168707 |
| H  | 0 | 0.836397  | -2.064353 | 2.636277  |
| H  | 0 | -1.395905 | -1.348061 | 1.826889  |
| H  | 0 | -0.480707 | 0.036062  | 2.398084  |
| H  | 0 | -0.076227 | 1.242199  | -2.214415 |
| H  | 0 | 1.389064  | 1.344288  | -1.227173 |
| H  | 0 | 1.344124  | 0.274209  | -2.636277 |

|   |   |           |           |          |
|---|---|-----------|-----------|----------|
| H | 0 | 3.558760  | -1.586495 | 2.352230 |
| H | 0 | 3.174700  | -2.796904 | 1.123659 |
| H | 0 | 4.091065  | -1.353686 | 0.680526 |
| H | 0 | -0.324718 | -2.869760 | 0.065588 |
| H | 0 | 1.293700  | -3.449665 | 0.515757 |
| H | 0 | 3.082933  | 0.907959  | 0.664570 |
| H | 0 | 1.416219  | 1.201872  | 1.169018 |
| H | 0 | 2.606306  | 0.642128  | 2.342465 |

Energy + ZPE = -954.072615  
Free energy = -954.115140  
Free energy in DCM = -954.363646  
Free energy in heptane = -954.366543  
Number of imaginary frequencies = 0

**Vinylborane 16b**

|    |   |           |           |           |
|----|---|-----------|-----------|-----------|
| Br | 0 | -3.137244 | -1.641128 | -0.330880 |
| C  | 0 | -3.071833 | 1.295916  | -0.698250 |
| C  | 0 | -2.656307 | 2.572137  | -0.612188 |
| B  | 0 | -2.234458 | 0.085349  | -0.218974 |
| C  | 0 | -0.741507 | 0.103623  | 0.281636  |
| C  | 0 | 0.189322  | -0.390353 | -0.909921 |
| C  | 0 | 1.293105  | -1.339469 | -0.402247 |
| C  | 0 | 1.964376  | -0.924803 | 0.961398  |
| C  | 0 | 0.709481  | -1.593716 | 1.618666  |
| C  | 0 | -0.507610 | -0.656567 | 1.640153  |
| C  | 0 | 0.719211  | 0.786801  | -1.740795 |
| C  | 0 | 3.246289  | -1.741127 | 1.210819  |
| C  | 0 | 0.602074  | -2.501300 | 0.365654  |
| C  | 0 | 2.291615  | 0.537065  | 1.290524  |
| H  | 0 | -4.063316 | 1.114751  | -1.114828 |
| H  | 0 | -3.270049 | 3.407819  | -0.944411 |
| H  | 0 | -1.685143 | 2.837184  | -0.200260 |
| H  | 0 | -0.467672 | 1.150909  | 0.453416  |
| H  | 0 | -0.415120 | -1.006134 | -1.592374 |
| H  | 0 | 1.972063  | -1.598517 | -1.225691 |
| H  | 0 | 0.848014  | -2.069834 | 2.597932  |
| H  | 0 | -1.385827 | -1.260427 | 1.896518  |
| H  | 0 | -0.399364 | 0.085971  | 2.441016  |
| H  | 0 | -0.105786 | 1.393659  | -2.132548 |
| H  | 0 | 1.369225  | 1.445024  | -1.154948 |
| H  | 0 | 1.298621  | 0.422478  | -2.597932 |
| H  | 0 | 3.568375  | -1.638598 | 2.255040  |
| H  | 0 | 3.126783  | -2.808942 | 1.007284  |
| H  | 0 | 4.063316  | -1.374306 | 0.576261  |
| H  | 0 | -0.408314 | -2.771023 | 0.042166  |
| H  | 0 | 1.207671  | -3.407819 | 0.427572  |
| H  | 0 | 3.087294  | 0.914495  | 0.635619  |
| H  | 0 | 1.440863  | 1.214612  | 1.201725  |
| H  | 0 | 2.661777  | 0.613065  | 2.321629  |

Energy + ZPE = -3065.581406  
Free energy = -3065.624032  
Free energy in DCM = -3065.872541  
Free energy in heptane = -3065.875542  
Number of imaginary frequencies = 0

**Vinylborane 17a**

|    |   |           |           |           |
|----|---|-----------|-----------|-----------|
| Cl | 0 | -1.398275 | -2.626328 | -0.517022 |
| B  | 0 | -1.367266 | -0.836936 | -0.337843 |
| C  | 0 | 0.034100  | -0.108733 | -0.365883 |
| C  | 0 | -2.745559 | -0.165262 | -0.114323 |
| C  | 0 | 0.916942  | -0.468957 | -1.595334 |
| C  | 0 | 0.753218  | -0.416149 | 0.967969  |
| C  | 0 | -2.916460 | 1.159767  | 0.033578  |
| C  | 0 | 2.278097  | 0.236160  | -1.490318 |
| C  | 0 | 2.273916  | -0.426573 | 1.019045  |
| C  | 0 | 0.219719  | -0.110369 | -2.914434 |
| C  | 0 | 1.499727  | 0.632164  | 1.783181  |
| C  | 0 | 3.088935  | -0.189102 | -0.249126 |
| C  | 0 | 1.539450  | 2.093472  | 1.370805  |
| C  | 0 | 1.445796  | 0.462132  | 3.295520  |
| H  | 0 | -0.151370 | 0.973924  | -0.426350 |
| H  | 0 | -3.635204 | -0.795426 | -0.072080 |
| H  | 0 | 1.089538  | -1.554392 | -1.578841 |
| H  | 0 | 0.278581  | -1.188024 | 1.572798  |
| H  | 0 | -2.081909 | 1.856598  | 0.004356  |
| H  | 0 | -3.896743 | 1.606487  | 0.191336  |
| H  | 0 | 2.112213  | 1.322437  | -1.499322 |
| H  | 0 | 2.873544  | 0.020061  | -2.387468 |
| H  | 0 | 2.707279  | -1.199252 | 1.653446  |
| H  | 0 | 0.003039  | 0.965015  | -2.966046 |
| H  | 0 | 0.850561  | -0.361906 | -3.775276 |
| H  | 0 | -0.729174 | -0.647207 | -3.033886 |
| H  | 0 | 3.896743  | 0.532434  | -0.063642 |
| H  | 0 | 3.585513  | -1.139342 | -0.486419 |
| H  | 0 | 0.655575  | 2.626328  | 1.746922  |
| H  | 0 | 2.421538  | 2.584880  | 1.801159  |
| H  | 0 | 1.580215  | 2.242516  | 0.290174  |
| H  | 0 | 1.419575  | -0.595333 | 3.581985  |
| H  | 0 | 2.323603  | 0.915243  | 3.775276  |
| H  | 0 | 0.552539  | 0.943279  | 3.715762  |

Energy + ZPE = -954.082390

Free energy = -954.125854

Free energy in DCM = -954.371070

Free energy in heptane = -954.374051

Number of imaginary frequencies = 0

**Vinylborane 17b**

|    |   |           |           |           |
|----|---|-----------|-----------|-----------|
| Br | 0 | -1.330705 | -2.790592 | -0.440174 |
| B  | 0 | -1.330705 | -0.841446 | -0.440174 |
| C  | 0 | 0.071745  | -0.120882 | -0.440174 |
| C  | 0 | -2.723086 | -0.170900 | -0.386487 |
| C  | 0 | 1.035258  | -0.602967 | -1.563857 |
| C  | 0 | 0.701277  | -0.307327 | 0.959500  |
| C  | 0 | -2.903017 | 1.161490  | -0.369726 |
| C  | 0 | 2.380767  | 0.128363  | -1.444828 |
| C  | 0 | 2.215446  | -0.297663 | 1.110497  |
| C  | 0 | 0.423308  | -0.409230 | -2.957107 |
| C  | 0 | 1.386080  | 0.812583  | 1.730323  |
| C  | 0 | 3.112016  | -0.158310 | -0.116756 |

|   |   |           |           |           |
|---|---|-----------|-----------|-----------|
| C | 0 | 1.450854  | 2.232914  | 1.195925  |
| C | 0 | 1.230536  | 0.772127  | 3.244529  |
| H | 0 | -0.097012 | 0.952056  | -0.615746 |
| H | 0 | -3.611038 | -0.803282 | -0.357121 |
| H | 0 | 1.208945  | -1.677732 | -1.412871 |
| H | 0 | 0.192759  | -1.036241 | 1.589104  |
| H | 0 | -2.066404 | 1.856067  | -0.395336 |
| H | 0 | -3.891578 | 1.615810  | -0.327756 |
| H | 0 | 2.207691  | 1.205998  | -1.574216 |
| H | 0 | 3.035560  | -0.168370 | -2.275018 |
| H | 0 | 2.608120  | -1.010815 | 1.834713  |
| H | 0 | 0.175572  | 0.644833  | -3.139965 |
| H | 0 | 1.119879  | -0.726533 | -3.742280 |
| H | 0 | -0.495965 | -0.995481 | -3.075565 |
| H | 0 | 3.891578  | 0.597353  | 0.053015  |
| H | 0 | 3.641235  | -1.113797 | -0.228900 |
| H | 0 | 0.543100  | 2.790592  | 1.463681  |
| H | 0 | 2.301367  | 2.766459  | 1.639680  |
| H | 0 | 1.564595  | 2.287238  | 0.111404  |
| H | 0 | 1.191375  | -0.257209 | 3.618316  |
| H | 0 | 2.069978  | 1.275655  | 3.742280  |
| H | 0 | 0.307122  | 1.275941  | 3.560098  |

Energy + ZPE = -3065.590421

Free energy = -3065.634796

Free energy in DCM = -3065.878492

Free energy in heptane = -3065.881694

Number of imaginary frequencies = 0

**Vinylborane 18a**

|    |   |           |           |           |
|----|---|-----------|-----------|-----------|
| C  | 0 | -1.119415 | -1.162933 | 0.076510  |
| C  | 0 | -1.130475 | 0.378409  | 0.120860  |
| C  | 0 | 0.323861  | 0.921208  | 0.095436  |
| C  | 0 | 1.079565  | 0.481649  | -1.203417 |
| C  | 0 | 0.752866  | -0.910501 | -1.740110 |
| C  | 0 | -0.366670 | -1.732771 | -1.122196 |
| C  | 0 | -1.907623 | 0.868180  | 1.350956  |
| C  | 0 | 1.073532  | -2.223103 | -1.052497 |
| C  | 0 | 1.836617  | -2.269175 | 0.259776  |
| C  | 0 | 1.430044  | -3.385777 | -1.968819 |
| Cl | 0 | -0.488554 | 3.517792  | -0.914527 |
| B  | 0 | 0.431780  | 2.490574  | 0.240259  |
| C  | 0 | 1.303156  | 3.258359  | 1.266210  |
| C  | 0 | 2.058915  | 2.658950  | 2.202563  |
| H  | 0 | -0.701932 | -1.536353 | 1.022774  |
| H  | 0 | -2.155255 | -1.523409 | 0.047446  |
| H  | 0 | -1.643255 | 0.743569  | -0.780446 |
| H  | 0 | 0.835211  | 0.471295  | 0.958805  |
| H  | 0 | 2.161480  | 0.587918  | -1.043337 |
| H  | 0 | 0.823038  | 1.188526  | -2.002002 |
| H  | 0 | 0.817783  | -0.953654 | -2.827005 |
| H  | 0 | -0.996667 | -2.273952 | -1.826331 |
| H  | 0 | -1.403636 | 0.569865  | 2.279851  |
| H  | 0 | -2.012537 | 1.959413  | 1.363302  |
| H  | 0 | -2.917677 | 0.441404  | 1.372186  |
| H  | 0 | 1.641326  | -3.212267 | 0.787456  |

|   |   |          |           |           |
|---|---|----------|-----------|-----------|
| H | 0 | 2.917677 | -2.216412 | 0.075857  |
| H | 0 | 1.581390 | -1.454614 | 0.940958  |
| H | 0 | 0.867951 | -3.345620 | -2.908774 |
| H | 0 | 2.499127 | -3.378468 | -2.220166 |
| H | 0 | 1.208658 | -4.348769 | -1.489504 |
| H | 0 | 1.315038 | 4.348769  | 1.233253  |
| H | 0 | 2.666780 | 3.222068  | 2.908774  |
| H | 0 | 2.103262 | 1.576949  | 2.304425  |

Energy + ZPE = -954.081976

Free energy = -954.125302

Free energy in DCM = -954.371210

Free energy in heptane = -954.374219

Number of imaginary frequencies = 0

### Vinylborane 18b

|    |   |           |           |           |
|----|---|-----------|-----------|-----------|
| C  | 0 | -1.116433 | -1.168420 | 0.087917  |
| C  | 0 | -1.121185 | 0.372149  | 0.140481  |
| C  | 0 | 0.335845  | 0.909328  | 0.130874  |
| C  | 0 | 1.090029  | 0.479922  | -1.172050 |
| C  | 0 | 0.764177  | -0.908001 | -1.718830 |
| C  | 0 | -0.358480 | -1.732765 | -1.110306 |
| C  | 0 | -1.912872 | 0.865506  | 1.359338  |
| C  | 0 | 1.080711  | -2.225369 | -1.038280 |
| C  | 0 | 1.839999  | -2.280487 | 0.275866  |
| C  | 0 | 1.437433  | -3.383350 | -1.960319 |
| Br | 0 | -0.581919 | 3.568364  | -0.967373 |
| B  | 0 | 0.446442  | 2.475894  | 0.278083  |
| C  | 0 | 1.323606  | 3.258679  | 1.282766  |
| C  | 0 | 2.098636  | 2.668128  | 2.209603  |
| H  | 0 | -0.707325 | -1.550256 | 1.034453  |
| H  | 0 | -2.153690 | -1.524034 | 0.049264  |
| H  | 0 | -1.618221 | 0.747337  | -0.765396 |
| H  | 0 | 0.843745  | 0.454202  | 0.993980  |
| H  | 0 | 2.172423  | 0.588437  | -1.016362 |
| H  | 0 | 0.824691  | 1.195525  | -1.959962 |
| H  | 0 | 0.833739  | -0.944135 | -2.805744 |
| H  | 0 | -0.986204 | -2.269103 | -1.820242 |
| H  | 0 | -1.418317 | 0.577912  | 2.296562  |
| H  | 0 | -2.021175 | 1.956258  | 1.355163  |
| H  | 0 | -2.921378 | 0.434773  | 1.372338  |
| H  | 0 | 1.647518  | -3.229549 | 0.793782  |
| H  | 0 | 2.921378  | -2.220862 | 0.095761  |
| H  | 0 | 1.578814  | -1.473783 | 0.963894  |
| H  | 0 | 0.881978  | -3.332949 | -2.903746 |
| H  | 0 | 2.508223  | -3.380765 | -2.204496 |
| H  | 0 | 1.206868  | -4.348410 | -1.489592 |
| H  | 0 | 1.324676  | 4.348410  | 1.241526  |
| H  | 0 | 2.713962  | 3.238138  | 2.903746  |
| H  | 0 | 2.151104  | 1.586779  | 2.314644  |

Energy + ZPE = -3065.590106

Free energy = -3065.634015

Free energy in DCM = -3065.879002

Free energy in heptane = -3065.882207

Number of imaginary frequencies = 0

### Vinylborane 19a

|    |   |           |           |           |
|----|---|-----------|-----------|-----------|
| C  | 0 | 1.408487  | 3.279371  | -0.716203 |
| C  | 0 | 1.400700  | 4.601564  | -0.949809 |
| B  | 0 | 0.159818  | 2.362449  | -0.654930 |
| C  | 0 | 0.235477  | 0.860113  | -0.187851 |
| O  | 0 | 0.374310  | 0.634875  | -3.053997 |
| C  | 0 | -0.668764 | -0.135387 | -0.979194 |
| C  | 0 | 0.070039  | 0.741400  | 1.374797  |
| C  | 0 | 0.022094  | -0.522121 | -2.289952 |
| C  | 0 | -1.131765 | -1.323105 | -0.109483 |
| C  | 0 | -0.580661 | -0.587867 | 1.803523  |
| C  | 0 | -0.088865 | -1.820903 | 0.963882  |
| C  | 0 | -1.942034 | -0.711847 | 1.069707  |
| C  | 0 | -0.550741 | -3.151223 | 1.592867  |
| C  | 0 | 1.400103  | -1.994439 | 0.633622  |
| Cl | 0 | -1.453044 | 3.094476  | -1.011242 |
| H  | 0 | 2.378780  | 2.807864  | -0.544058 |
| H  | 0 | 2.312806  | 5.195467  | -0.969546 |
| H  | 0 | 0.473806  | 5.140713  | -1.131655 |
| H  | 0 | 1.269496  | 0.569424  | -0.404781 |
| H  | 0 | -0.451215 | 1.078775  | -3.307580 |
| H  | 0 | -1.595333 | 0.381248  | -1.271900 |
| H  | 0 | -0.555595 | 1.552474  | 1.771828  |
| H  | 0 | 1.055764  | 0.859694  | 1.841390  |
| H  | 0 | 0.966232  | -1.044746 | -2.106010 |
| H  | 0 | -0.621527 | -1.196667 | -2.876789 |
| H  | 0 | -1.616549 | -2.094964 | -0.722554 |
| H  | 0 | -0.569408 | -0.687747 | 2.896492  |
| H  | 0 | -2.634064 | -1.411590 | 1.541884  |
| H  | 0 | -2.476196 | 0.222251  | 0.862597  |
| H  | 0 | -0.371447 | -3.982403 | 0.898953  |
| H  | 0 | 0.018719  | -3.358493 | 2.507711  |
| H  | 0 | -1.611815 | -3.167777 | 1.855208  |
| H  | 0 | 1.885940  | -1.099942 | 0.244006  |
| H  | 0 | 1.949633  | -2.296416 | 1.534784  |
| H  | 0 | 1.536807  | -2.794515 | -0.105709 |

Energy + ZPE = -1029.275086

Free energy = -1029.318857

Free energy in DCM = -1029.576889

Free energy in heptane = -1029.576554

Number of imaginary frequencies = 0

### Vinylborane 20a

|   |   |           |           |           |
|---|---|-----------|-----------|-----------|
| C | 0 | -1.604453 | 2.284903  | 2.359076  |
| C | 0 | -1.604453 | 3.683405  | 2.359076  |
| C | 0 | -2.830807 | 1.606997  | 2.359076  |
| C | 0 | -0.302109 | 1.505206  | 2.399988  |
| C | 0 | -4.031128 | 2.316227  | 2.363242  |
| C | 0 | -2.805402 | 4.396394  | 2.372871  |
| O | 0 | -0.302283 | 0.343820  | 1.584438  |
| C | 0 | -4.022146 | 3.713687  | 2.373895  |
| C | 0 | -0.232618 | 0.603524  | 0.184386  |
| C | 0 | -0.214850 | -0.748980 | -0.523598 |
| C | 0 | 0.988683  | -1.618427 | -0.019877 |

|    |   |           |           |           |
|----|---|-----------|-----------|-----------|
| C  | 0 | -0.259109 | -0.650838 | -2.062928 |
| B  | 0 | 0.682180  | -2.478229 | 1.265899  |
| C  | 0 | 1.621984  | -2.526616 | -1.144432 |
| C  | 0 | 1.143377  | -0.575210 | -2.778282 |
| C  | 0 | -0.372990 | -2.108236 | -2.593489 |
| C  | 0 | 1.625550  | -2.644518 | 2.486768  |
| C  | 0 | 1.177679  | -2.128663 | -2.562612 |
| C  | 0 | 0.976727  | -0.211480 | -4.266839 |
| C  | 0 | 2.283363  | 0.297772  | -2.237616 |
| Cl | 0 | -0.805785 | -3.490321 | 1.300962  |
| C  | 0 | 2.826386  | -2.052128 | 2.592792  |
| H  | 0 | -0.657816 | 4.220339  | 2.348288  |
| H  | 0 | -2.833541 | 0.520563  | 2.345785  |
| H  | 0 | 0.539262  | 2.164800  | 2.131277  |
| H  | 0 | -0.116384 | 1.134876  | 3.415457  |
| H  | 0 | -4.975820 | 1.778470  | 2.360135  |
| H  | 0 | -2.789134 | 5.483242  | 2.373559  |
| H  | 0 | -4.958297 | 4.265727  | 2.379023  |
| H  | 0 | 0.672269  | 1.192625  | -0.037308 |
| H  | 0 | -1.103389 | 1.192371  | -0.140216 |
| H  | 0 | -1.153603 | -1.239389 | -0.235112 |
| H  | 0 | 1.767554  | -0.908682 | 0.277624  |
| H  | 0 | -1.016760 | 0.075555  | -2.385735 |
| H  | 0 | 1.349317  | -3.581164 | -1.002706 |
| H  | 0 | 2.714541  | -2.480892 | -1.053741 |
| H  | 0 | -0.793850 | -2.181053 | -3.598133 |
| H  | 0 | -0.888715 | -2.823902 | -1.944150 |
| H  | 0 | 1.313945  | -3.297331 | 3.303482  |
| H  | 0 | 1.705034  | -2.729213 | -3.315048 |
| H  | 0 | 0.743864  | 0.855689  | -4.374827 |
| H  | 0 | 1.909011  | -0.402003 | -4.813661 |
| H  | 0 | 0.182245  | -0.772008 | -4.766885 |
| H  | 0 | 2.544723  | 0.101466  | -1.197245 |
| H  | 0 | 3.189989  | 0.141878  | -2.837091 |
| H  | 0 | 2.025861  | 1.361829  | -2.319883 |
| H  | 0 | 3.478728  | -2.204856 | 3.451065  |
| H  | 0 | 3.213193  | -1.387227 | 1.823242  |

Energy + ZPE = -1299.527344  
Free energy = -1299.581789  
Free energy in DCM = -1299.932490  
Free energy in heptane = -1299.935060  
Number of imaginary frequencies = 0

#### Vinylborane 21a

|    |   |           |           |           |
|----|---|-----------|-----------|-----------|
| Cl | 0 | 2.316796  | -2.615442 | 0.473216  |
| B  | 0 | 2.316796  | -0.818333 | 0.473216  |
| C  | 0 | 3.677039  | -0.074502 | 0.473216  |
| C  | 0 | 0.944080  | -0.053077 | 0.310758  |
| C  | 0 | 4.885071  | -0.659819 | 0.425502  |
| C  | 0 | -0.277561 | -0.608403 | 1.117372  |
| C  | 0 | 0.688056  | 0.063721  | -1.252059 |
| C  | 0 | -1.571177 | -0.646599 | 0.262630  |
| C  | 0 | -0.778738 | -0.168339 | -1.644237 |
| C  | 0 | -0.530397 | 0.153115  | 2.413577  |
| C  | 0 | -1.777275 | 0.582695  | -0.699143 |

|   |   |           |           |           |
|---|---|-----------|-----------|-----------|
| C | 0 | -1.249115 | -1.497380 | -0.999153 |
| I | 0 | 1.169234  | 0.038719  | 3.847219  |
| C | 0 | -3.208215 | 0.593798  | -1.269804 |
| C | 0 | -1.460092 | 2.017308  | -0.258391 |
| H | 0 | 3.650090  | 1.017006  | 0.507164  |
| H | 0 | 1.123069  | 0.968423  | 0.665067  |
| H | 0 | 5.810674  | -0.086951 | 0.419623  |
| H | 0 | 4.990141  | -1.741812 | 0.392883  |
| H | 0 | -0.083753 | -1.652169 | 1.391466  |
| H | 0 | 1.290662  | -0.667880 | -1.807558 |
| H | 0 | 1.026931  | 1.051203  | -1.586917 |
| H | 0 | -2.431628 | -0.944829 | 0.875336  |
| H | 0 | -0.913087 | -0.038062 | -2.725555 |
| H | 0 | -0.680144 | 1.222845  | 2.276148  |
| H | 0 | -1.362335 | -0.267333 | 2.978658  |
| H | 0 | -0.498570 | -2.286152 | -0.882556 |
| H | 0 | -2.136262 | -1.923626 | -1.471592 |
| H | 0 | -3.275157 | 1.284960  | -2.119446 |
| H | 0 | -3.546588 | -0.386977 | -1.615858 |
| H | 0 | -3.919956 | 0.937498  | -0.508354 |
| H | 0 | -2.153974 | 2.344842  | 0.526704  |
| H | 0 | -0.444250 | 2.157325  | 0.115686  |
| H | 0 | -1.590367 | 2.704228  | -1.104820 |

Energy + ZPE = -964.852523  
Free energy = -964.898607  
Free energy in DCM = -965.146774  
Free energy in heptane = -965.144437  
Number of imaginary frequencies = 0

#### Vinylborane 22a

|    |   |           |           |           |
|----|---|-----------|-----------|-----------|
| Cl | 0 | 1.445446  | -2.486408 | -0.906736 |
| B  | 0 | 1.551525  | -0.702601 | -0.669514 |
| C  | 0 | 2.983006  | -0.150917 | -0.447831 |
| C  | 0 | 0.244378  | 0.166207  | -0.831883 |
| C  | 0 | 3.261076  | 1.144484  | -0.225022 |
| C  | 0 | -1.034438 | -0.367529 | -0.090662 |
| C  | 0 | 0.036403  | 0.404576  | -2.385894 |
| C  | 0 | -2.295489 | -0.261842 | -0.972927 |
| C  | 0 | -1.432452 | 0.302210  | -2.824332 |
| C  | 0 | -1.228056 | 0.295339  | 1.296513  |
| C  | 0 | -2.401784 | 1.047613  | -1.844745 |
| C  | 0 | -2.007030 | -1.035013 | -2.289999 |
| C  | 0 | -0.045390 | 0.161847  | 2.235905  |
| C  | 0 | -3.814596 | 1.195026  | -2.440197 |
| C  | 0 | -2.000780 | 2.424007  | -1.299352 |
| C  | 0 | 0.632447  | 1.295174  | 2.704941  |
| C  | 0 | 0.400707  | -1.098292 | 2.665089  |
| C  | 0 | 1.492031  | -1.219541 | 3.525876  |
| C  | 0 | 1.723916  | 1.179570  | 3.568091  |
| C  | 0 | 2.159175  | -0.080046 | 3.980391  |
| H  | 0 | 3.821363  | -0.848567 | -0.467492 |
| H  | 0 | 0.464293  | 1.148544  | -0.400628 |
| H  | 0 | 4.277231  | 1.504317  | -0.072381 |
| H  | 0 | 2.483254  | 1.902998  | -0.177099 |
| H  | 0 | -0.905520 | -1.442052 | 0.092988  |

|   |   |           |           |           |
|---|---|-----------|-----------|-----------|
| H | 0 | 0.602396  | -0.327035 | -2.978657 |
| H | 0 | 0.450906  | 1.386592  | -2.644231 |
| H | 0 | -3.188691 | -0.542131 | -0.398819 |
| H | 0 | -1.530085 | 0.521640  | -3.895564 |
| H | 0 | -1.465733 | 1.357815  | 1.172981  |
| H | 0 | -2.112866 | -0.163958 | 1.760587  |
| H | 0 | -1.313247 | -1.879494 | -2.220568 |
| H | 0 | -2.907400 | -1.363454 | -2.813408 |
| H | 0 | -3.818251 | 1.949598  | -3.237233 |
| H | 0 | -4.205180 | 0.266196  | -2.864981 |
| H | 0 | -4.521644 | 1.526924  | -1.669071 |
| H | 0 | -2.696094 | 2.749724  | -0.515079 |
| H | 0 | -0.992097 | 2.463383  | -0.885407 |
| H | 0 | -2.052810 | 3.171363  | -2.102350 |
| H | 0 | 0.295391  | 2.282032  | 2.394309  |
| H | 0 | -0.113315 | -1.994155 | 2.324679  |
| H | 0 | 1.819513  | -2.205937 | 3.844036  |
| H | 0 | 2.231327  | 2.074498  | 3.919624  |
| H | 0 | 3.008298  | -0.174146 | 4.652076  |

Energy + ZPE = -1185.040509

Free energy = -1185.089684

Free energy in DCM = -1185.414037

Free energy in heptane = -1185.416246

Number of imaginary frequencies = 0

|   |   |           |           |           |
|---|---|-----------|-----------|-----------|
| H | 0 | -1.105830 | -2.073135 | 0.325846  |
| H | 0 | -3.198194 | -1.041376 | -0.238873 |
| H | 0 | -2.410401 | 0.569055  | -0.516652 |
| H | 0 | -0.495411 | 1.720588  | -0.153662 |
| H | 0 | 2.450384  | -0.703268 | -0.615552 |
| H | 0 | 1.231018  | 0.851075  | -2.526470 |
| H | 0 | -0.526838 | 0.894776  | -2.505742 |
| H | 0 | 1.644555  | 1.852784  | 1.131546  |
| H | 0 | 2.548786  | 1.445071  | -0.316630 |
| H | 0 | 2.170557  | -1.239876 | 1.798626  |
| H | 0 | 1.139311  | -2.604877 | 1.385686  |
| H | 0 | 1.157476  | -1.911153 | -2.369662 |
| H | 0 | 0.524368  | -3.015363 | -1.159853 |
| H | 0 | 0.426227  | 2.933740  | -3.597620 |
| H | 0 | -0.510827 | 3.346575  | -2.163924 |
| H | 0 | 2.569121  | 3.895791  | 0.032687  |
| H | 0 | 0.808626  | 3.93658   | 0.071546  |
| H | 0 | 3.473328  | -2.677458 | -1.926845 |
| H | 0 | 2.447795  | -4.052225 | -2.328177 |
| H | 0 | 4.089159  | -2.270052 | 0.624355  |
| H | 0 | 3.448576  | -3.387294 | 1.826218  |
| H | 0 | 2.544843  | 3.160817  | -2.333754 |
| H | 0 | 1.604699  | 4.641195  | -2.17103  |
| H | 0 | 2.225598  | -4.641195 | 0.070672  |
| H | 0 | 3.931776  | -4.544762 | -0.355961 |

Energy + ZPE = -767.013956

Free energy = -767.062266

Free energy in DCM = -767.471641

Free energy in heptane = -767.475698

Number of imaginary frequencies = 1 (-426.56)

## Diels-Alder reaction with Vinylborane (10)

### TS 10+cpN

|   |   |           |           |           |
|---|---|-----------|-----------|-----------|
| C | 0 | -0.915637 | -0.507129 | 2.626091  |
| C | 0 | -0.985131 | 0.880636  | 2.577049  |
| C | 0 | -2.326612 | -1.030609 | 2.567725  |
| C | 0 | -2.264660 | 1.262568  | 2.140424  |
| C | 0 | -3.011102 | 0.106919  | 1.832245  |
| H | 0 | -0.071912 | -1.083591 | 2.984584  |
| H | 0 | -0.157602 | 1.557840  | 2.757523  |
| H | 0 | -2.455824 | -2.026215 | 2.141694  |
| H | 0 | -2.723552 | -1.051976 | 3.597620  |
| H | 0 | -2.577985 | 2.281267  | 1.936339  |
| H | 0 | -4.089159 | 0.131712  | 1.697842  |
| C | 0 | -1.076502 | -1.000110 | 0.125176  |
| B | 0 | 0.290365  | -0.359923 | -0.184042 |
| C | 0 | -2.340477 | -0.401443 | -0.032699 |
| C | 0 | 0.395278  | 1.196002  | -0.537811 |
| C | 0 | 1.581426  | -1.307073 | -0.307486 |
| C | 0 | 0.367901  | 1.372154  | -2.084461 |
| C | 0 | 1.628434  | 1.932576  | 0.035776  |
| C | 0 | 1.980805  | -1.995225 | 1.023395  |
| C | 0 | 1.392096  | -2.386724 | -1.407659 |
| C | 0 | 0.411912  | 2.851573  | -2.502280 |
| C | 0 | 1.669248  | 3.414002  | -0.373077 |
| C | 0 | 2.630520  | -3.284695 | -1.563872 |
| C | 0 | 3.218204  | -2.895282 | 0.871319  |
| C | 0 | 1.623428  | 3.577437  | -1.899526 |
| C | 0 | 3.021162  | -3.943698 | -0.232958 |

### TS 10+cpX

|   |   |           |           |           |
|---|---|-----------|-----------|-----------|
| C | 0 | 3.712156  | 1.006260  | 2.588110  |
| C | 0 | 3.712156  | 2.412362  | 2.588110  |
| C | 0 | 2.398621  | 0.549769  | 2.588110  |
| C | 0 | 2.384036  | 2.871534  | 2.495167  |
| C | 0 | 1.513950  | 1.712052  | 2.940005  |
| H | 0 | 4.594864  | 0.379646  | 2.513430  |
| H | 0 | 4.596855  | 3.037770  | 2.524372  |
| H | 0 | 2.094904  | -0.487496 | 2.657954  |
| H | 0 | 2.105002  | 3.903817  | 2.688197  |
| H | 0 | 0.504957  | 1.685426  | 2.530761  |
| H | 0 | 1.431430  | 1.758894  | 4.039861  |
| C | 0 | 2.070111  | 1.314982  | 0.168283  |
| C | 0 | 1.950913  | 2.678573  | 0.485294  |
| B | 0 | 0.927773  | 0.315666  | -0.089827 |
| C | 0 | 1.272167  | -1.064759 | -0.835273 |
| C | 0 | -0.603158 | 0.669428  | 0.218754  |
| C | 0 | 2.287066  | -1.964359 | -0.085416 |
| C | 0 | 1.794101  | -0.788580 | -2.273537 |
| C | 0 | -1.312652 | -0.372706 | 1.120483  |
| C | 0 | -1.395698 | 0.829212  | -1.108990 |
| C | 0 | 2.603940  | -3.258650 | -0.853460 |
| C | 0 | 2.107131  | -2.082767 | -3.042292 |
| C | 0 | -2.792501 | -0.029519 | 1.359914  |



|     |           |           |           |
|-----|-----------|-----------|-----------|
| C 0 | -2.875364 | 1.172199  | -0.870771 |
| C 0 | 3.102021  | -2.965993 | -2.276137 |
| C 0 | -3.554785 | 0.137292  | 0.037345  |
| H 0 | 3.079248  | 1.004516  | -0.107061 |
| H 0 | 2.708997  | 3.375038  | 0.134865  |
| H 0 | 0.957135  | 3.120737  | 0.54244   |
| H 0 | 0.352346  | -1.661759 | -0.949987 |
| H 0 | -0.679111 | 1.641203  | 0.735169  |
| H 0 | 1.902143  | -2.218842 | 0.911883  |
| H 0 | 3.221496  | -1.407857 | 0.078740  |
| H 0 | 1.062114  | -0.193681 | -2.836127 |
| H 0 | 2.705675  | -0.175857 | -2.217610 |
| H 0 | -0.795200 | -0.457751 | 2.086489  |
| H 0 | -1.249496 | -1.366153 | 0.652996  |
| H 0 | -1.336488 | -0.106675 | -1.683889 |
| H 0 | -0.932309 | 1.604648  | -1.733814 |
| H 0 | 1.694310  | -3.875080 | -0.910346 |
| H 0 | 3.348061  | -3.851821 | -0.304530 |
| H 0 | 1.173653  | -2.643429 | -3.200390 |
| H 0 | 2.500298  | -1.844103 | -4.039861 |
| H 0 | -2.857758 | 0.907289  | 1.933902  |
| H 0 | -3.266242 | -0.805608 | 1.976079  |
| H 0 | -3.405469 | 1.242364  | -1.830202 |
| H 0 | -2.945141 | 2.165415  | -0.402390 |
| H 0 | 3.278948  | -3.903817 | -2.819121 |
| H 0 | 4.072626  | -2.450206 | -2.219679 |
| H 0 | -4.596855 | 0.423763  | 0.230909  |
| H 0 | -3.588967 | -0.831704 | -0.482997 |

Energy + ZPE = -767.013791

Free energy = -767.062128

Free energy in DCM = -767.471297

Free energy in heptane = -767.475368

Number of imaginary frequencies = 1 (-422.46)

**Product 10+cpN**

|     |           |           |           |
|-----|-----------|-----------|-----------|
| C 0 | 0.000000  | 0.000000  | 0.000000  |
| C 0 | 0.000000  | 1.519837  | 0.000000  |
| C 0 | -1.525070 | -0.267578 | 0.000000  |
| C 0 | 0.355972  | -0.513595 | -1.477035 |
| C 0 | -1.068329 | 1.924958  | -0.701950 |
| C 0 | -1.790909 | 0.679535  | -1.191131 |
| B 0 | 1.825470  | -0.144638 | -1.955795 |
| C 0 | -0.867767 | 0.037293  | -2.289810 |
| C 0 | 2.168838  | 1.278031  | -2.583709 |
| C 0 | 2.969604  | -1.253326 | -1.843399 |
| C 0 | 2.516113  | 1.122895  | -4.092208 |
| C 0 | 3.326004  | 2.015473  | -1.861068 |
| C 0 | 3.109695  | -1.869995 | -0.427688 |
| C 0 | 2.727051  | -2.390152 | -2.878524 |
| C 0 | 2.842300  | 2.473862  | -4.750656 |
| C 0 | 3.652542  | 3.366288  | -2.519546 |
| C 0 | 3.824234  | -3.466003 | -2.821151 |
| C 0 | 4.207428  | -2.944580 | -0.368591 |
| C 0 | 3.973724  | 3.203431  | -4.012176 |
| C 0 | 3.972809  | -4.049804 | -1.408752 |

|     |           |           |           |
|-----|-----------|-----------|-----------|
| H 0 | 0.588882  | -0.482971 | 0.782898  |
| H 0 | 0.789535  | 2.141999  | 0.410523  |
| H 0 | -1.785034 | -1.314254 | -0.199020 |
| H 0 | -2.012009 | 0.066635  | 0.922120  |
| H 0 | 0.258392  | -1.606155 | -1.418228 |
| H 0 | -1.321579 | 2.941925  | -0.986007 |
| H 0 | -2.829788 | 0.815323  | -1.502731 |
| H 0 | -1.388718 | -0.779907 | -2.802627 |
| H 0 | -0.590973 | 0.774231  | -3.050476 |
| H 0 | 1.288589  | 1.934754  | -2.527511 |
| H 0 | 3.947052  | -0.810867 | -2.095016 |
| H 0 | 3.382538  | 0.454514  | -4.203201 |
| H 0 | 1.685898  | 0.644013  | -4.629791 |
| H 0 | 3.072372  | 2.175507  | -0.804092 |
| H 0 | 4.229295  | 1.388672  | -1.868805 |
| H 0 | 3.325638  | -1.084655 | 0.309739  |
| H 0 | 2.153717  | -2.322067 | -0.125381 |
| H 0 | 2.670776  | -1.978317 | -3.895004 |
| H 0 | 1.753448  | -2.863144 | -2.683334 |
| H 0 | 3.111511  | 2.322800  | -5.804596 |
| H 0 | 1.940414  | 3.103577  | -4.744538 |
| H 0 | 4.493500  | 3.844788  | -2.000045 |
| H 0 | 2.790634  | 4.040467  | -2.406540 |
| H 0 | 4.780899  | -3.021164 | -3.132415 |
| H 0 | 3.602936  | -4.265091 | -3.541336 |
| H 0 | 5.183578  | -2.472885 | -0.555496 |
| H 0 | 4.258133  | -3.376892 | 0.639634  |
| H 0 | 4.904663  | 2.626633  | -4.119644 |
| H 0 | 4.159317  | 4.182953  | -4.471679 |
| H 0 | 3.056366  | -4.600799 | -1.148666 |
| H 0 | 4.792450  | -4.779586 | -1.382476 |

Energy + ZPE = -767.059079

Free energy = -767.106476

Free energy in DCM = -767.520853

Free energy in heptane = -767.525416

Number of imaginary frequencies = 0

**Product 10+cpX**

|     |           |           |           |
|-----|-----------|-----------|-----------|
| C 0 | 0.000000  | 0.000000  | 0.000000  |
| C 0 | 0.000000  | 1.341445  | 0.000000  |
| C 0 | -1.449883 | -0.457480 | 0.000000  |
| C 0 | -1.449648 | 1.797722  | 0.001996  |
| C 0 | -1.993218 | -0.108236 | -1.475859 |
| C 0 | -2.089353 | 0.669471  | 0.841366  |
| C 0 | -2.040670 | 1.455491  | -1.412827 |
| B 0 | -3.330124 | -0.902024 | -1.805100 |
| C 0 | -3.232400 | -2.206311 | -2.720467 |
| C 0 | -4.755177 | -0.462209 | -1.240867 |
| C 0 | -2.139144 | -3.217019 | -2.290780 |
| C 0 | -2.996453 | -1.783333 | -4.200604 |
| C 0 | -5.258396 | -1.490845 | -0.188173 |
| C 0 | -5.823072 | -0.293167 | -2.354432 |
| C 0 | -2.065435 | -4.429059 | -3.233392 |
| C 0 | -2.921493 | -2.996552 | -5.142485 |
| C 0 | -6.639259 | -1.116313 | 0.375900  |

|     |           |           |           |
|-----|-----------|-----------|-----------|
| C 0 | -7.200893 | 0.083048  | -1.785279 |
| C 0 | -1.849316 | -3.998687 | -4.691423 |
| C 0 | -7.677412 | -0.936293 | -0.740804 |
| H 0 | 0.854554  | -0.660313 | -0.113949 |
| H 0 | 0.857793  | 1.998595  | -0.106285 |
| H 0 | -1.626327 | -1.485509 | 0.325685  |
| H 0 | -1.632787 | 2.826081  | 0.324462  |
| H 0 | -1.211181 | -0.416856 | -2.178812 |
| H 0 | -3.183738 | 0.675212  | 0.824095  |
| H 0 | -1.738222 | 0.662364  | 1.878269  |
| H 0 | -1.462675 | 1.915791  | -2.220673 |
| H 0 | -3.064390 | 1.841432  | -1.483187 |
| H 0 | -4.191660 | -2.749112 | -2.703715 |
| H 0 | -4.687936 | 0.508710  | -0.726063 |
| H 0 | -2.325307 | -3.562611 | -1.264664 |
| H 0 | -1.158900 | -2.718943 | -2.274787 |
| H 0 | -3.792574 | -1.106294 | -4.538298 |
| H 0 | -2.056833 | -1.216104 | -4.274357 |
| H 0 | -4.537892 | -1.576747 | 0.636760  |
| H 0 | -5.319966 | -2.487552 | -0.649080 |
| H 0 | -5.916532 | -1.229696 | -2.922684 |
| H 0 | -5.501523 | 0.472620  | -3.073523 |
| H 0 | -3.003025 | -5.000126 | -3.160304 |
| H 0 | -1.262294 | -5.106631 | -2.914358 |
| H 0 | -3.900710 | -3.497459 | -5.161824 |
| H 0 | -2.721539 | -2.661599 | -6.169084 |
| H 0 | -6.553690 | -0.179000 | 0.945440  |
| H 0 | -6.973748 | -1.883717 | 1.086679  |
| H 0 | -7.933871 | 0.164917  | -2.598875 |
| H 0 | -7.139695 | 1.077556  | -1.318835 |
| H 0 | -1.845881 | -4.875439 | -5.352041 |
| H 0 | -0.857042 | -3.532353 | -4.787212 |
| H 0 | -8.642267 | -0.627577 | -0.318042 |
| H 0 | -7.848011 | -1.905087 | -1.234135 |

Energy + ZPE = -767.058909  
Free energy = -767.106350  
Free energy in DCM = -767.520813  
Free energy in heptane = -767.525343  
Number of imaginary frequencies = 0

### Diels-Alder reaction with Vinylborane (11a)

#### TS 11a+cpN

|      |           |           |           |
|------|-----------|-----------|-----------|
| C 0  | 2.074846  | 1.437986  | -0.362010 |
| C 0  | 2.074846  | 2.975005  | -0.362010 |
| C 0  | 0.633990  | 0.854261  | -0.362010 |
| C 0  | 1.262768  | 3.540620  | -1.536107 |
| C 0  | -0.166766 | 1.439569  | -1.549511 |
| B 0  | 0.675658  | -0.728914 | -0.296493 |
| C 0  | -0.165540 | 2.976398  | -1.550224 |
| Cl 0 | 1.165702  | -1.622884 | -1.805285 |
| C 0  | 0.438121  | -1.532228 | 0.969477  |
| C 0  | 0.551129  | -2.924114 | 1.122105  |
| H 0  | 2.607562  | 1.075229  | -1.252458 |

|     |           |           |           |
|-----|-----------|-----------|-----------|
| H 0 | 2.634052  | 1.065739  | 0.506658  |
| H 0 | 3.106384  | 3.350081  | -0.397829 |
| H 0 | 1.643608  | 3.336444  | 0.583717  |
| H 0 | 0.150405  | 1.203384  | 0.566780  |
| H 0 | 1.763550  | 3.277828  | -2.479933 |
| H 0 | 1.239285  | 4.637346  | -1.490301 |
| H 0 | 0.268376  | 1.074984  | -2.489961 |
| H 0 | -1.201483 | 1.070094  | -1.526696 |
| H 0 | -0.705828 | 3.340616  | -0.663193 |
| H 0 | -0.713478 | 3.353019  | -2.424238 |
| H 0 | 0.217078  | -0.962025 | 1.873148  |
| H 0 | 0.704683  | -3.329712 | 2.121318  |
| H 0 | 1.048766  | -3.490333 | 0.340391  |
| C 0 | -2.006394 | -2.327285 | -0.770191 |
| C 0 | -1.584196 | -3.625708 | -0.436127 |
| C 0 | -2.098280 | -1.568913 | 0.388753  |
| C 0 | -1.328657 | -3.691051 | 0.948788  |
| C 0 | -2.070366 | -2.514111 | 1.559332  |
| H 0 | -2.139649 | -1.954996 | -1.779313 |
| H 0 | -1.355013 | -4.408709 | -1.150891 |
| H 0 | -2.438375 | -0.541488 | 0.447428  |
| H 0 | -1.231366 | -4.637346 | 1.474001  |
| H 0 | -3.106384 | -2.837677 | 1.759962  |
| H 0 | -1.662634 | -2.117743 | 2.489961  |

Energy + ZPE = -992.147909  
Free energy = -992.190370  
Free energy in DCM = -992.451907  
Free energy in heptane = -992.452819  
Number of imaginary frequencies = 1 (-404.86)

#### TS 11a+cpX

|      |           |           |           |
|------|-----------|-----------|-----------|
| C 0  | -1.094232 | 0.174633  | 0.430982  |
| C 0  | -1.094232 | 1.722814  | 0.430982  |
| C 0  | -2.557899 | -0.349499 | 0.430982  |
| B 0  | -0.260151 | -0.491810 | -0.739929 |
| C 0  | -3.379035 | 0.231725  | 1.593306  |
| C 0  | -1.915820 | 2.302291  | 1.593625  |
| C 0  | 0.743027  | -1.610862 | -0.524162 |
| Cl 0 | -0.634435 | 0.053461  | -2.439895 |
| C 0  | -3.355255 | 1.766993  | 1.590141  |
| C 0  | 1.406964  | -2.384965 | -1.488387 |
| H 0  | -0.638861 | -0.153813 | 1.380654  |
| H 0  | -1.506081 | 2.083994  | -0.521080 |
| H 0  | -0.063871 | 2.101771  | 0.482922  |
| H 0  | -2.566594 | -1.446446 | 0.481129  |
| H 0  | -3.034920 | -0.078318 | -0.521346 |
| H 0  | -2.967247 | -0.134855 | 2.545653  |
| H 0  | -4.413607 | -0.132673 | 1.539938  |
| H 0  | -1.434085 | 2.035686  | 2.546544  |
| H 0  | -1.918437 | 3.399266  | 1.542205  |
| H 0  | 0.875547  | -1.927548 | 0.510968  |
| H 0  | -3.910063 | 2.158927  | 2.452667  |
| H 0  | -3.873916 | 2.133471  | 0.691769  |
| H 0  | 1.708001  | -3.399266 | -1.239129 |
| H 0  | 1.130274  | -2.254141 | -2.532717 |

|   |   |          |           |           |
|---|---|----------|-----------|-----------|
| C | 0 | 2.657434 | 0.145803  | -0.299488 |
| C | 0 | 3.408675 | -0.752594 | 0.448636  |
| C | 0 | 2.882392 | -0.159062 | -1.75118  |
| C | 0 | 3.302859 | -1.613811 | -1.674715 |
| C | 0 | 3.853204 | -1.790871 | -0.389508 |
| H | 0 | 2.235292 | 1.074081  | 0.067529  |
| H | 0 | 3.562934 | -0.703442 | 1.521507  |
| H | 0 | 2.052221 | 0.069245  | -2.419249 |
| H | 0 | 3.757035 | 0.422555  | -2.090613 |
| H | 0 | 3.666400 | -2.150676 | -2.546544 |
| H | 0 | 4.413607 | -2.661099 | -0.063086 |

Energy + ZPE = -992.147619

Free energy = -992.190174

Free energy in DCM = -992.450514

Free energy in heptane = -992.451956

Number of imaginary frequencies = 1 (-405.55)

#### Product 11a+cpN

|    |   |           |           |           |
|----|---|-----------|-----------|-----------|
| C  | 0 | 1.880995  | 0.829451  | -0.982607 |
| C  | 0 | 1.880995  | 2.366130  | -0.982607 |
| C  | 0 | 0.446285  | 0.254066  | -0.982607 |
| C  | 0 | 1.077098  | 2.931758  | -2.162511 |
| C  | 0 | -0.359056 | 0.834209  | -2.187065 |
| B  | 0 | 0.314408  | -1.313910 | -1.018212 |
| C  | 0 | -0.352304 | 2.371479  | -2.184894 |
| Cl | 0 | 1.445345  | -2.234845 | -2.078167 |
| C  | 0 | -0.735350 | -2.186624 | -0.237659 |
| C  | 0 | -0.083393 | -2.880188 | 1.050824  |
| C  | 0 | -2.000104 | -1.501308 | 0.380644  |
| C  | 0 | 0.357428  | -1.770081 | 1.993343  |
| C  | 0 | -1.947042 | -1.924548 | 1.891859  |
| C  | 0 | -1.369108 | -3.352649 | 1.768618  |
| C  | 0 | -0.749993 | -1.204093 | 2.495494  |
| H  | 0 | 2.419049  | 0.464686  | -1.867384 |
| H  | 0 | 2.434590  | 0.456617  | -0.110686 |
| H  | 0 | 2.912699  | 2.740081  | -1.013029 |
| H  | 0 | 1.445290  | 2.730006  | -0.039917 |
| H  | 0 | -0.056203 | 0.606779  | -0.068422 |
| H  | 0 | 1.582525  | 2.667067  | -3.103140 |
| H  | 0 | 1.054176  | 4.028284  | -2.118386 |
| H  | 0 | 0.086084  | 0.471128  | -3.124244 |
| H  | 0 | -1.394474 | 0.468197  | -2.171580 |
| H  | 0 | -0.898321 | 2.732367  | -1.300747 |
| H  | 0 | -0.895265 | 2.746035  | -3.062669 |
| H  | 0 | -1.050597 | -3.013073 | -0.888106 |
| H  | 0 | 0.664133  | -3.635221 | 0.800827  |
| H  | 0 | -2.912699 | -1.880913 | -0.093287 |
| H  | 0 | -2.007517 | -0.412409 | 0.274035  |
| H  | 0 | 1.384336  | -1.445371 | 2.133141  |
| H  | 0 | -2.896147 | -1.811051 | 2.421590  |
| H  | 0 | -1.162360 | -3.811294 | 2.741024  |
| H  | 0 | -1.984358 | -4.028284 | 1.162440  |
| H  | 0 | -0.810038 | -0.320887 | 3.124244  |

Energy + ZPE = -992.191002

Free energy = -992.233115  
 Free energy in DCM = -992.506733  
 Free energy in heptane = -992.499680  
 Number of imaginary frequencies = 0

#### Product 11a+cpX

|    |   |           |           |           |
|----|---|-----------|-----------|-----------|
| C  | 0 | 0.000000  | 0.000000  | 0.000000  |
| C  | 0 | 0.000000  | 1.544387  | 0.000000  |
| C  | 0 | -1.467556 | -0.530311 | 0.000000  |
| B  | 0 | 0.780386  | -0.719060 | -1.167276 |
| C  | 0 | -2.279112 | 0.049250  | 1.170429  |
| C  | 0 | -0.811794 | 2.118359  | 1.171990  |
| C  | 0 | 1.560580  | -2.061196 | -0.924430 |
| Cl | 0 | 0.745953  | 0.028775  | -2.800986 |
| C  | 0 | -2.251754 | 1.584618  | 1.175300  |
| C  | 0 | 3.065156  | -1.740339 | -0.441128 |
| C  | 0 | 1.819757  | -3.056186 | -2.098870 |
| C  | 0 | 3.559573  | -3.029340 | 0.194666  |
| C  | 0 | 3.379604  | -3.235394 | -2.099657 |
| C  | 0 | 3.818279  | -1.785840 | -1.788544 |
| C  | 0 | 3.748260  | -3.917639 | -0.791928 |
| H  | 0 | 0.449520  | -0.339508 | 0.948939  |
| H  | 0 | -0.422450 | 1.905615  | -0.946928 |
| H  | 0 | 1.030271  | 1.922051  | 0.039108  |
| H  | 0 | -1.480945 | -1.627544 | 0.046436  |
| H  | 0 | -1.950137 | -0.250887 | -0.947480 |
| H  | 0 | -3.314059 | -0.313641 | 1.118973  |
| H  | 0 | -1.862236 | -0.325240 | 2.116919  |
| H  | 0 | -0.322854 | 1.847590  | 2.119913  |
| H  | 0 | -0.813652 | 3.215054  | 1.125300  |
| H  | 0 | 1.059386  | -2.568426 | -0.089729 |
| H  | 0 | -2.776219 | 1.956957  | 0.282768  |
| H  | 0 | -2.800800 | 1.970432  | 2.043759  |
| H  | 0 | 3.169237  | -0.835451 | 0.163115  |
| H  | 0 | 1.296932  | -4.006723 | -1.953856 |
| H  | 0 | 1.495847  | -2.640060 | -3.057879 |
| H  | 0 | 3.618510  | -3.205243 | 1.264490  |
| H  | 0 | 3.773009  | -3.691827 | -3.011315 |
| H  | 0 | 3.462864  | -1.054114 | -2.521483 |
| H  | 0 | 4.900933  | -1.688323 | -1.660850 |
| H  | 0 | 4.001451  | -4.968436 | -0.689418 |

Energy + ZPE = -992.191066

Free energy = -992.233223

Free energy in DCM = -992.497432

Free energy in heptane = -992.499930

Number of imaginary frequencies = 0

#### Diels-Alder reaction with Vinylborane (11b)

##### TS 11b+cpN

|   |   |          |          |           |
|---|---|----------|----------|-----------|
| C | 0 | 2.098968 | 1.480191 | -0.329394 |
| C | 0 | 2.128553 | 3.014505 | -0.410418 |

|    |   |           |           |           |
|----|---|-----------|-----------|-----------|
| C  | 0 | 0.652579  | 0.924131  | -0.208832 |
| C  | 0 | 1.252329  | 3.537903  | -1.557485 |
| C  | 0 | -0.219654 | 1.476899  | -1.363766 |
| B  | 0 | 0.665585  | -0.654516 | -0.111167 |
| C  | 0 | -0.185214 | 3.010821  | -1.442854 |
| Br | 0 | 1.194491  | -1.638029 | -1.746609 |
| C  | 0 | 0.388367  | -1.473987 | 1.128693  |
| C  | 0 | 0.511576  | -2.869772 | 1.250105  |
| H  | 0 | 2.565878  | 1.056358  | -1.229343 |
| H  | 0 | 2.704871  | 1.140873  | 0.521419  |
| H  | 0 | 3.163030  | 3.362315  | -0.532712 |
| H  | 0 | 1.768380  | 3.435040  | 0.540567  |
| H  | 0 | 0.235014  | 1.309627  | 0.737237  |
| H  | 0 | 1.680820  | 3.210873  | -2.516522 |
| H  | 0 | 1.256837  | 4.635733  | -1.570849 |
| H  | 0 | 0.137217  | 1.051483  | -2.311432 |
| H  | 0 | -1.257816 | 1.135807  | -1.246626 |
| H  | 0 | -0.653083 | 3.432223  | -0.540206 |
| H  | 0 | -0.785952 | 3.356347  | -2.294856 |
| H  | 0 | 0.116524  | -0.927438 | 2.033552  |
| H  | 0 | 0.616778  | -3.298366 | 2.246197  |
| H  | 0 | 1.070291  | -3.398930 | 0.483761  |
| C  | 0 | -1.978373 | -2.263668 | -0.757911 |
| C  | 0 | -1.510947 | -3.555698 | -0.456497 |
| C  | 0 | -2.165312 | -1.563536 | 0.423308  |
| C  | 0 | -1.316759 | -3.669588 | 0.935857  |
| C  | 0 | -2.136920 | -2.550352 | 1.557829  |
| H  | 0 | -2.075417 | -1.855208 | -1.756801 |
| H  | 0 | -1.213345 | -4.295439 | -1.191525 |
| H  | 0 | -2.544983 | -0.551874 | 0.507361  |
| H  | 0 | -1.215676 | -4.635733 | 1.423151  |
| H  | 0 | -3.163030 | -2.927631 | 1.708708  |
| H  | 0 | -1.782181 | -2.169604 | 2.516522  |

Energy + ZPE = -3103.658833  
Free energy = -3103.702473  
Free energy in DCM = -3103.962277  
Free energy in heptane = -3103.963437  
Number of imaginary frequencies = 1 (-394.40)

**TS 11b+cpX**

|    |   |           |           |           |
|----|---|-----------|-----------|-----------|
| C  | 0 | -1.112507 | 0.117410  | 0.516418  |
| C  | 0 | -1.045373 | 1.665884  | 0.506949  |
| C  | 0 | -2.595242 | -0.344636 | 0.461565  |
| B  | 0 | -0.262160 | -0.563694 | -0.630149 |
| C  | 0 | -3.444694 | 0.289570  | 1.573715  |
| C  | 0 | -1.897836 | 2.295581  | 1.619099  |
| C  | 0 | 0.784032  | -1.637356 | -0.429378 |
| Br | 0 | -0.704203 | -0.012281 | -2.483405 |
| C  | 0 | -3.356730 | 1.822271  | 1.549153  |
| C  | 0 | 1.441066  | -2.385366 | -1.421415 |
| H  | 0 | -0.698838 | -0.227312 | 1.479498  |
| H  | 0 | -1.387561 | 2.029519  | -0.471250 |
| H  | 0 | -0.002781 | 1.998163  | 0.609921  |
| H  | 0 | -2.651226 | -1.439338 | 0.528957  |
| H  | 0 | -3.012918 | -0.073803 | -0.518066 |

|   |   |           |           |           |
|---|---|-----------|-----------|-----------|
| H | 0 | -3.095535 | -0.076948 | 2.550781  |
| H | 0 | -4.489779 | -0.033110 | 1.475320  |
| H | 0 | -1.476460 | 2.022380  | 2.598443  |
| H | 0 | -1.849670 | 3.390783  | 1.553949  |
| H | 0 | 0.961948  | -1.945309 | 0.601763  |
| H | 0 | -3.937380 | 2.251184  | 2.376355  |
| H | 0 | -3.812561 | 2.195283  | 0.619901  |
| H | 0 | 1.783070  | -3.390783 | -1.189061 |
| H | 0 | 1.104429  | -2.263557 | -2.449430 |
| C | 0 | 2.715165  | 0.173323  | -0.255821 |
| C | 0 | 3.504190  | -0.737035 | 0.433811  |
| C | 0 | 2.848374  | -0.106714 | -1.722047 |
| C | 0 | 3.283135  | -1.560228 | -1.697731 |
| C | 0 | 3.907455  | -1.756070 | -0.448510 |
| H | 0 | 2.297453  | 1.085921  | 0.153060  |
| H | 0 | 3.716420  | -0.708460 | 1.497460  |
| H | 0 | 1.973245  | 0.130730  | -2.327218 |
| H | 0 | 3.695335  | 0.485642  | -2.109846 |
| H | 0 | 3.611202  | -2.071993 | -2.598443 |
| H | 0 | 4.489779  | -2.628857 | -0.170733 |

Energy + ZPE = -3103.658734  
Free energy = -3103.702282  
Free energy in DCM = -3103.961258  
Free energy in heptane = -3103.962831  
Number of imaginary frequencies = 1 (-401.21)

**Product 11b+cpN**

|    |   |           |           |           |
|----|---|-----------|-----------|-----------|
| C  | 0 | 1.944383  | 1.563171  | -0.040738 |
| C  | 0 | 1.995955  | 3.099015  | -0.022509 |
| C  | 0 | 0.495115  | 1.033996  | -0.257022 |
| C  | 0 | 1.380581  | 3.701714  | -1.293572 |
| C  | 0 | -0.107238 | 1.658374  | -1.540374 |
| B  | 0 | 0.496466  | -0.542548 | -0.228042 |
| C  | 0 | -0.051276 | 3.193327  | -1.515988 |
| Br | 0 | 1.251323  | -1.456406 | -1.771925 |
| C  | 0 | -0.078210 | -1.377222 | 0.966865  |
| C  | 0 | 0.294122  | -2.880047 | 1.168230  |
| C  | 0 | -2.053208 | -2.225950 | -0.352195 |
| C  | 0 | -1.708534 | -3.504707 | -0.145858 |
| C  | 0 | -1.682514 | -1.446526 | 0.899923  |
| C  | 0 | -1.099722 | -3.598608 | 1.244987  |
| C  | 0 | -1.934944 | -2.525091 | 1.978991  |
| H  | 0 | 2.582322  | 1.182786  | -0.850398 |
| H  | 0 | 2.360868  | 1.167156  | 0.895557  |
| H  | 0 | 3.035411  | 3.433226  | 0.093009  |
| H  | 0 | 1.448830  | 3.468954  | 0.857252  |
| H  | 0 | -0.105190 | 1.384477  | 0.599688  |
| H  | 0 | 1.999844  | 3.425000  | -2.159653 |
| H  | 0 | 1.392643  | 4.797823  | -1.237875 |
| H  | 0 | 0.444539  | 1.282947  | -2.412014 |
| H  | 0 | -1.146480 | 1.326488  | -1.668299 |
| H  | 0 | -0.698422 | 3.568526  | -0.709049 |
| H  | 0 | -0.456551 | 3.596618  | -2.453129 |
| H  | 0 | 0.150162  | -0.813574 | 1.884488  |
| H  | 0 | 0.847111  | -3.018575 | 2.104676  |

|   |   |           |           |           |
|---|---|-----------|-----------|-----------|
| H | 0 | 0.909795  | -3.274843 | 0.356115  |
| H | 0 | -2.412433 | -1.783616 | -1.276136 |
| H | 0 | -1.729195 | -4.313825 | -0.869137 |
| H | 0 | -2.167611 | -0.476921 | 1.034927  |
| H | 0 | -1.064788 | -4.596035 | 1.690186  |
| H | 0 | -2.993113 | -2.793367 | 2.062911  |
| H | 0 | -1.540027 | -2.255735 | 2.966125  |

Energy + ZPE = -3103.699526

Free energy = -3103.742661

Free energy in DCM = -3104.005536

Free energy in heptane = -3104.008024

Number of imaginary frequencies = 0

#### Product 11b+cpX

|    |   |           |           |           |
|----|---|-----------|-----------|-----------|
| C  | 0 | -0.758240 | 0.631797  | 0.470650  |
| C  | 0 | -0.472117 | 2.153817  | 0.543246  |
| C  | 0 | -2.291019 | 0.385662  | 0.345236  |
| B  | 0 | 0.008983  | -0.114822 | -0.686243 |
| C  | 0 | -3.077055 | 1.077083  | 1.470259  |
| C  | 0 | -1.262872 | 2.836762  | 1.668991  |
| C  | 0 | 0.935405  | -1.357088 | -0.450574 |
| Br | 0 | -0.201215 | 0.612237  | -2.486965 |
| C  | 0 | -2.770818 | 2.580046  | 1.534735  |
| C  | 0 | 2.409800  | -0.839233 | -0.043906 |
| C  | 0 | 1.264077  | -2.335578 | -1.620671 |
| C  | 0 | 3.102618  | -2.044171 | 0.569555  |
| C  | 0 | 2.831207  | -2.297839 | -1.711151 |
| C  | 0 | 3.087807  | -0.798927 | -1.431360 |
| C  | 0 | 3.358492  | -2.909149 | -0.422852 |
| H  | 0 | -0.437066 | 0.185698  | 1.426913  |
| H  | 0 | -0.732061 | 2.611634  | -0.420108 |
| H  | 0 | 0.603017  | 2.328330  | 0.685888  |
| H  | 0 | -2.506114 | -0.691624 | 0.350297  |
| H  | 0 | -2.630281 | 0.765714  | -0.628201 |
| H  | 0 | -4.152864 | 0.913193  | 1.324586  |
| H  | 0 | -2.817616 | 0.611593  | 2.432669  |
| H  | 0 | -0.915451 | 2.456360  | 2.641223  |
| H  | 0 | -1.059153 | 3.915519  | 1.666124  |
| H  | 0 | 0.532281  | -1.898092 | 0.415397  |
| H  | 0 | -3.138376 | 3.062491  | 0.616965  |
| H  | 0 | -3.312708 | 3.042428  | 2.369760  |
| H  | 0 | 2.425112  | 0.078019  | 0.550383  |
| H  | 0 | 0.889811  | -3.345752 | -1.427282 |
| H  | 0 | 0.825782  | -1.990116 | -2.562028 |
| H  | 0 | 3.239140  | -2.199496 | 1.635444  |
| H  | 0 | 3.231911  | -2.708374 | -2.641223 |
| H  | 0 | 2.594083  | -0.128723 | -2.142322 |
| H  | 0 | 4.152864  | -0.555583 | -1.365466 |
| H  | 0 | 3.755301  | -3.915519 | -0.329829 |

Energy + ZPE = -3103.700722

Free energy = -3103.743630

Free energy in DCM = -3104.006578

Free energy in heptane = -3104.009330

Number of imaginary frequencies = 0

#### Diels-Alder reaction with Vinylborane (16a)

##### TS 16a+cpReN

|    |   |           |           |           |
|----|---|-----------|-----------|-----------|
| C  | 0 | -2.794353 | 1.195825  | 0.641502  |
| C  | 0 | -2.898677 | 1.912734  | -0.541722 |
| C  | 0 | -4.059651 | 0.399514  | 0.810585  |
| C  | 0 | -3.961735 | 1.392546  | -1.300889 |
| C  | 0 | -4.506168 | 0.275647  | -0.635956 |
| H  | 0 | -2.092713 | 1.394001  | 1.443088  |
| H  | 0 | -2.213269 | 2.683484  | -0.875082 |
| H  | 0 | -4.793272 | 1.034486  | 1.336629  |
| H  | 0 | -3.970374 | -0.532991 | 1.369416  |
| H  | 0 | -4.225217 | 1.712241  | -2.303337 |
| H  | 0 | -5.476273 | -0.137205 | -0.899138 |
| Cl | 0 | -0.751329 | 0.231914  | -2.616338 |
| C  | 0 | -2.062972 | -1.067194 | -0.421932 |
| C  | 0 | -3.253090 | -1.244849 | -1.147959 |
| B  | 0 | -0.768355 | -0.454237 | -0.929889 |
| C  | 0 | 0.602132  | -0.525110 | -0.134245 |
| C  | 0 | 1.524917  | 0.742901  | -0.190542 |
| C  | 0 | 3.015361  | 0.366025  | -0.331610 |
| C  | 0 | 3.474371  | -0.892814 | 0.498754  |
| C  | 0 | 2.855831  | -1.717153 | -0.681864 |
| C  | 0 | 1.329967  | -1.863652 | -0.566004 |
| C  | 0 | 1.252683  | 1.692561  | 0.985977  |
| C  | 0 | 5.010966  | -0.999778 | 0.527433  |
| C  | 0 | 3.153005  | -0.509806 | -1.608142 |
| C  | 0 | 2.984969  | -1.144522 | 1.930899  |
| H  | 0 | -2.033924 | -1.509953 | 0.574983  |
| H  | 0 | -3.948608 | -2.019167 | -0.826677 |
| H  | 0 | -3.229099 | -1.101381 | -2.224182 |
| H  | 0 | 0.323188  | -0.660157 | 0.918640  |
| H  | 0 | 1.286828  | 1.302838  | -1.104782 |
| H  | 0 | 3.646030  | 1.261899  | -0.252869 |
| H  | 0 | 3.320117  | -2.683484 | -0.919684 |
| H  | 0 | 1.070346  | -2.651480 | 0.152149  |
| H  | 0 | 0.965331  | -2.212009 | -1.541991 |
| H  | 0 | 1.477775  | 1.228853  | 1.952717  |
| H  | 0 | 1.861612  | 2.601390  | 0.902626  |
| H  | 0 | 0.200543  | 2.003141  | 1.003609  |
| H  | 0 | 5.476273  | -0.837733 | -0.448694 |
| H  | 0 | 5.432092  | -0.259087 | 1.219545  |
| H  | 0 | 5.319911  | -1.992500 | 0.879698  |
| H  | 0 | 2.434844  | -0.317409 | -2.412703 |
| H  | 0 | 4.159790  | -0.519484 | -2.031486 |
| H  | 0 | 3.384734  | -0.386018 | 2.616338  |
| H  | 0 | 1.899491  | -1.147274 | 2.036618  |
| H  | 0 | 3.350191  | -2.118555 | 2.283468  |

Energy + ZPE = -1148.055228

Free energy = -1148.102263

Free energy in DCM = -1148.444469

Free energy in heptane = -1148.446623

Number of imaginary frequencies = 1 (-408.09)

**TS 16a+cpReX**

|    |   |           |           |           |
|----|---|-----------|-----------|-----------|
| C  | 0 | -0.461590 | 2.380728  | 4.025915  |
| C  | 0 | 0.885909  | 2.775345  | 3.911077  |
| C  | 0 | -1.136259 | 2.820657  | 2.741014  |
| C  | 0 | 1.188893  | 2.990701  | 2.554199  |
| C  | 0 | 0.032406  | 2.835797  | 1.800646  |
| H  | 0 | -0.989690 | 2.371607  | 4.975453  |
| H  | 0 | 1.608954  | 2.776124  | 4.720500  |
| H  | 0 | -1.475085 | 3.861711  | 2.882474  |
| H  | 0 | -1.995694 | 2.231855  | 2.421225  |
| H  | 0 | 2.181231  | 3.171644  | 2.154435  |
| H  | 0 | -0.049989 | 2.996473  | 0.732286  |
| Cl | 0 | -2.593738 | -0.052984 | 1.134747  |
| C  | 0 | 0.047649  | 0.263053  | 2.250830  |
| C  | 0 | -0.400482 | 0.379395  | 3.576157  |
| B  | 0 | -0.775320 | -0.032290 | 1.006975  |
| C  | 0 | -0.117907 | -0.493378 | -0.359961 |
| C  | 0 | -0.793303 | -0.010022 | -1.691414 |
| C  | 0 | -0.836933 | -1.127962 | -2.754917 |
| C  | 0 | 0.443948  | -2.043945 | -2.824060 |
| C  | 0 | -0.197217 | -2.785976 | -1.601601 |
| C  | 0 | 0.065402  | -2.065453 | -0.269996 |
| C  | 0 | -0.154880 | 1.288054  | -2.209179 |
| C  | 0 | 0.428011  | -2.915117 | -4.094457 |
| C  | 0 | -1.585278 | -2.336583 | -2.126853 |
| C  | 0 | 1.859862  | -1.468313 | -2.695445 |
| H  | 0 | 1.129543  | 0.223548  | 2.118274  |
| H  | 0 | 0.263061  | 0.090519  | 4.387146  |
| H  | 0 | -1.451672 | 0.186758  | 3.781970  |
| H  | 0 | 0.895242  | -0.072266 | -0.352898 |
| H  | 0 | -1.845858 | 0.221911  | -1.481166 |
| H  | 0 | -1.209721 | -0.733781 | -3.709985 |
| H  | 0 | 0.000698  | -3.861711 | -1.504735 |
| H  | 0 | 1.078129  | -2.279895 | 0.093195  |
| H  | 0 | -0.619256 | -2.499836 | 0.471484  |
| H  | 0 | 0.899827  | 1.154035  | -2.473068 |
| H  | 0 | -0.678957 | 1.650686  | -3.102041 |
| H  | 0 | -0.207910 | 2.081685  | -1.452966 |
| H  | 0 | -0.539772 | -3.386933 | -4.285657 |
| H  | 0 | 0.678660  | -2.310113 | -4.975453 |
| H  | 0 | 1.176315  | -3.714915 | -4.020729 |
| H  | 0 | -2.346013 | -2.102188 | -1.374057 |
| H  | 0 | -2.018049 | -3.019251 | -2.861423 |
| H  | 0 | 2.105936  | -0.845079 | -3.564899 |
| H  | 0 | 2.013175  | -0.863762 | -1.800798 |
| H  | 0 | 2.593738  | -2.285099 | -2.668800 |

Energy + ZPE = -1148.055157

Free energy = -1148.102421

Free energy in DCM = -1148.442985

Free energy in heptane = -1148.445593

Number of imaginary frequencies = 1 (-407.95)

**TS 16a+cpSiN**

|   |   |          |           |          |
|---|---|----------|-----------|----------|
| C | 0 | 1.605870 | -1.592881 | 3.707809 |
|---|---|----------|-----------|----------|

|    |   |           |           |           |
|----|---|-----------|-----------|-----------|
| C  | 0 | 2.566864  | -0.670248 | 3.245462  |
| C  | 0 | 0.316028  | -0.803303 | 3.854212  |
| C  | 0 | 1.913080  | 0.440224  | 2.683727  |
| C  | 0 | 0.543013  | 0.287366  | 2.842772  |
| H  | 0 | 1.861715  | -2.396006 | 4.393638  |
| H  | 0 | 3.635390  | -0.851359 | 3.201016  |
| H  | 0 | 0.317120  | -0.342338 | 4.857046  |
| H  | 0 | -0.610295 | -1.369907 | 3.752885  |
| H  | 0 | 2.398646  | 1.236340  | 2.131348  |
| H  | 0 | -0.212132 | 1.004451  | 2.542527  |
| Cl | 0 | 2.425274  | -0.910911 | -0.395543 |
| C  | 0 | 0.263053  | -1.788222 | 1.272790  |
| C  | 0 | 1.093072  | -2.627226 | 2.035666  |
| B  | 0 | 0.673046  | -0.904559 | 0.109256  |
| C  | 0 | -0.339521 | -0.049189 | -0.762379 |
| C  | 0 | -0.597540 | -0.735386 | -2.162686 |
| C  | 0 | -0.754272 | 0.309061  | -3.288633 |
| C  | 0 | -1.552911 | 1.610477  | -2.895942 |
| C  | 0 | -0.197806 | 2.075518  | -2.259661 |
| C  | 0 | 0.038092  | 1.472572  | -0.864894 |
| C  | 0 | -1.758250 | -1.738380 | -2.089808 |
| C  | 0 | -1.909492 | 2.432615  | -4.149313 |
| C  | 0 | 0.531533  | 1.182247  | -3.296491 |
| C  | 0 | -2.815394 | 1.558308  | -2.026053 |
| H  | 0 | -0.801474 | -1.816232 | 1.510779  |
| H  | 0 | 0.637609  | -3.446760 | 2.590273  |
| H  | 0 | 2.084485  | -2.857035 | 1.656424  |
| H  | 0 | -1.296617 | -0.099921 | -0.228239 |
| H  | 0 | 0.296672  | -1.312973 | -2.438497 |
| H  | 0 | -1.047692 | -0.182905 | -4.225976 |
| H  | 0 | 0.014377  | 3.152967  | -2.259475 |
| H  | 0 | -0.536841 | 2.028099  | -0.111318 |
| H  | 0 | 1.096615  | 1.625995  | -0.619791 |
| H  | 0 | -1.575256 | -2.492248 | -1.314075 |
| H  | 0 | -2.710922 | -1.248726 | -1.859488 |
| H  | 0 | -1.876664 | -2.266551 | -3.044067 |
| H  | 0 | -2.747697 | 1.968329  | -4.684933 |
| H  | 0 | -2.220914 | 3.446760  | -3.867001 |
| H  | 0 | -1.081408 | 2.527620  | -4.857046 |
| H  | 0 | 1.454917  | 0.696201  | -2.963544 |
| H  | 0 | 0.721150  | 1.681329  | -4.249405 |
| H  | 0 | -3.635390 | 1.063115  | -2.561980 |
| H  | 0 | -2.680072 | 1.039744  | -1.076384 |
| H  | 0 | -3.152548 | 2.578461  | -1.797590 |

Energy + ZPE = -1148.056005

Free energy = -1148.103312

Free energy in DCM = -1148.445431

Free energy in heptane = -1148.447364

Number of imaginary frequencies = 1 (-401.79)

**TS 16a+cpSiX**

|   |   |           |          |          |
|---|---|-----------|----------|----------|
| C | 0 | 0.114402  | 2.362720 | 1.729414 |
| C | 0 | -0.506619 | 3.432889 | 1.096480 |
| C | 0 | -0.511536 | 2.198946 | 3.083024 |
| C | 0 | -1.672949 | 3.772912 | 1.805124 |

|    |   |           |           |           |   |   |           |           |           |
|----|---|-----------|-----------|-----------|---|---|-----------|-----------|-----------|
| C  | 0 | -1.861496 | 2.850438  | 2.853830  | C | 0 | -3.654510 | -0.760650 | -1.246603 |
| H  | 0 | 1.061421  | 1.921535  | 1.440930  | B | 0 | -1.024554 | -0.058491 | -0.956120 |
| H  | 0 | -0.186286 | 3.884214  | 0.163226  | C | 0 | 0.300488  | -0.134449 | -0.100649 |
| H  | 0 | 0.046375  | 2.831186  | 3.795395  | C | 0 | 1.328502  | 1.040650  | -0.260622 |
| H  | 0 | -0.525947 | 1.184379  | 3.480549  | C | 0 | 2.780382  | 0.525701  | -0.346853 |
| H  | 0 | -2.384896 | 4.536051  | 1.507416  | C | 0 | 3.126913  | -0.676534 | 0.611246  |
| H  | 0 | -2.557457 | 3.026327  | 3.669455  | C | 0 | 2.446080  | -1.562319 | -0.487478 |
| Cl | 0 | -0.788492 | -1.346790 | 2.631105  | C | 0 | 0.913797  | -1.575212 | -0.366671 |
| C  | 0 | -1.816231 | 0.774785  | 0.968277  | C | 0 | 1.123861  | 2.112297  | 0.821322  |
| C  | 0 | -2.734896 | 1.242142  | 1.920982  | C | 0 | 4.648498  | -0.910225 | 0.670283  |
| B  | 0 | -0.866784 | -0.405325 | 1.068138  | C | 0 | 2.845157  | -0.483680 | -1.527308 |
| C  | 0 | 0.010992  | -0.934958 | -0.141573 | C | 0 | 2.608955  | -0.740111 | 2.053621  |
| C  | 0 | -0.599875 | -2.263882 | -0.743006 | H | 0 | -2.368251 | 0.809958  | 1.532912  |
| C  | 0 | 0.503639  | -3.247191 | -1.187794 | H | 0 | -2.664815 | 2.776744  | -0.241306 |
| C  | 0 | 1.760411  | -2.585866 | -1.872014 | H | 0 | -5.031498 | 0.782195  | 1.463340  |
| C  | 0 | 2.221128  | -2.285522 | -0.404058 | H | 0 | -4.441188 | -0.900626 | 1.276499  |
| C  | 0 | 1.546591  | -1.035225 | 0.183390  | H | 0 | -4.763076 | 2.205349  | -1.761847 |
| C  | 0 | -1.629576 | -1.960282 | -1.841400 | H | 0 | -5.785120 | -0.105886 | -0.935939 |
| C  | 0 | 2.644816  | -3.654654 | -2.542037 | H | 0 | -2.215259 | -1.346304 | 0.295523  |
| C  | 0 | 1.405308  | -3.524732 | 0.047407  | H | 0 | -3.953999 | -1.812440 | -1.169403 |
| C  | 0 | 1.625485  | -1.429534 | -2.870861 | H | 0 | -3.473973 | -0.544039 | -2.302333 |
| H  | 0 | -1.860504 | 1.258412  | -0.008121 | H | 0 | -0.015367 | -0.136168 | 0.949835  |
| H  | 0 | -3.628864 | 1.761776  | 1.585712  | H | 0 | 1.144973  | 1.532867  | -1.224775 |
| H  | 0 | -2.882868 | 0.654769  | 2.825163  | H | 0 | 3.484362  | 1.368336  | -0.351685 |
| H  | 0 | -0.092678 | -0.178429 | -0.929035 | H | 0 | 2.827446  | -2.583099 | -0.621224 |
| H  | 0 | -1.141048 | -2.792327 | 0.055293  | H | 0 | 0.595923  | -2.245128 | 0.441586  |
| H  | 0 | 0.059438  | -4.108735 | -1.704594 | H | 0 | 0.521050  | -2.013176 | -1.295547 |
| H  | 0 | 3.301552  | -2.273552 | -0.208206 | H | 0 | 1.315396  | 1.726327  | 1.828389  |
| H  | 0 | 1.713489  | -1.055977 | 1.267766  | H | 0 | 1.796330  | 2.962993  | 0.656609  |
| H  | 0 | 2.042783  | -0.128318 | -0.188695 | H | 0 | 0.096259  | 2.497693  | 0.804435  |
| H  | 0 | -2.105730 | -2.883686 | -2.193778 | H | 0 | 5.129190  | -0.896268 | -0.311817 |
| H  | 0 | -2.421475 | -1.301447 | -1.464402 | H | 0 | 5.129087  | -0.136574 | 1.282707  |
| H  | 0 | -1.172396 | -1.469556 | -2.707503 | H | 0 | 4.870078  | -1.880821 | 1.132456  |
| H  | 0 | 3.628864  | -3.236824 | -2.791327 | H | 0 | 2.149717  | -0.313722 | -2.356312 |
| H  | 0 | 2.810528  | -4.536051 | -1.916388 | H | 0 | 3.848277  | -0.622779 | -1.935659 |
| H  | 0 | 2.186214  | -3.997917 | -3.478431 | H | 0 | 3.078653  | 0.037853  | 2.668923  |
| H  | 0 | 0.922320  | -3.463646 | 1.028577  | H | 0 | 1.528084  | -0.624214 | 2.143876  |
| H  | 0 | 1.961323  | -4.462919 | -0.012852 | H | 0 | 2.873335  | -1.706909 | 2.502391  |
| H  | 0 | 1.141139  | -1.769534 | -3.795395 |   |   |           |           |           |
| H  | 0 | 1.055338  | -0.580521 | -2.492322 |   |   |           |           |           |
| H  | 0 | 2.621250  | -1.058541 | -3.148862 |   |   |           |           |           |

Energy + ZPE = -1148.055828

Free energy = -1148.103507

Free energy in DCM = -1148.444230

Free energy in heptane = -1148.446532

Number of imaginary frequencies = 1 (-404.95)

#### Product 16a+cpReN

|    |   |           |           |           |
|----|---|-----------|-----------|-----------|
| C  | 0 | -2.982818 | 0.654683  | 0.643200  |
| C  | 0 | -3.283755 | 1.885578  | -0.198574 |
| C  | 0 | -4.415137 | 0.111896  | 0.855498  |
| C  | 0 | -4.344946 | 1.597580  | -0.965490 |
| C  | 0 | -4.767797 | 0.171146  | -0.648456 |
| Cl | 0 | -0.911817 | 0.442344  | -2.676643 |
| C  | 0 | -2.412912 | -0.472382 | -0.345350 |

Energy + ZPE = -1148.098870

Free energy = -1148.146106

Free energy in DCM = -1148.490336

Free energy in heptane = -1148.493654

Number of imaginary frequencies = 0

#### Product 16a+cpReX

|    |   |           |           |           |
|----|---|-----------|-----------|-----------|
| C  | 0 | 2.500135  | 0.316342  | 4.083265  |
| C  | 0 | 3.309379  | 1.507801  | 3.596102  |
| C  | 0 | 1.073297  | 0.907986  | 4.022142  |
| C  | 0 | 2.561532  | 2.163491  | 2.696644  |
| C  | 0 | 1.240276  | 1.421818  | 2.575010  |
| Cl | 0 | -0.618740 | -1.830498 | 2.152310  |
| C  | 0 | 1.593809  | 0.049598  | 1.808118  |
| C  | 0 | 2.427369  | -0.703708 | 2.891955  |
| B  | 0 | 0.280544  | -0.584086 | 1.217614  |
| C  | 0 | -0.247223 | -0.173154 | -0.210768 |

|   |   |           |           |           |
|---|---|-----------|-----------|-----------|
| C | 0 | -1.796616 | -0.093548 | -0.431485 |
| C | 0 | -2.217084 | -0.716819 | -1.779249 |
| C | 0 | -1.246485 | -0.427998 | -2.987161 |
| C | 0 | -0.386483 | -1.594059 | -2.389521 |
| C | 0 | 0.506976  | -1.133813 | -1.226706 |
| C | 0 | -2.316740 | 1.338144  | -0.230357 |
| C | 0 | -1.897857 | -0.830358 | -4.323948 |
| C | 0 | -1.693418 | -2.180390 | -1.795518 |
| C | 0 | -0.604243 | 0.948757  | -3.198976 |
| H | 0 | 2.815828  | -0.128917 | 5.030012  |
| H | 0 | 4.345949  | 1.701853  | 3.854406  |
| H | 0 | 0.920729  | 1.723045  | 4.736560  |
| H | 0 | 0.283384  | 0.158591  | 4.139232  |
| H | 0 | 2.861354  | 2.994981  | 2.065994  |
| H | 0 | 0.410390  | 1.987181  | 2.143083  |
| H | 0 | 2.225357  | 0.315714  | 0.950380  |
| H | 0 | 3.421817  | -0.977981 | 2.526150  |
| H | 0 | 1.928216  | -1.620654 | 3.220127  |
| H | 0 | 0.154286  | 0.829965  | -0.400647 |
| H | 0 | -2.286380 | -0.712081 | 0.331792  |
| H | 0 | -3.287430 | -0.551740 | -1.959749 |
| H | 0 | 0.189245  | -2.208872 | -3.093735 |
| H | 0 | 1.398445  | -0.617384 | -1.602500 |
| H | 0 | 0.872788  | -2.041692 | -0.724964 |
| H | 0 | -3.409511 | 1.369443  | -0.318654 |
| H | 0 | -2.057457 | 1.714261  | 0.767768  |
| H | 0 | -1.902910 | 2.037077  | -0.965332 |
| H | 0 | -2.390125 | -1.806175 | -4.290509 |
| H | 0 | -2.653438 | -0.090682 | -4.617930 |
| H | 0 | -1.144848 | -0.867455 | -5.121628 |
| H | 0 | -1.613482 | -2.682501 | -0.825118 |
| H | 0 | -2.230437 | -2.835729 | -2.484202 |
| H | 0 | 0.115849  | 0.901602  | -4.026802 |
| H | 0 | -1.363110 | 1.691402  | -3.476573 |
| H | 0 | -0.072938 | 1.331250  | -2.326643 |

Energy + ZPE = -1148.099114

Free energy = -1148.145844

Free energy in DCM = -1148.490314

Free energy in heptane = -1148.494002

Number of imaginary frequencies = 0

#### Product 16a+cpSiN

|    |   |           |           |           |
|----|---|-----------|-----------|-----------|
| C  | 0 | -0.737634 | -1.141656 | 3.834518  |
| C  | 0 | 0.204362  | 0.049450  | 3.732046  |
| C  | 0 | -2.034030 | -0.424886 | 4.276207  |
| C  | 0 | -0.519208 | 1.102564  | 3.324176  |
| C  | 0 | -1.955349 | 0.630001  | 3.148743  |
| Cl | 0 | -2.866911 | 1.561411  | -0.064714 |
| C  | 0 | -1.987482 | -0.333493 | 1.871664  |
| C  | 0 | -1.112626 | -1.535674 | 2.362502  |
| B  | 0 | -1.605353 | 0.422348  | 0.542617  |
| C  | 0 | -0.294205 | 0.214038  | -0.301795 |
| C  | 0 | 0.282544  | 1.438448  | -1.092039 |
| C  | 0 | 0.738704  | 1.041218  | -2.510931 |
| C  | 0 | 1.452040  | -0.360599 | -2.622476 |

|   |   |           |           |           |
|---|---|-----------|-----------|-----------|
| C | 0 | -0.003449 | -0.941207 | -2.619791 |
| C | 0 | -0.585976 | -1.063736 | -1.202645 |
| C | 0 | 1.371384  | 2.160997  | -0.283735 |
| C | 0 | 2.128762  | -0.522177 | -3.997213 |
| C | 0 | -0.482071 | 0.401181  | -3.229616 |
| C | 0 | 2.456887  | -0.846885 | -1.570521 |
| H | 0 | -0.392470 | -1.978069 | 4.447403  |
| H | 0 | 1.281284  | 0.001610  | 3.861989  |
| H | 0 | -1.953702 | 0.019536  | 5.273565  |
| H | 0 | -2.928919 | -1.056562 | 4.222161  |
| H | 0 | -0.154371 | 2.091124  | 3.061549  |
| H | 0 | -2.724409 | 1.403859  | 3.123583  |
| H | 0 | -3.031911 | -0.662053 | 1.778474  |
| H | 0 | -1.693274 | -2.465294 | 2.349814  |
| H | 0 | -0.217119 | -1.705773 | 1.757876  |
| H | 0 | 0.477641  | -0.093168 | 0.412702  |
| H | 0 | -0.525846 | 2.164742  | -1.245400 |
| H | 0 | 1.239141  | 1.885670  | -3.002697 |
| H | 0 | -0.180973 | -1.864816 | -3.186242 |
| H | 0 | -0.188464 | -1.950142 | -0.694441 |
| H | 0 | -1.665832 | -1.240431 | -1.314615 |
| H | 0 | 0.988768  | 2.477587  | 0.694417  |
| H | 0 | 2.245063  | 1.524796  | -0.105409 |
| H | 0 | 1.714246  | 3.059144  | -0.811672 |
| H | 0 | 3.056874  | 0.062432  | -4.034820 |
| H | 0 | 2.393720  | -1.572541 | -4.174220 |
| H | 0 | 1.502236  | -0.194881 | -4.831471 |
| H | 0 | -0.420438 | 0.430424  | -4.319466 |
| H | 0 | -1.472584 | 0.757793  | -2.925951 |
| H | 0 | 2.762230  | -1.877607 | -1.795101 |
| H | 0 | 3.365789  | -0.232171 | -1.589289 |
| H | 0 | 2.072947  | -0.836562 | -0.549740 |

Energy + ZPE = -1148.099105

Free energy = -1148.145786

Free energy in DCM = -1148.490965

Free energy in heptane = -1148.494252

Number of imaginary frequencies = 0

#### Product 16a+cpSiX

|    |   |           |           |           |
|----|---|-----------|-----------|-----------|
| C  | 0 | -0.264513 | 1.845866  | 2.521993  |
| C  | 0 | -0.279768 | 3.327651  | 2.169003  |
| C  | 0 | -1.682692 | 1.696556  | 3.121125  |
| C  | 0 | -1.530636 | 3.643203  | 1.802778  |
| C  | 0 | -2.370346 | 2.380278  | 1.917933  |
| Cl | 0 | -0.104371 | -1.445543 | 2.553055  |
| C  | 0 | -0.418658 | 1.091294  | 1.144027  |
| C  | 0 | -1.920234 | 1.421640  | 0.762089  |
| B  | 0 | -0.150192 | -0.455606 | 1.053018  |
| C  | 0 | 0.159145  | -1.146105 | -0.331116 |
| C  | 0 | -0.369794 | -2.603226 | -0.564327 |
| C  | 0 | 0.692745  | -3.499466 | -1.234376 |
| C  | 0 | 1.552850  | -2.802035 | -2.355938 |
| C  | 0 | 2.382364  | -2.221657 | -1.159441 |
| C  | 0 | 1.726068  | -0.979462 | -0.537274 |
| C  | 0 | -1.719044 | -2.594368 | -1.299599 |



|   |   |           |           |           |   |   |           |           |           |
|---|---|-----------|-----------|-----------|---|---|-----------|-----------|-----------|
| C | 0 | 2.358472  | -3.842664 | -3.156619 | C | 0 | 1.435164  | 0.727509  | -0.024124 |
| C | 0 | 1.959531  | -3.464414 | -0.334358 | C | 0 | 2.922814  | 0.411362  | -0.281476 |
| C | 0 | 0.929437  | -1.839364 | -3.374271 | C | 0 | 3.483772  | -0.846438 | 0.484046  |
| H | 0 | 0.570931  | 1.500214  | 3.133973  | C | 0 | 2.820744  | -1.668145 | -0.672620 |
| H | 0 | 0.601884  | 3.959248  | 2.111812  | C | 0 | 1.315832  | -1.882753 | -0.451407 |
| H | 0 | -1.805139 | 2.256503  | 4.053324  | C | 0 | 1.211332  | 1.613490  | 1.210923  |
| H | 0 | -1.990482 | 0.656855  | 3.272790  | C | 0 | 5.021316  | -0.893388 | 0.411362  |
| H | 0 | -1.879474 | 4.584713  | 1.389655  | C | 0 | 3.001252  | -0.428936 | -1.587781 |
| H | 0 | -3.453174 | 2.519998  | 1.972029  | C | 0 | 3.090691  | -1.152049 | 1.934606  |
| H | 0 | 0.234669  | 1.565116  | 0.397767  | H | 0 | -2.172305 | -1.455963 | 0.740905  |
| H | 0 | -2.002452 | 1.881182  | -0.227081 | H | 0 | -4.042457 | -1.967544 | -0.724288 |
| H | 0 | -2.558919 | 0.528541  | 0.761709  | H | 0 | -3.203447 | -1.178050 | -2.135528 |
| H | 0 | -0.308558 | -0.512011 | -1.094356 | H | 0 | 0.293948  | -0.740239 | 1.077786  |
| H | 0 | -0.553314 | -3.065463 | 0.414416  | H | 0 | 1.116100  | 1.318355  | -0.893175 |
| H | 0 | 0.265848  | -4.480306 | -1.481867 | H | 0 | 3.524567  | 1.328530  | -0.223875 |
| H | 0 | 3.453174  | -2.045401 | -1.325634 | H | 0 | 3.306633  | -2.608615 | -0.964668 |
| H | 0 | 2.239203  | -0.787846 | 0.416579  | H | 0 | 1.143112  | -2.677884 | 0.284539  |
| H | 0 | 1.905504  | -0.094213 | -1.159114 | H | 0 | 0.899653  | -2.250926 | -1.398750 |
| H | 0 | -2.117454 | -3.611986 | -1.392224 | H | 0 | 1.525038  | 1.122281  | 2.138106  |
| H | 0 | -2.460626 | -1.999675 | -0.750785 | H | 0 | 1.774268  | 2.551110  | 1.123688  |
| H | 0 | -1.640153 | -2.174180 | -2.308103 | H | 0 | 0.151306  | 1.875793  | 1.318365  |
| H | 0 | 3.130729  | -3.348730 | -3.760223 | H | 0 | 5.413528  | -0.692783 | -0.589651 |
| H | 0 | 2.857298  | -4.584713 | -2.527011 | H | 0 | 5.459768  | -0.151233 | 1.091158  |
| H | 0 | 1.699299  | -4.385956 | -3.845750 | H | 0 | 5.390244  | -1.880469 | 0.719121  |
| H | 0 | 1.793850  | -3.314694 | 0.738180  | H | 0 | 2.215813  | -0.249821 | -2.329292 |
| H | 0 | 2.621952  | -4.321838 | -0.468821 | H | 0 | 3.973769  | -0.387070 | -2.083282 |
| H | 0 | 0.255416  | -2.376853 | -4.053324 | H | 0 | 3.506843  | -0.400445 | 2.617782  |
| H | 0 | 0.363197  | -1.021611 | -2.926515 | H | 0 | 2.013171  | -1.191272 | 2.101174  |
| H | 0 | 1.717295  | -1.390471 | -3.993767 | H | 0 | 3.504564  | -2.123674 | 2.236492  |

Energy + ZPE = -1148.098937

Free energy = -1148.145511

Free energy in DCM = -1148.490882

Free energy in heptane = -1148.494321

Number of imaginary frequencies = 0

Energy + ZPE = -3259.567511

Free energy = -3259.615248

Free energy in DCM = -3259.956520

Free energy in heptane = -3259.958756

Number of imaginary frequencies = 1 (-394.92)

## Diels-Alder reaction with Vinylborane (16b)

### TS 16b+cpReN

|    |   |           |           |           |
|----|---|-----------|-----------|-----------|
| C  | 0 | -2.869999 | 1.322500  | 0.615486  |
| C  | 0 | -2.852701 | 1.951901  | -0.618323 |
| C  | 0 | -4.158996 | 0.557661  | 0.731217  |
| C  | 0 | -3.865037 | 1.403754  | -1.427177 |
| C  | 0 | -4.493995 | 0.346749  | -0.736994 |
| H  | 0 | -2.224928 | 1.553068  | 1.455038  |
| H  | 0 | -2.118768 | 2.677884  | -0.947759 |
| H  | 0 | -4.920377 | 1.232494  | 1.158774  |
| H  | 0 | -4.129372 | -0.339399 | 1.351393  |
| H  | 0 | -4.036287 | 1.660239  | -2.466811 |
| H  | 0 | -5.459768 | -0.044257 | -1.046211 |
| Br | 0 | -0.761709 | 0.179172  | -2.617782 |
| C  | 0 | -2.136972 | -1.074109 | -0.280974 |
| C  | 0 | -3.299624 | -1.242671 | -1.055676 |
| B  | 0 | -0.815110 | -0.518020 | -0.763648 |
| C  | 0 | 0.556384  | -0.575631 | 0.024500  |

### TS 16b+cpReX

|    |   |           |           |           |
|----|---|-----------|-----------|-----------|
| C  | 0 | -0.620545 | 2.513931  | 4.041620  |
| C  | 0 | 0.648340  | 3.120680  | 3.933534  |
| C  | 0 | -1.340756 | 2.822599  | 2.742075  |
| C  | 0 | 0.929834  | 3.365058  | 2.576496  |
| C  | 0 | -0.181196 | 3.029369  | 1.816719  |
| H  | 0 | -1.153931 | 2.450207  | 4.986323  |
| H  | 0 | 1.352152  | 3.246990  | 4.750071  |
| H  | 0 | -1.855795 | 3.790562  | 2.870332  |
| H  | 0 | -2.081271 | 2.094802  | 2.409796  |
| H  | 0 | 1.885363  | 3.696786  | 2.184048  |
| H  | 0 | -0.275653 | 3.152137  | 0.744616  |
| Br | 0 | -2.485528 | -0.332881 | 1.362963  |
| C  | 0 | 0.247107  | 0.440827  | 2.361001  |
| C  | 0 | -0.222747 | 0.561969  | 3.681841  |
| B  | 0 | -0.527902 | -0.057703 | 1.161159  |
| C  | 0 | 0.101355  | -0.516714 | -0.216914 |
| C  | 0 | -0.558126 | 0.131324  | -1.492964 |
| C  | 0 | -0.791267 | -0.905731 | -2.611099 |
| C  | 0 | 0.373533  | -1.948064 | -2.812808 |

|   |   |           |           |           |
|---|---|-----------|-----------|-----------|
| C | 0 | -0.278736 | -2.695652 | -1.601684 |
| C | 0 | 0.143713  | -2.098888 | -0.249901 |
| C | 0 | 0.224077  | 1.364222  | -1.970556 |
| C | 0 | 0.193896  | -2.724265 | -4.130866 |
| C | 0 | -1.635415 | -2.064080 | -2.008540 |
| C | 0 | 1.850322  | -1.542389 | -2.726577 |
| H | 0 | 1.320814  | 0.572091  | 2.219888  |
| H | 0 | 0.472927  | 0.417473  | 4.504770  |
| H | 0 | -1.226625 | 0.195925  | 3.889787  |
| H | 0 | 1.145715  | -0.179251 | -0.200790 |
| H | 0 | -1.561339 | 0.483704  | -1.215918 |
| H | 0 | -1.168400 | -0.411120 | -3.516452 |
| H | 0 | -0.197140 | -3.790562 | -1.582479 |
| H | 0 | 1.155761  | -2.429070 | 0.015575  |
| H | 0 | -0.523838 | -2.520391 | 0.513013  |
| H | 0 | 1.229365  | 1.107349  | -2.320354 |
| H | 0 | -0.299359 | 1.861977  | -2.796364 |
| H | 0 | 0.337609  | 2.095494  | -1.160809 |
| H | 0 | -0.832213 | -3.064272 | -4.297141 |
| H | 0 | 0.475205  | -2.096448 | -4.986323 |
| H | 0 | 0.841930  | -3.610243 | -4.145493 |
| H | 0 | -2.316774 | -1.800088 | -1.193851 |
| H | 0 | -2.182549 | -2.645192 | -2.754081 |
| H | 0 | 2.127051  | -0.894511 | -3.568280 |
| H | 0 | 2.112475  | -1.020193 | -1.805020 |
| H | 0 | 2.485528  | -2.436372 | -2.787946 |

Energy + ZPE = -3259.567397

Free energy = -3259.615082

Free energy in DCM = -3259.955857

Free energy in heptane = -3259.958424

Number of imaginary frequencies = 1 (-399.33)

#### TS 16b+cpSiN

|    |   |           |           |           |
|----|---|-----------|-----------|-----------|
| C  | 0 | 1.679633  | -1.606597 | 3.620866  |
| C  | 0 | 2.600475  | -0.664866 | 3.116596  |
| C  | 0 | 0.399331  | -0.829124 | 3.883760  |
| C  | 0 | 1.903282  | 0.461300  | 2.641744  |
| C  | 0 | 0.552257  | 0.299964  | 2.902257  |
| H  | 0 | 1.991045  | -2.420256 | 4.270558  |
| H  | 0 | 3.663047  | -0.837861 | 2.986174  |
| H  | 0 | 0.463796  | -0.408026 | 4.901818  |
| H  | 0 | -0.529896 | -1.397049 | 3.821369  |
| H  | 0 | 2.345364  | 1.274419  | 2.078358  |
| H  | 0 | -0.227446 | 1.017538  | 2.674817  |
| Br | 0 | 2.453406  | -0.845678 | -0.430995 |
| C  | 0 | 0.183044  | -1.776948 | 1.277605  |
| C  | 0 | 1.055118  | -2.619477 | 1.990422  |
| B  | 0 | 0.547197  | -0.886825 | 0.111690  |
| C  | 0 | -0.458778 | -0.043871 | -0.772363 |
| C  | 0 | -0.664988 | -0.733823 | -2.181056 |
| C  | 0 | -0.754100 | 0.306241  | -3.317761 |
| C  | 0 | -1.564897 | 1.612120  | -2.973536 |
| C  | 0 | -0.243635 | 2.074805  | -2.269656 |
| C  | 0 | -0.087014 | 1.481563  | -0.860786 |
| C  | 0 | -1.838334 | -1.723956 | -2.156093 |

|   |   |           |           |           |
|---|---|-----------|-----------|-----------|
| C | 0 | -1.851937 | 2.429778  | -4.246999 |
| C | 0 | 0.537781  | 1.169679  | -3.257800 |
| C | 0 | -2.869167 | 1.563810  | -2.167949 |
| H | 0 | -0.868751 | -1.807153 | 1.567571  |
| H | 0 | 0.629690  | -3.441560 | 2.565011  |
| H | 0 | 2.018032  | -2.850122 | 1.543918  |
| H | 0 | -1.429003 | -0.105938 | -0.262726 |
| H | 0 | 0.234889  | -1.322451 | -2.410261 |
| H | 0 | -1.000315 | -0.188425 | -4.267175 |
| H | 0 | -0.026708 | 3.151304  | -2.265239 |
| H | 0 | -0.705412 | 2.038272  | -0.143687 |
| H | 0 | 0.955891  | 1.636656  | -0.557686 |
| H | 0 | -1.696881 | -2.476001 | -1.369918 |
| H | 0 | -2.795281 | -1.224303 | -1.970702 |
| H | 0 | -1.918915 | -2.255178 | -3.112647 |
| H | 0 | -2.651078 | 1.957378  | -4.832926 |
| H | 0 | -2.188857 | 3.441560  | -3.986234 |
| H | 0 | -0.981943 | 2.531424  | -4.901818 |
| H | 0 | 1.433772  | 0.678749  | -2.863836 |
| H | 0 | 0.787355  | 1.659618  | -4.201595 |
| H | 0 | -3.663047 | 1.070127  | -2.743313 |
| H | 0 | -2.780854 | 1.043606  | -1.213246 |
| H | 0 | -3.215229 | 2.584369  | -1.955258 |

Energy + ZPE = -3259.568130

Free energy = -3259.615921

Free energy in DCM = -3259.957418

Free energy in heptane = -3259.959554

Number of imaginary frequencies = 1 (-390.52)

#### TS 16b+cpSiX

|    |   |           |           |           |
|----|---|-----------|-----------|-----------|
| C  | 0 | 0.102064  | 2.497255  | 1.730668  |
| C  | 0 | -0.586985 | 3.561061  | 1.164095  |
| C  | 0 | -0.480043 | 2.231149  | 3.086014  |
| C  | 0 | -1.746155 | 3.812892  | 1.920820  |
| C  | 0 | -1.863893 | 2.832298  | 2.927174  |
| H  | 0 | 1.053585  | 2.105923  | 1.390005  |
| H  | 0 | -0.315742 | 4.069531  | 0.244817  |
| H  | 0 | 0.066219  | 2.846555  | 3.821773  |
| H  | 0 | -0.434356 | 1.194998  | 3.421565  |
| H  | 0 | -2.500202 | 4.555481  | 1.680087  |
| H  | 0 | -2.538039 | 2.943044  | 3.772126  |
| Br | 0 | -0.738286 | -1.363375 | 2.687486  |
| C  | 0 | -1.816908 | 0.847415  | 0.948140  |
| C  | 0 | -2.719575 | 1.263403  | 1.941398  |
| B  | 0 | -0.860442 | -0.323047 | 1.000190  |
| C  | 0 | 0.008609  | -0.855203 | -0.209827 |
| C  | 0 | -0.611178 | -2.191214 | -0.788519 |
| C  | 0 | 0.484147  | -3.206312 | -1.175066 |
| C  | 0 | 1.760477  | -2.589879 | -1.863788 |
| C  | 0 | 2.204634  | -2.240682 | -0.402285 |
| C  | 0 | 1.543628  | -0.955769 | 0.121354  |
| C  | 0 | -1.612905 | -1.903402 | -1.916316 |
| C  | 0 | 2.637436  | -3.695798 | -2.480688 |
| C  | 0 | 1.361917  | -3.447761 | 0.085514  |
| C  | 0 | 1.655206  | -1.468232 | -2.904612 |
| H  | 0 | -1.887106 | 1.363260  | -0.010320 |

|   |   |           |           |           |
|---|---|-----------|-----------|-----------|
| H | 0 | -3.631815 | 1.777189  | 1.648885  |
| H | 0 | -2.835256 | 0.626396  | 2.816464  |
| H | 0 | -0.097091 | -0.105180 | -1.004152 |
| H | 0 | -1.178902 | -2.683617 | 0.014263  |
| H | 0 | 0.036149  | -4.081097 | -1.665590 |
| H | 0 | 3.282181  | -2.237730 | -0.190911 |
| H | 0 | 1.701382  | -0.925671 | 1.206727  |
| H | 0 | 2.051773  | -0.073773 | -0.291537 |
| H | 0 | -2.096182 | -2.829147 | -2.252521 |
| H | 0 | -2.402195 | -1.223497 | -1.572339 |
| H | 0 | -1.132949 | -1.442802 | -2.786448 |
| H | 0 | 3.631815  | -3.303015 | -2.729895 |
| H | 0 | 2.779288  | -4.555481 | -1.819865 |
| H | 0 | 2.187303  | -4.066549 | -3.410733 |
| H | 0 | 0.866577  | -3.337026 | 1.055665  |
| H | 0 | 1.904127  | -4.395844 | 0.070689  |
| H | 0 | 1.175019  | -1.832954 | -3.821773 |
| H | 0 | 1.095084  | -0.597463 | -2.561609 |
| H | 0 | 2.659725  | -1.122950 | -3.184203 |

Energy + ZPE = -3259.568345  
Free energy = -3259.615914  
Free energy in DCM = -3259.956681  
Free energy in heptane = -3259.959174  
Number of imaginary frequencies = 1 (-398.70)

**Product 16b+cpReN**

|    |   |           |           |           |
|----|---|-----------|-----------|-----------|
| C  | 0 | -2.773596 | 0.666749  | 1.161045  |
| C  | 0 | -3.085089 | 1.762178  | 0.153532  |
| C  | 0 | -4.187551 | 0.074830  | 1.367866  |
| C  | 0 | -4.088485 | 1.323916  | -0.619605 |
| C  | 0 | -4.456820 | -0.073484 | -0.146581 |
| Br | 0 | -0.576229 | 0.461668  | -2.067880 |
| C  | 0 | -2.096601 | -0.553584 | 0.363397  |
| C  | 0 | -3.266699 | -1.008680 | -0.565797 |
| B  | 0 | -0.698658 | -0.147928 | -0.220400 |
| C  | 0 | 0.632969  | -0.254576 | 0.613548  |
| C  | 0 | 1.668239  | 0.917139  | 0.471087  |
| C  | 0 | 3.105021  | 0.392944  | 0.274898  |
| C  | 0 | 3.490412  | -0.855696 | 1.155047  |
| C  | 0 | 2.740385  | -1.683659 | 0.057368  |
| C  | 0 | 1.218562  | -1.692047 | 0.267605  |
| C  | 0 | 1.533309  | 1.928274  | 1.620151  |
| C  | 0 | 5.009604  | -1.104514 | 1.119511  |
| C  | 0 | 3.086953  | -0.560272 | -0.954170 |
| C  | 0 | 3.047265  | -0.982436 | 2.617620  |
| H  | 0 | -2.218635 | 0.965502  | 2.053584  |
| H  | 0 | -2.504963 | 2.670145  | 0.023060  |
| H  | 0 | -4.869556 | 0.780496  | 1.853251  |
| H  | 0 | -4.187541 | -0.876626 | 1.913524  |
| H  | 0 | -4.487787 | 1.802891  | -1.508051 |
| H  | 0 | -5.441364 | -0.441524 | -0.445835 |
| H  | 0 | -1.911371 | -1.327521 | 1.123438  |
| H  | 0 | -3.520053 | -2.059083 | -0.380055 |
| H  | 0 | -3.026676 | -0.905910 | -1.627116 |
| H  | 0 | 0.337109  | -0.295873 | 1.669443  |

|   |   |          |           |           |
|---|---|----------|-----------|-----------|
| H | 0 | 1.436187 | 1.464858  | -0.451581 |
| H | 0 | 3.818875 | 1.227275  | 0.268018  |
| H | 0 | 3.103398 | -2.699892 | -0.144864 |
| H | 0 | 0.940443 | -2.387313 | 1.068808  |
| H | 0 | 0.769873 | -2.093893 | -0.652254 |
| H | 0 | 1.771752 | 1.487841  | 2.594070  |
| H | 0 | 2.205926 | 2.780842  | 1.466145  |
| H | 0 | 0.510602 | 2.323038  | 1.677019  |
| H | 0 | 5.435987 | -1.040768 | 0.114435  |
| H | 0 | 5.531022 | -0.368617 | 1.744956  |
| H | 0 | 5.245630 | -2.100423 | 1.516066  |
| H | 0 | 2.340716 | -0.346743 | -1.726612 |
| H | 0 | 4.061548 | -0.687563 | -1.430050 |
| H | 0 | 3.562626 | -0.244204 | 3.245160  |
| H | 0 | 1.974638 | -0.853372 | 2.769948  |
| H | 0 | 3.315586 | -1.974820 | 3.004108  |

Energy + ZPE = -3259.609069  
Free energy = -3259.656895  
Free energy in DCM = -3260.000166  
Free energy in heptane = -3260.003603  
Number of imaginary frequencies = 0

**Product 16b+cpReX**

|    |   |           |           |           |
|----|---|-----------|-----------|-----------|
| C  | 0 | 2.527200  | 0.611134  | 3.543427  |
| C  | 0 | 3.288855  | 1.873307  | 3.170787  |
| C  | 0 | 1.076279  | 1.144566  | 3.511093  |
| C  | 0 | 2.524027  | 2.570100  | 2.317519  |
| C  | 0 | 1.237809  | 1.786344  | 2.114928  |
| Br | 0 | -0.575898 | -1.552998 | 1.559478  |
| C  | 0 | 1.660269  | 0.499007  | 1.240514  |
| C  | 0 | 2.516702  | -0.304671 | 2.268503  |
| B  | 0 | 0.377422  | -0.141311 | 0.600982  |
| C  | 0 | -0.159341 | 0.282256  | -0.816162 |
| C  | 0 | -1.713635 | 0.383733  | -1.008382 |
| C  | 0 | -2.177861 | -0.312979 | -2.302563 |
| C  | 0 | -1.246979 | -0.092363 | -3.554688 |
| C  | 0 | -0.371646 | -1.229668 | -2.927811 |
| C  | 0 | 0.565706  | -0.707536 | -1.828996 |
| C  | 0 | -2.202304 | 1.835134  | -0.883066 |
| C  | 0 | -1.945109 | -0.556843 | -4.846532 |
| C  | 0 | -1.656663 | -1.777509 | -2.254503 |
| C  | 0 | -0.603200 | 1.266976  | -3.854385 |
| H  | 0 | 2.851725  | 0.100964  | 4.453699  |
| H  | 0 | 4.312925  | 2.089052  | 3.459992  |
| H  | 0 | 0.880460  | 1.889280  | 4.288858  |
| H  | 0 | 0.316655  | 0.357266  | 3.547055  |
| H  | 0 | 2.794864  | 3.463635  | 1.763256  |
| H  | 0 | 0.389008  | 2.350054  | 1.718984  |
| H  | 0 | 2.283092  | 0.861445  | 0.412358  |
| H  | 0 | 3.527138  | -0.499903 | 1.895776  |
| H  | 0 | 2.054237  | -1.268271 | 2.503544  |
| H  | 0 | 0.256366  | 1.277199  | -1.019360 |
| H  | 0 | -2.193735 | -0.174377 | -0.194009 |
| H  | 0 | -3.253316 | -0.154731 | -2.457070 |
| H  | 0 | 0.176419  | -1.884076 | -3.618283 |

|   |   |           |           |           |   |   |           |           |           |
|---|---|-----------|-----------|-----------|---|---|-----------|-----------|-----------|
| H | 0 | 1.429010  | -0.192018 | -2.266140 | H | 0 | 2.547071  | 2.611346  | -0.762331 |
| H | 0 | 0.970772  | -1.586807 | -1.307130 | H | 0 | 3.635617  | -0.161785 | -4.241602 |
| H | 0 | -3.296161 | 1.881560  | -0.948811 | H | 0 | 2.962654  | -1.788361 | -4.428340 |
| H | 0 | -1.913780 | 2.264273  | 0.085235  | H | 0 | 2.039530  | -0.380445 | -4.966673 |
| H | 0 | -1.793896 | 2.482281  | -1.666373 | H | 0 | 0.145940  | 0.258244  | -4.313972 |
| H | 0 | -2.443996 | -1.524858 | -4.745910 | H | 0 | -0.816412 | 0.507635  | -2.838591 |
| H | 0 | -2.704584 | 0.173793  | -5.152999 | H | 0 | 3.405927  | -2.244622 | -2.073383 |
| H | 0 | -1.219876 | -0.642022 | -5.666029 | H | 0 | 4.068981  | -0.627235 | -1.830280 |
| H | 0 | -1.540052 | -2.222298 | -1.260446 | H | 0 | 2.805854  | -1.235820 | -0.756026 |
| H | 0 | -2.218688 | -2.468567 | -2.886125 |   |   |           |           |           |
| H | 0 | 0.085484  | 1.173922  | -4.704802 |   |   |           |           |           |
| H | 0 | -1.365758 | 2.003182  | -4.138732 |   |   |           |           |           |
| H | 0 | -0.035681 | 1.685499  | -3.021288 |   |   |           |           |           |

Energy + ZPE = -3259.610200

Free energy = -3259.657484

Free energy in DCM = -3260.001335

Free energy in heptane = -3260.005050

Number of imaginary frequencies = 0

Energy + ZPE = -3259.608204

Free energy = -3259.655452

Free energy in DCM = -3259.999827

Free energy in heptane = -3260.003224

Number of imaginary frequencies = 0

**Product 16b+cpSiN**

|    |   |           |           |           |
|----|---|-----------|-----------|-----------|
| C  | 0 | -0.105194 | -1.327717 | 3.871428  |
| C  | 0 | 0.747630  | -0.073012 | 3.744866  |
| C  | 0 | -1.474745 | -0.692323 | 4.206274  |
| C  | 0 | -0.031662 | 0.896546  | 3.243081  |
| C  | 0 | -1.416278 | 0.302416  | 3.025324  |
| Br | 0 | -2.251829 | 1.186319  | -0.267039 |
| C  | 0 | -1.297148 | -0.723315 | 1.804501  |
| C  | 0 | -0.373305 | -1.832297 | 2.410047  |
| B  | 0 | -0.875531 | 0.000562  | 0.472985  |
| C  | 0 | 0.452649  | -0.190764 | -0.342554 |
| C  | 0 | 1.048494  | 1.060724  | -1.080413 |
| C  | 0 | 1.417637  | 0.742505  | -2.542838 |
| C  | 0 | 2.103695  | -0.657183 | -2.772455 |
| C  | 0 | 0.643556  | -1.221601 | -2.729084 |
| C  | 0 | 0.142458  | -1.431369 | -1.292636 |
| C  | 0 | 2.197807  | 1.691146  | -0.278248 |
| C  | 0 | 2.709766  | -0.748404 | -4.184710 |
| C  | 0 | 0.147203  | 0.161127  | -3.226318 |
| C  | 0 | 3.143382  | -1.215575 | -1.793396 |
| H  | 0 | 0.269435  | -2.098889 | 4.549209  |
| H  | 0 | 1.816751  | -0.028887 | 3.928947  |
| H  | 0 | -1.482185 | -0.189879 | 5.178947  |
| H  | 0 | -2.314117 | -1.395625 | 4.144949  |
| H  | 0 | 0.268726  | 1.895708  | 2.941837  |
| H  | 0 | -2.238591 | 1.009802  | 2.908417  |
| H  | 0 | -2.307820 | -1.128868 | 1.657804  |
| H  | 0 | -0.891180 | -2.798238 | 2.428444  |
| H  | 0 | 0.561233  | -1.977205 | 1.860011  |
| H  | 0 | 1.213251  | -0.534946 | 0.367310  |
| H  | 0 | 0.262660  | 1.824054  | -1.143478 |
| H  | 0 | 1.903144  | 1.608674  | -3.011426 |
| H  | 0 | 0.425927  | -2.106732 | -3.341200 |
| H  | 0 | 0.586584  | -2.331870 | -0.852204 |
| H  | 0 | -0.937788 | -1.628560 | -1.356489 |
| H  | 0 | 1.867695  | 1.953449  | 0.734508  |
| H  | 0 | 3.057133  | 1.019573  | -0.180184 |

**Product 16b+cpSiX**

|    |   |           |           |           |
|----|---|-----------|-----------|-----------|
| C  | 0 | -0.315420 | 2.673818  | 2.041621  |
| C  | 0 | -0.407606 | 4.160106  | 1.724122  |
| C  | 0 | -1.703332 | 2.446854  | 2.685492  |
| C  | 0 | -1.683679 | 4.427520  | 1.409832  |
| C  | 0 | -2.463003 | 3.126265  | 1.524039  |
| Br | 0 | 0.005499  | -0.672035 | 2.144377  |
| C  | 0 | -0.486742 | 1.940471  | 0.654460  |
| C  | 0 | -2.013217 | 2.215219  | 0.329872  |
| B  | 0 | -0.165766 | 0.409392  | 0.528152  |
| C  | 0 | 0.112872  | -0.282537 | -0.858542 |
| C  | 0 | -0.455260 | -1.730565 | -1.071835 |
| C  | 0 | 0.597568  | -2.674078 | -1.686614 |
| C  | 0 | 1.491274  | -2.037626 | -2.817667 |
| C  | 0 | 2.317725  | -1.436615 | -1.630745 |
| C  | 0 | 1.684177  | -0.156144 | -1.066561 |
| C  | 0 | -1.783125 | -1.702830 | -1.844456 |
| C  | 0 | 2.281058  | -3.125155 | -3.569573 |
| C  | 0 | 1.849636  | -2.634950 | -0.764992 |
| C  | 0 | 0.906403  | -1.092281 | -3.874540 |
| H  | 0 | 0.553458  | 2.346667  | 2.615901  |
| H  | 0 | 0.442518  | 4.831990  | 1.651095  |
| H  | 0 | -1.817721 | 2.978087  | 3.635327  |
| H  | 0 | -1.950329 | 1.389089  | 2.820988  |
| H  | 0 | -2.087801 | 5.361454  | 1.031253  |
| H  | 0 | -3.548311 | 3.216774  | 1.618301  |
| H  | 0 | 0.121633  | 2.451792  | -0.105419 |
| H  | 0 | -2.146937 | 2.693807  | -0.644461 |
| H  | 0 | -2.613699 | 1.296043  | 0.328139  |
| H  | 0 | -0.345308 | 0.357676  | -1.622572 |
| H  | 0 | -0.679770 | -2.157295 | -0.085442 |
| H  | 0 | 0.151475  | -3.652986 | -1.906312 |
| H  | 0 | 3.395029  | -1.293336 | -1.786471 |
| H  | 0 | 2.195897  | 0.064250  | -0.118393 |
| H  | 0 | 1.884062  | 0.698397  | -1.724009 |
| H  | 0 | -2.206124 | -2.711666 | -1.923708 |
| H  | 0 | -2.522642 | -1.075388 | -1.330478 |
| H  | 0 | -1.665759 | -1.309828 | -2.859824 |
| H  | 0 | 3.076488  | -2.672797 | -4.175703 |
| H  | 0 | 2.748807  | -3.857912 | -2.905999 |

|   |   |          |           |           |
|---|---|----------|-----------|-----------|
| H | 0 | 1.619032 | -3.674316 | -4.251294 |
| H | 0 | 1.668353 | -2.433679 | 0.296214  |
| H | 0 | 2.491490 | -3.514028 | -0.852797 |
| H | 0 | 0.228764 | -1.633663 | -4.546855 |
| H | 0 | 0.353834 | -0.247798 | -3.459295 |
| H | 0 | 1.713887 | -0.681824 | -4.495536 |

Energy + ZPE = -3259.609639

Free energy = -3259.657255

Free energy in DCM = -3260.001307

Free energy in heptane = -3260.004850

Number of imaginary frequencies = 0

|   |   |           |           |           |
|---|---|-----------|-----------|-----------|
| H | 0 | 3.073332  | -1.922515 | 2.711044  |
| H | 0 | 2.393717  | -0.337300 | 2.341346  |
| H | 0 | 2.234992  | -3.523046 | -0.614031 |
| H | 0 | 2.961264  | -3.841696 | 0.969667  |
| H | 0 | 1.209281  | -3.615718 | 0.826629  |
| H | 0 | -1.515729 | -0.293006 | 0.599594  |

Energy + ZPE = -1148.064264

Free energy = -1148.112657

Free energy in DCM = -1148.451777

Free energy in heptane = -1148.453913

Number of imaginary frequencies = 1 (-408.84)

## Diels-Alder reaction with Vinylborane (17a)

### TS 17a+cpReN

|    |   |           |           |           |
|----|---|-----------|-----------|-----------|
| C  | 0 | -2.245410 | 2.419605  | 0.338633  |
| C  | 0 | -2.333705 | 2.997826  | -0.919435 |
| C  | 0 | -3.514638 | 1.648196  | 0.579624  |
| C  | 0 | -3.388101 | 2.396414  | -1.628966 |
| C  | 0 | -3.942670 | 1.362189  | -0.849332 |
| H  | 0 | -1.550827 | 2.706854  | 1.119031  |
| H  | 0 | -1.644898 | 3.727781  | -1.328547 |
| H  | 0 | -3.435454 | 0.784528  | 1.241127  |
| H  | 0 | -4.254725 | 2.338758  | 1.019673  |
| H  | 0 | -3.638834 | 2.601228  | -2.664271 |
| H  | 0 | -4.909245 | 0.921005  | -1.077038 |
| C  | 0 | -2.677799 | -0.200333 | -1.178438 |
| Cl | 0 | -0.085098 | 1.071628  | -2.711044 |
| B  | 0 | -0.183513 | 0.567331  | -0.966293 |
| C  | 0 | 1.161858  | 0.524507  | -0.121997 |
| C  | 0 | 2.183140  | 1.669681  | -0.347520 |
| C  | 0 | 3.457191  | 1.419417  | 0.477057  |
| C  | 0 | 4.193770  | 0.122849  | 0.085702  |
| C  | 0 | 3.294907  | -1.056094 | -0.272012 |
| C  | 0 | 1.791614  | -0.861219 | -0.404879 |
| C  | 0 | 1.589891  | 3.041838  | -0.004371 |
| C  | 0 | 2.353507  | -1.772865 | 0.678751  |
| C  | 0 | 2.282451  | -1.406425 | 2.151080  |
| C  | 0 | 2.181094  | -3.268563 | 0.450541  |
| C  | 0 | -1.508495 | 0.043549  | -0.438322 |
| H  | 0 | -2.620559 | -0.163616 | -2.262329 |
| H  | 0 | -3.386576 | -0.937590 | -0.803618 |
| H  | 0 | 0.867181  | 0.563189  | 0.939105  |
| H  | 0 | 2.457543  | 1.672937  | -1.412292 |
| H  | 0 | 3.188186  | 1.410766  | 1.542681  |
| H  | 0 | 4.148460  | 2.264138  | 0.353599  |
| H  | 0 | 4.909245  | -0.155257 | 0.872408  |
| H  | 0 | 4.798209  | 0.339739  | -0.805325 |
| H  | 0 | 3.743121  | -1.708510 | -1.021183 |
| H  | 0 | 1.342906  | -1.399292 | -1.239769 |
| H  | 0 | 1.283733  | 3.085242  | 1.050187  |
| H  | 0 | 2.322933  | 3.841696  | -0.165812 |
| H  | 0 | 0.712873  | 3.266394  | -0.620646 |
| H  | 0 | 1.321705  | -1.720328 | 2.581640  |

### TS 17a+cpReX

|    |   |           |           |           |
|----|---|-----------|-----------|-----------|
| C  | 0 | -1.125265 | 2.090295  | 3.375765  |
| C  | 0 | -0.324090 | 3.122354  | 2.849035  |
| C  | 0 | -2.267341 | 1.906552  | 2.395287  |
| C  | 0 | -0.599322 | 3.264199  | 1.476643  |
| C  | 0 | -1.634877 | 2.406182  | 1.129760  |
| H  | 0 | -1.257954 | 1.939480  | 4.443572  |
| H  | 0 | 0.474281  | 3.628730  | 3.382109  |
| H  | 0 | -2.704520 | 0.909267  | 2.347133  |
| H  | 0 | -3.067453 | 2.611748  | 2.680161  |
| H  | 0 | -0.039766 | 3.886644  | 0.786156  |
| H  | 0 | -2.094857 | 2.335222  | 0.151757  |
| Cl | 0 | -2.269047 | -1.526106 | 1.245320  |
| B  | 0 | -0.917112 | -0.533479 | 0.529908  |
| C  | 0 | -0.570610 | -0.757738 | -1.003267 |
| C  | 0 | -1.761798 | -0.944046 | -1.979750 |
| C  | 0 | -1.243933 | -1.217239 | -3.401441 |
| C  | 0 | -0.416913 | -2.514198 | -3.508389 |
| C  | 0 | 0.482301  | -2.816889 | -2.313489 |
| C  | 0 | 0.394739  | -1.966970 | -1.054033 |
| C  | 0 | -2.702492 | 0.267741  | -1.976943 |
| C  | 0 | 1.677898  | -1.991113 | -1.874839 |
| C  | 0 | 2.140568  | -0.784719 | -2.673392 |
| C  | 0 | 2.843567  | -2.763860 | -1.272387 |
| C  | 0 | -0.074199 | 0.337752  | 1.445903  |
| C  | 0 | -0.100720 | 0.391358  | 2.848699  |
| H  | 0 | -0.023737 | 0.139496  | -1.334619 |
| H  | 0 | -2.335945 | -1.821687 | -1.649564 |
| H  | 0 | -0.657109 | -0.349095 | -3.733500 |
| H  | 0 | -2.091212 | -1.285560 | -4.097198 |
| H  | 0 | -1.122468 | -3.351822 | -3.591138 |
| H  | 0 | 0.160592  | -2.516146 | -4.443572 |
| H  | 0 | 0.598923  | -3.886644 | -2.140745 |
| H  | 0 | 0.457410  | -2.534296 | -0.125587 |
| H  | 0 | -2.165617 | 1.183362  | -2.261796 |
| H  | 0 | -3.523229 | 0.133244  | -2.692099 |
| H  | 0 | -3.149946 | 0.427812  | -0.989547 |
| H  | 0 | 2.712237  | -0.094981 | -2.037631 |
| H  | 0 | 2.803622  | -1.100354 | -3.489485 |
| H  | 0 | 1.321512  | -0.218610 | -3.120516 |
| H  | 0 | 2.499068  | -3.632163 | -0.699284 |
| H  | 0 | 3.523229  | -3.129250 | -2.054094 |
| H  | 0 | 3.429427  | -2.129015 | -0.594085 |
| H  | 0 | 0.751929  | 0.862493  | 0.965098  |

|   |   |           |           |          |
|---|---|-----------|-----------|----------|
| H | 0 | -0.754392 | -0.300595 | 3.376272 |
| H | 0 | 0.813505  | 0.625547  | 3.387869 |

Energy + ZPE = -1148.064286  
 Free energy = -1148.112219  
 Free energy in DCM = -1148.450574  
 Free energy in heptane = -1148.453270  
 Number of imaginary frequencies = 1 (-408.54)

Energy + ZPE = -1148.065334  
 Free energy = -1148.113469  
 Free energy in DCM = -1148.452058  
 Free energy in heptane = -1148.454274  
 Number of imaginary frequencies = 1 (-399.87)

**TS 17a+cpSiN**

|    |   |           |           |           |
|----|---|-----------|-----------|-----------|
| C  | 0 | 2.859485  | -1.579050 | 3.126579  |
| C  | 0 | 2.959813  | -0.173731 | 3.164725  |
| C  | 0 | 1.375537  | -1.888159 | 3.229397  |
| C  | 0 | 1.715589  | 0.390102  | 2.832805  |
| C  | 0 | 0.790035  | -0.627982 | 2.651943  |
| H  | 0 | 3.608114  | -2.224287 | 3.578221  |
| H  | 0 | 3.882199  | 0.383130  | 3.289868  |
| H  | 0 | 1.045258  | -2.824445 | 2.778201  |
| H  | 0 | 1.114138  | -1.923854 | 4.301110  |
| H  | 0 | 1.536532  | 1.443605  | 2.652025  |
| H  | 0 | -0.260330 | -0.494087 | 2.421824  |
| Cl | 0 | 2.851257  | 0.874502  | -0.347815 |
| B  | 0 | 1.548938  | -0.394716 | -0.227351 |
| C  | 0 | 0.181763  | -0.103869 | -0.983730 |
| C  | 0 | 1.863729  | -1.676755 | 0.520275  |
| C  | 0 | 0.362509  | -0.038712 | -2.531845 |
| C  | 0 | -0.499749 | 1.170851  | -0.448290 |
| C  | 0 | 3.074759  | -2.015534 | 1.147034  |
| C  | 0 | -0.990255 | 0.230884  | -3.209755 |
| C  | 0 | -1.413968 | 1.987133  | -1.350008 |
| C  | 0 | 0.998964  | -1.317610 | -3.092878 |
| C  | 0 | -1.991407 | 1.268123  | -0.145775 |
| C  | 0 | -1.615449 | 1.581623  | -2.807494 |
| C  | 0 | -2.922462 | 0.078808  | -0.307247 |
| C  | 0 | -2.380765 | 2.146495  | 1.035791  |
| H  | 0 | -0.470193 | -0.970200 | -0.787859 |
| H  | 0 | 1.090476  | -2.446469 | 0.514176  |
| H  | 0 | 1.032739  | 0.804884  | -2.753265 |
| H  | 0 | 0.126939  | 1.768494  | 0.211502  |
| H  | 0 | 3.955239  | -1.419301 | 0.926304  |
| H  | 0 | 3.293013  | -3.067354 | 1.327418  |
| H  | 0 | -1.669416 | -0.601262 | -2.976954 |
| H  | 0 | -0.865429 | 0.215035  | -4.301110 |
| H  | 0 | -1.341748 | 3.067354  | -1.224627 |
| H  | 0 | 0.376428  | -2.195514 | -2.873520 |
| H  | 0 | 1.110745  | -1.255532 | -4.182279 |
| H  | 0 | 1.991757  | -1.501959 | -2.666559 |
| H  | 0 | -2.681446 | 1.597452  | -3.075177 |
| H  | 0 | -1.142126 | 2.361631  | -3.418806 |
| H  | 0 | -2.914116 | -0.548149 | 0.595177  |
| H  | 0 | -3.955239 | 0.420972  | -0.454536 |
| H  | 0 | -2.667333 | -0.561531 | -1.153269 |
| H  | 0 | -1.704738 | 3.002442  | 1.142583  |
| H  | 0 | -3.399495 | 2.540337  | 0.919079  |
| H  | 0 | -2.353315 | 1.581378  | 1.978110  |

**TS 17a+cpSiX**

|    |   |           |           |           |
|----|---|-----------|-----------|-----------|
| C  | 0 | -1.282182 | 0.912134  | 2.330620  |
| C  | 0 | -1.209973 | 2.299737  | 2.328872  |
| C  | 0 | -2.725440 | 0.524089  | 2.195664  |
| C  | 0 | -2.443855 | 2.825000  | 1.904371  |
| C  | 0 | -3.293757 | 1.764100  | 1.533362  |
| H  | 0 | -0.498524 | 0.238763  | 2.657572  |
| H  | 0 | -0.321283 | 2.883587  | 2.544808  |
| H  | 0 | -2.918502 | -0.423076 | 1.692524  |
| H  | 0 | -3.158047 | 0.460776  | 3.209248  |
| H  | 0 | -2.656189 | 3.878708  | 1.754242  |
| H  | 0 | -4.362042 | 1.894477  | 1.384039  |
| Cl | 0 | -1.948702 | -1.928250 | -0.311602 |
| B  | 0 | -0.784107 | -0.522409 | -0.274293 |
| C  | 0 | 0.763583  | -0.878382 | -0.302541 |
| C  | 0 | -1.333909 | 0.891484  | -0.277886 |
| C  | 0 | 1.193709  | -1.579889 | -1.627217 |
| C  | 0 | 1.162891  | -1.715485 | 0.929350  |
| C  | 0 | -2.671845 | 1.305303  | -0.372383 |
| C  | 0 | 2.698469  | -1.891613 | -1.595364 |
| C  | 0 | 2.342377  | -2.673720 | 0.851552  |
| C  | 0 | 0.844912  | -0.737329 | -2.861766 |
| C  | 0 | 2.420118  | -1.457281 | 1.753751  |
| C  | 0 | 3.097823  | -2.857488 | -0.461126 |
| C  | 0 | 3.356982  | -0.301555 | 1.447204  |
| C  | 0 | 2.308756  | -1.725565 | 3.248775  |
| H  | 0 | 1.302362  | 0.081921  | -0.274775 |
| H  | 0 | -0.587582 | 1.685058  | -0.323946 |
| H  | 0 | 0.646314  | -2.531614 | -1.693752 |
| H  | 0 | 0.320332  | -2.091230 | 1.508074  |
| H  | 0 | -3.432900 | 0.549506  | -0.556767 |
| H  | 0 | -2.898453 | 2.271730  | -0.815394 |
| H  | 0 | 3.249614  | -0.944040 | -1.517295 |
| H  | 0 | 3.003011  | -2.333472 | -2.553832 |
| H  | 0 | 2.209979  | -3.612115 | 1.389673  |
| H  | 0 | 1.157798  | -1.241646 | -3.784185 |
| H  | 0 | -0.231998 | -0.546525 | -2.935737 |
| H  | 0 | 1.351592  | 0.236560  | -2.828946 |
| H  | 0 | 4.183911  | -2.815995 | -0.297474 |
| H  | 0 | 2.886348  | -3.878708 | -0.805294 |
| H  | 0 | 4.362042  | -0.512774 | 1.835423  |
| H  | 0 | 3.457151  | -0.092271 | 0.380605  |
| H  | 0 | 3.008128  | 0.620127  | 1.932822  |
| H  | 0 | 1.627143  | -2.557324 | 3.459781  |
| H  | 0 | 3.286444  | -1.979362 | 3.680310  |
| H  | 0 | 1.933441  | -0.842150 | 3.784185  |

Energy + ZPE = -1148.065229  
 Free energy = -1148.113310  
 Free energy in DCM = -1148.451055

Free energy in heptane = -1148.453662  
Number of imaginary frequencies = 1 (-401.20)

**Product 17a+cpReN**

|    |   |           |           |           |
|----|---|-----------|-----------|-----------|
| C  | 0 | -1.444175 | -0.993275 | 2.792183  |
| C  | 0 | -1.471031 | 0.520151  | 2.971910  |
| C  | 0 | -2.961155 | -1.287369 | 2.729358  |
| C  | 0 | -1.038052 | -1.258868 | 1.291411  |
| C  | 0 | -2.531018 | 0.985944  | 2.295345  |
| C  | 0 | -3.226317 | -0.207821 | 1.654436  |
| C  | 0 | -2.281521 | -0.701243 | 0.504727  |
| B  | 0 | 0.386296  | -0.817153 | 0.796166  |
| Cl | 0 | 1.708642  | -0.718823 | 2.015158  |
| C  | 0 | 0.735117  | -0.475246 | -0.706237 |
| C  | 0 | 2.076262  | -1.038999 | -1.246784 |
| C  | 0 | 0.671587  | 1.069742  | -0.802623 |
| C  | 0 | 2.331970  | -0.526700 | -2.672671 |
| C  | 0 | 1.515309  | 1.792085  | -1.842666 |
| C  | 0 | 2.093847  | -2.573028 | -1.211544 |
| C  | 0 | 0.001357  | 1.818410  | -1.948677 |
| C  | 0 | 2.456818  | 1.008327  | -2.752145 |
| C  | 0 | -0.728766 | 1.090964  | -3.064693 |
| C  | 0 | -0.671616 | 3.134770  | -1.582812 |
| H  | 0 | -0.851908 | -1.554275 | 3.516946  |
| H  | 0 | -0.698846 | 1.097086  | 3.469924  |
| H  | 0 | -3.196541 | -2.305884 | 2.395629  |
| H  | 0 | -3.474838 | -1.081113 | 3.673594  |
| H  | 0 | -1.012021 | -2.356427 | 1.146774  |
| H  | 0 | -2.798925 | 2.024072  | 2.123212  |
| H  | 0 | -4.262396 | -0.053780 | 1.341902  |
| H  | 0 | -2.028519 | 0.113315  | -0.179703 |
| H  | 0 | -2.767681 | -1.487861 | -0.083753 |
| H  | 0 | -0.066974 | -0.899073 | -1.329927 |
| H  | 0 | 2.884583  | -0.669433 | -0.600318 |
| H  | 0 | 0.603728  | 1.585869  | 0.155426  |
| H  | 0 | 1.528313  | -0.890707 | -3.327502 |
| H  | 0 | 3.256655  | -0.972510 | -3.062918 |
| H  | 0 | 1.948573  | 2.734243  | -1.508039 |
| H  | 0 | 3.041422  | -2.965722 | -1.599156 |
| H  | 0 | 1.971265  | -2.958757 | -0.192396 |
| H  | 0 | 1.286498  | -2.990130 | -1.828416 |
| H  | 0 | 2.355394  | 1.340576  | -3.794678 |
| H  | 0 | 3.478869  | 1.274508  | -2.451154 |
| H  | 0 | -1.764555 | 0.872842  | -2.771791 |
| H  | 0 | -0.770319 | 1.719873  | -3.963302 |
| H  | 0 | -0.262341 | 0.146409  | -3.350149 |
| H  | 0 | -0.137465 | 3.651862  | -0.777667 |
| H  | 0 | -0.707943 | 3.812028  | -2.446420 |
| H  | 0 | -1.704105 | 2.971670  | -1.245741 |

Energy + ZPE = -1148.108772

Free energy = -1148.156737

Free energy in DCM = -1148.498333

Free energy in heptane = -1148.501645

Number of imaginary frequencies = 0

**Product 17a+cpReX**

|    |   |           |           |           |
|----|---|-----------|-----------|-----------|
| C  | 0 | 1.908410  | 0.445181  | 3.694019  |
| C  | 0 | 1.931916  | 1.963977  | 3.627066  |
| C  | 0 | 0.383924  | 0.195754  | 3.759372  |
| C  | 0 | 2.211287  | -0.082070 | 2.246763  |
| C  | 0 | 0.847401  | 2.355121  | 2.942072  |
| C  | 0 | 0.082229  | 1.102934  | 2.545703  |
| C  | 0 | 0.983858  | 0.399122  | 1.410949  |
| B  | 0 | 0.115394  | -0.627404 | 0.597618  |
| Cl | 0 | 0.070373  | -2.360820 | 1.078179  |
| C  | 0 | -0.695537 | -0.182159 | -0.683056 |
| C  | 0 | -2.071944 | -0.849314 | -0.928556 |
| C  | 0 | 0.286337  | -0.417464 | -1.859283 |
| C  | 0 | -2.651026 | -0.395675 | -2.278523 |
| C  | 0 | -0.263561 | -0.689420 | -3.251779 |
| C  | 0 | -3.054402 | -0.542104 | 0.209581  |
| C  | 0 | 0.513795  | 0.586529  | -2.982366 |
| C  | 0 | -1.768508 | -0.786108 | -3.481442 |
| C  | 0 | -0.163658 | 1.945934  | -2.987737 |
| C  | 0 | 1.925159  | 0.643674  | -3.551686 |
| H  | 0 | 2.523364  | -0.014801 | 4.471565  |
| H  | 0 | 2.750002  | 2.588310  | 3.973250  |
| H  | 0 | 0.105410  | -0.853010 | 3.611791  |
| H  | 0 | -0.068978 | 0.573567  | 4.681441  |
| H  | 0 | 2.286582  | -1.173868 | 2.260597  |
| H  | 0 | 3.153860  | 0.312335  | 1.854417  |
| H  | 0 | 0.601494  | 3.358610  | 2.608076  |
| H  | 0 | -0.966674 | 1.246491  | 2.274173  |
| H  | 0 | 1.280878  | 1.184165  | 0.703943  |
| H  | 0 | -0.871769 | 0.901281  | -0.589747 |
| H  | 0 | -1.920225 | -1.937353 | -0.968787 |
| H  | 0 | 1.172459  | -1.002484 | -1.608603 |
| H  | 0 | -2.811071 | 0.690905  | -2.245513 |
| H  | 0 | -3.646866 | -0.836887 | -2.418282 |
| H  | 0 | 0.292832  | -1.427775 | -3.828453 |
| H  | 0 | -3.231915 | 0.538665  | 0.294298  |
| H  | 0 | -4.024964 | -1.021700 | 0.034960  |
| H  | 0 | -2.680242 | -0.898143 | 1.176549  |
| H  | 0 | -2.063825 | -0.207237 | -4.367572 |
| H  | 0 | -1.982651 | -1.835394 | -3.724706 |
| H  | 0 | -1.171415 | 1.933475  | -2.568706 |
| H  | 0 | 0.425146  | 2.672252  | -2.411475 |
| H  | 0 | -0.239768 | 2.329345  | -4.013365 |
| H  | 0 | 2.405363  | -0.341419 | -3.541758 |
| H  | 0 | 1.918106  | 0.999488  | -4.590537 |
| H  | 0 | 2.557428  | 1.328677  | -2.971199 |

Energy + ZPE = -1148.108778

Free energy = -1148.156389

Free energy in DCM = -1148.497758

Free energy in heptane = -1148.501518

Number of imaginary frequencies = 0

**Product 17a+cpSiN**

|   |   |           |           |          |
|---|---|-----------|-----------|----------|
| C | 0 | -0.535877 | -1.254243 | 3.336436 |
|---|---|-----------|-----------|----------|

|    |   |           |           |           |    |   |           |           |           |
|----|---|-----------|-----------|-----------|----|---|-----------|-----------|-----------|
| C  | 0 | -0.506400 | 0.266278  | 3.389308  | C  | 0 | -2.207651 | 3.614572  | 1.713828  |
| C  | 0 | -2.062856 | -1.494691 | 3.323965  | C  | 0 | -2.986164 | 2.375734  | 1.298981  |
| C  | 0 | -0.167061 | -1.651459 | 1.863167  | B  | 0 | -0.493643 | -0.276401 | 0.621503  |
| C  | 0 | -1.560907 | 0.715213  | 2.692612  | C  | 0 | -2.158423 | 1.668861  | 0.170681  |
| C  | 0 | -2.311924 | -0.499520 | 2.166887  | Cl | 0 | -0.826961 | -1.546172 | 1.850587  |
| C  | 0 | -1.404009 | -1.171532 | 1.033199  | C  | 0 | 0.225949  | -0.704781 | -0.719206 |
| B  | 0 | -1.189427 | -0.222587 | -0.203975 | C  | 0 | -0.223343 | -2.040801 | -1.365312 |
| Cl | 0 | -2.615609 | -0.067801 | -1.299926 | C  | 0 | 1.737963  | -0.704465 | -0.379884 |
| C  | 0 | 0.146900  | 0.512024  | -0.606589 | C  | 0 | 0.649455  | -2.356202 | -2.590639 |
| C  | 0 | 0.026021  | 1.874431  | -1.335725 | C  | 0 | 2.683267  | -1.601035 | -1.166755 |
| C  | 0 | 0.900493  | -0.541624 | -1.461526 | C  | 0 | -1.707404 | -2.007925 | -1.753986 |
| C  | 0 | 1.411801  | 2.359709  | -1.790466 | C  | 0 | 2.803662  | -0.091864 | -1.279851 |
| C  | 0 | 1.878437  | -0.080382 | -2.532715 | C  | 0 | 2.141104  | -2.536024 | -2.244055 |
| C  | 0 | -0.649805 | 2.931087  | -0.451919 | C  | 0 | 2.442393  | 0.638550  | -2.561457 |
| C  | 0 | 2.387765  | -0.844001 | -1.323285 | C  | 0 | 3.994006  | 0.540232  | -0.571022 |
| C  | 0 | 2.087740  | 1.407782  | -2.796245 | H  | 0 | -0.533158 | 1.192202  | 3.165652  |
| C  | 0 | 3.248472  | -0.171014 | -0.268332 | H  | 0 | -0.291521 | 3.808308  | 2.730669  |
| C  | 0 | 2.800848  | -2.289010 | -1.568944 | H  | 0 | -2.970851 | 0.398599  | 2.319010  |
| H  | 0 | 0.047806  | -1.775065 | 4.099659  | H  | 0 | -3.108212 | 1.794298  | 3.430700  |
| H  | 0 | 0.296497  | 0.856501  | 3.820582  | H  | 0 | -0.002761 | 1.820286  | 0.534386  |
| H  | 0 | -2.346712 | -2.526089 | 3.082244  | H  | 0 | -2.451494 | 4.629523  | 1.415009  |
| H  | 0 | -2.548135 | -1.185360 | 4.255347  | H  | 0 | -4.037196 | 2.526833  | 1.039053  |
| H  | 0 | 0.774617  | -1.192585 | 1.549809  | H  | 0 | -2.726873 | 0.813418  | -0.216020 |
| H  | 0 | -0.043979 | -2.737346 | 1.777007  | H  | 0 | -1.945579 | 2.328101  | -0.675786 |
| H  | 0 | -1.795683 | 1.745643  | 2.444716  | H  | 0 | 0.034642  | 0.091022  | -1.456002 |
| H  | 0 | -3.344095 | -0.337029 | 1.851457  | H  | 0 | -0.078719 | -2.840924 | -0.625457 |
| H  | 0 | -1.969706 | -2.047361 | 0.686874  | H  | 0 | 1.970263  | -0.637840 | 0.683817  |
| H  | 0 | 0.716012  | 0.685963  | 0.318959  | H  | 0 | 0.511943  | -1.559621 | -3.335009 |
| H  | 0 | -0.595023 | 1.727331  | -2.230603 | H  | 0 | 0.289778  | -3.275589 | -3.071632 |
| H  | 0 | 0.305614  | -1.409461 | -1.750814 | H  | 0 | 3.475377  | -2.061607 | -0.577008 |
| H  | 0 | 2.043142  | 2.508331  | -0.903516 | H  | 0 | -2.016379 | -2.953813 | -2.214821 |
| H  | 0 | 1.319077  | 3.350019  | -2.256028 | H  | 0 | -2.351590 | -1.841488 | -0.882523 |
| H  | 0 | 1.865142  | -0.668421 | -3.449953 | H  | 0 | -1.907472 | -1.206989 | -2.478371 |
| H  | 0 | -0.074541 | 3.101292  | 0.467829  | H  | 0 | 2.749554  | -2.471408 | -3.156772 |
| H  | 0 | -0.727428 | 3.891149  | -0.976166 | H  | 0 | 2.273766  | -3.559024 | -1.867594 |
| H  | 0 | -1.663307 | 2.629648  | -0.164202 | H  | 0 | 3.290728  | 0.627628  | -3.257778 |
| H  | 0 | 3.158775  | 1.640868  | -2.874548 | H  | 0 | 1.586828  | 0.205881  | -3.083034 |
| H  | 0 | 1.662923  | 1.614607  | -3.787581 | H  | 0 | 2.205528  | 1.690502  | -2.352747 |
| H  | 0 | 3.217342  | -0.735467 | 0.673240  | H  | 0 | 4.244411  | 0.006454  | 0.352875  |
| H  | 0 | 4.296076  | -0.140736 | -0.594530 | H  | 0 | 4.885758  | 0.531570  | -1.211788 |
| H  | 0 | 2.945329  | 0.853801  | -0.047254 | H  | 0 | 3.786705  | 1.585694  | -0.306183 |
| H  | 0 | 2.181270  | -2.761101 | -2.339916 |    |   |           |           |           |
| H  | 0 | 3.846191  | -2.349866 | -1.899749 |    |   |           |           |           |
| H  | 0 | 2.707459  | -2.888001 | -0.653217 |    |   |           |           |           |

Energy + ZPE = -1148.108229

Free energy = -1148.155655

Free energy in DCM = -1148.499266

Free energy in heptane = -1148.502439

Number of imaginary frequencies = 0

Energy + ZPE = -1148.108402

Free energy = -1148.155842

Free energy in DCM = -1148.498100

Free energy in heptane = -1148.501719

Number of imaginary frequencies = 0

### Diels-Alder reaction with Vinylborane (17b)

#### Product 17a+cpSiX

|   |   |           |          |          |
|---|---|-----------|----------|----------|
| C | 0 | -1.151187 | 1.677072 | 2.407508 |
| C | 0 | -1.119495 | 3.199853 | 2.378894 |
| C | 0 | -2.677437 | 1.439790 | 2.489219 |
| C | 0 | -0.839518 | 1.225916 | 0.928031 |

#### TS 17b+cpReN

|   |   |           |          |          |
|---|---|-----------|----------|----------|
| C | 0 | -1.233954 | 0.554967 | 3.172652 |
| C | 0 | -1.233954 | 1.940375 | 3.172652 |
| C | 0 | -2.664615 | 0.091136 | 3.172652 |
| C | 0 | -2.523463 | 2.400860 | 2.849611 |



|    |   |           |           |           |    |   |           |           |           |
|----|---|-----------|-----------|-----------|----|---|-----------|-----------|-----------|
| C  | 0 | -3.352360 | 1.299172  | 2.557438  | H  | 0 | 0.701783  | -1.491676 | 3.410818  |
| H  | 0 | -0.388130 | -0.078333 | 3.412642  | H  | 0 | 0.601067  | -0.583592 | 4.928918  |
| H  | 0 | -0.364633 | 2.572562  | 3.308355  | H  | 0 | 0.895162  | 2.786561  | 3.204022  |
| H  | 0 | -2.857905 | -0.868536 | 2.691411  | H  | 0 | -0.744899 | 0.716624  | 2.946731  |
| H  | 0 | -2.999181 | 0.010790  | 4.221326  | Br | 0 | 0.387738  | -2.786561 | 1.061715  |
| H  | 0 | -2.794781 | 3.441532  | 2.709610  | B  | 0 | 0.563023  | -0.878388 | 0.561625  |
| H  | 0 | -4.435486 | 1.384819  | 2.534985  | C  | 0 | -0.424688 | -0.338513 | -0.552695 |
| C  | 0 | -2.936988 | 0.882822  | 0.622321  | C  | 0 | 1.707228  | -0.080222 | 1.151590  |
| C  | 0 | -1.682473 | 0.249348  | 0.577481  | C  | 0 | -1.892468 | -0.839787 | -0.504015 |
| B  | 0 | -0.360570 | 0.897159  | 0.225358  | C  | 0 | 0.229724  | -0.676696 | -1.914053 |
| Br | 0 | -0.342716 | 2.859061  | -0.009851 | C  | 0 | 2.776984  | -0.569478 | 1.920099  |
| C  | 0 | 0.963330  | 0.106645  | -0.140931 | C  | 0 | -2.687521 | -0.240355 | -1.674787 |
| C  | 0 | 2.317275  | 0.750729  | 0.257471  | C  | 0 | -0.637845 | -0.814884 | -3.156975 |
| C  | 0 | 0.890778  | -0.136109 | -1.667973 | C  | 0 | -2.568874 | -0.523512 | 0.835473  |
| C  | 0 | 3.482026  | -0.121059 | -0.240029 | C  | 0 | 0.363996  | 0.321272  | -3.055584 |
| C  | 0 | 2.169737  | -0.342306 | -2.465903 | C  | 0 | -2.154592 | -0.678538 | -3.054347 |
| C  | 0 | 2.423070  | 0.982875  | 1.769380  | C  | 0 | -0.090208 | 1.763578  | -2.913387 |
| C  | 0 | 1.174783  | -1.480041 | -2.324812 | C  | 0 | 1.614742  | 0.192972  | -3.914459 |
| C  | 0 | 3.527741  | -0.255433 | -1.776260 | H  | 0 | -0.455559 | 0.756840  | -0.436625 |
| C  | 0 | 1.501465  | -2.716061 | -1.504884 | H  | 0 | 1.789396  | 0.954493  | 0.816605  |
| C  | 0 | 0.351216  | -1.809627 | -3.562315 | H  | 0 | -1.875159 | -1.932993 | -0.620073 |
| H  | 0 | -3.018243 | 1.881040  | 0.202213  | H  | 0 | 1.045989  | -1.396249 | -1.854104 |
| H  | 0 | -3.830746 | 0.274966  | 0.486757  | H  | 0 | 2.844346  | -1.646500 | 2.061834  |
| H  | 0 | -1.680748 | -0.834954 | 0.703055  | H  | 0 | 3.742199  | -0.072803 | 1.863956  |
| H  | 0 | 0.905580  | -0.866007 | 0.373923  | H  | 0 | -2.679906 | 0.854776  | -1.580074 |
| H  | 0 | 2.379014  | 1.729722  | -0.239125 | H  | 0 | -3.742199 | -0.537414 | -1.598035 |
| H  | 0 | 0.134132  | 0.456882  | -2.181156 | H  | 0 | -0.336370 | -1.606292 | -3.842910 |
| H  | 0 | 3.409068  | -1.108334 | 0.238055  | H  | 0 | -2.556364 | 0.555592  | 1.043186  |
| H  | 0 | 4.435486  | 0.304019  | 0.101609  | H  | 0 | -3.617274 | -0.846019 | 0.835929  |
| H  | 0 | 2.174348  | 0.116618  | -3.454307 | H  | 0 | -2.063990 | -1.039871 | 1.659333  |
| H  | 0 | 2.306104  | 0.042157  | 2.325163  | H  | 0 | -2.573883 | -1.670019 | -3.271437 |
| H  | 0 | 3.399565  | 1.404391  | 2.037731  | H  | 0 | -2.542457 | -0.012059 | -3.837596 |
| H  | 0 | 1.653658  | 1.681455  | 2.114074  | H  | 0 | 0.693810  | 2.372045  | -2.442503 |
| H  | 0 | 4.167241  | -1.102891 | -2.061097 | H  | 0 | -0.290375 | 2.198350  | -3.901399 |
| H  | 0 | 4.024570  | 0.640151  | -2.172732 | H  | 0 | -0.998105 | 1.877673  | -2.317992 |
| H  | 0 | 0.581191  | -3.211605 | -1.166651 | H  | 0 | 1.937036  | -0.850605 | -4.004002 |
| H  | 0 | 2.056786  | -3.441532 | -2.113757 | H  | 0 | 1.440218  | 0.576146  | -4.928918 |
| H  | 0 | 2.105328  | -2.504044 | -0.620629 | H  | 0 | 2.449027  | 0.762741  | -3.483678 |
| H  | 0 | 0.121981  | -0.910377 | -4.145243 |    |   |           |           |           |
| H  | 0 | 0.887336  | -2.505909 | -4.221326 |    |   |           |           |           |
| H  | 0 | -0.602660 | -2.280279 | -3.288437 |    |   |           |           |           |

Energy + ZPE = -3259.575356  
Free energy = -3259.624288  
Free energy in DCM = -3259.962387  
Free energy in heptane = -3259.964607  
Number of imaginary frequencies = 1 (-398.72)

#### TS 17b+cpReX

|   |   |          |           |          |
|---|---|----------|-----------|----------|
| C | 0 | 2.390770 | -0.116459 | 3.877037 |
| C | 0 | 2.390770 | 1.292886  | 3.877037 |
| C | 0 | 0.932217 | -0.533521 | 3.877037 |
| C | 0 | 1.137639 | 1.754200  | 3.433631 |
| C | 0 | 0.295506 | 0.666968  | 3.244001 |
| H | 0 | 3.152432 | -0.700317 | 4.386564 |
| H | 0 | 3.260202 | 1.918240  | 4.053397 |

Energy + ZPE = -3259.576256  
Free energy = -3259.625383  
Free energy in DCM = -3259.961937  
Free energy in heptane = -3259.964800  
Number of imaginary frequencies = 1 (-403.70)

#### TS 17b+cpSiN

|   |   |          |           |          |
|---|---|----------|-----------|----------|
| C | 0 | 2.953415 | -1.550556 | 3.063486 |
| C | 0 | 3.044071 | -0.143716 | 3.077123 |
| C | 0 | 1.480246 | -1.870036 | 3.262765 |
| C | 0 | 1.774727 | 0.407786  | 2.823366 |
| C | 0 | 0.847528 | -0.616548 | 2.723450 |
| H | 0 | 3.731927 | -2.179543 | 3.486961 |
| H | 0 | 3.967307 | 0.422502  | 3.133211 |
| H | 0 | 1.129039 | -2.808564 | 2.831822 |
| H | 0 | 1.288071 | -1.910349 | 4.348819 |
| H | 0 | 1.578143 | 1.457737  | 2.642064 |

|    |   |           |           |           |   |   |           |           |           |
|----|---|-----------|-----------|-----------|---|---|-----------|-----------|-----------|
| H  | 0 | -0.215571 | -0.494395 | 2.552450  | C | 0 | 0.793041  | -0.855289 | -0.303707 |
| Br | 0 | 2.921114  | 0.954760  | -0.322855 | C | 0 | -1.313839 | 0.925737  | -0.278078 |
| B  | 0 | 1.511229  | -0.431562 | -0.231595 | C | 0 | 1.200961  | -1.567101 | -1.630347 |
| C  | 0 | 0.167463  | -0.112927 | -1.008803 | C | 0 | 1.175998  | -1.711414 | 0.919525  |
| C  | 0 | 1.839764  | -1.706053 | 0.510826  | C | 0 | -2.664476 | 1.298781  | -0.373042 |
| C  | 0 | 0.393246  | -0.023612 | -2.550615 | C | 0 | 2.703022  | -1.890355 | -1.608162 |
| C  | 0 | -0.503180 | 1.166797  | -0.474110 | C | 0 | 2.341212  | -2.686103 | 0.833915  |
| C  | 0 | 3.072075  | -2.033971 | 1.103654  | C | 0 | 0.841473  | -0.733953 | -2.867507 |
| C  | 0 | -0.937579 | 0.270182  | -3.261294 | C | 0 | 2.431787  | -1.482227 | 1.751981  |
| C  | 0 | -1.384262 | 2.005887  | -1.386858 | C | 0 | 3.098894  | -2.864071 | -0.479186 |
| C  | 0 | 1.038625  | -1.296390 | -3.114943 | C | 0 | 3.389240  | -0.339194 | 1.461249  |
| C  | 0 | -1.997798 | 1.285389  | -0.201526 | C | 0 | 2.309992  | -1.765684 | 3.243217  |
| C  | 0 | -1.562064 | 1.620503  | -2.852136 | H | 0 | 1.351784  | 0.093785  | -0.274248 |
| C  | 0 | -2.943924 | 0.112964  | -0.395973 | H | 0 | -0.586657 | 1.737025  | -0.326759 |
| C  | 0 | -2.398357 | 2.158983  | 0.979596  | H | 0 | 0.641487  | -2.512846 | -1.679196 |
| H  | 0 | -0.502401 | -0.972042 | -0.843116 | H | 0 | 0.322468  | -2.085349 | 1.482330  |
| H  | 0 | 1.065000  | -2.474009 | 0.542721  | H | 0 | -3.393640 | 0.513294  | -0.562653 |
| H  | 0 | 1.078797  | 0.817059  | -2.732568 | H | 0 | -2.922380 | 2.255619  | -0.819638 |
| H  | 0 | 0.124515  | 1.748609  | 0.198228  | H | 0 | 3.261136  | -0.946940 | -1.528066 |
| H  | 0 | 3.942799  | -1.445375 | 0.830073  | H | 0 | 3.000684  | -2.330652 | -2.569598 |
| H  | 0 | 3.293820  | -3.083190 | 1.295441  | H | 0 | 2.191035  | -3.629383 | 1.358728  |
| H  | 0 | -1.630052 | -0.559698 | -3.061410 | H | 0 | 1.158920  | -1.239482 | -3.787605 |
| H  | 0 | -0.782781 | 0.271972  | -4.348819 | H | 0 | -0.238387 | -0.559675 | -2.938834 |
| H  | 0 | -1.295847 | 3.083190  | -1.247934 | H | 0 | 1.334952  | 0.246804  | -2.840514 |
| H  | 0 | 0.414575  | -2.177821 | -2.914986 | H | 0 | 4.185087  | -2.827330 | -0.314734 |
| H  | 0 | 1.168516  | -1.222747 | -4.201606 | H | 0 | 2.883987  | -3.882370 | -0.829459 |
| H  | 0 | 2.024547  | -1.481691 | -2.673428 | H | 0 | 4.382961  | -0.562854 | 1.871095  |
| H  | 0 | -2.622687 | 1.646322  | -3.139699 | H | 0 | 3.515394  | -0.136454 | 0.396073  |
| H  | 0 | -1.072510 | 2.404985  | -3.444453 | H | 0 | 3.043714  | 0.589580  | 1.935643  |
| H  | 0 | -2.967318 | -0.522181 | 0.500428  | H | 0 | 1.612519  | -2.587126 | 3.442146  |
| H  | 0 | -3.967307 | 0.472870  | -0.565169 | H | 0 | 3.281519  | -2.041636 | 3.674948  |
| H  | 0 | -2.678973 | -0.524055 | -1.242000 | H | 0 | 1.948305  | -0.881937 | 3.787605  |
| H  | 0 | -1.710597 | 3.002358  | 1.109469  |   |   |           |           |           |
| H  | 0 | -3.407568 | 2.571184  | 0.844464  |   |   |           |           |           |
| H  | 0 | -2.401125 | 1.584422  | 1.916541  |   |   |           |           |           |

Energy + ZPE = -3259.576642  
Free energy = -3259.625723  
Free energy in DCM = -3259.962560  
Free energy in heptane = -3259.965002  
Number of imaginary frequencies = 1 (-392.48)

Energy + ZPE = -3259.577057  
Free energy = -3259.625938  
Free energy in DCM = -3259.962217  
Free energy in heptane = -3259.965040  
Number of imaginary frequencies = 1 (-398.24)

#### TS 17b+cpSiX

|    |   |           |           |           |
|----|---|-----------|-----------|-----------|
| C  | 0 | -1.271218 | 0.994968  | 2.357763  |
| C  | 0 | -1.258741 | 2.382808  | 2.321853  |
| C  | 0 | -2.691345 | 0.536876  | 2.212799  |
| C  | 0 | -2.512097 | 2.842704  | 1.876818  |
| C  | 0 | -3.310524 | 1.737028  | 1.521664  |
| H  | 0 | -0.458872 | 0.362650  | 2.696624  |
| H  | 0 | -0.398481 | 3.010453  | 2.529719  |
| H  | 0 | -2.827218 | -0.428931 | 1.725816  |
| H  | 0 | -3.135349 | 0.469333  | 3.221167  |
| H  | 0 | -2.769707 | 3.882370  | 1.701379  |
| H  | 0 | -4.382961 | 1.817099  | 1.366485  |
| Br | 0 | -2.002865 | -2.008207 | -0.284336 |
| B  | 0 | -0.744340 | -0.475003 | -0.270752 |

#### Product 17b+cpReN

|    |   |           |           |           |
|----|---|-----------|-----------|-----------|
| C  | 0 | -1.550612 | -0.473474 | 2.319234  |
| C  | 0 | -1.508283 | 0.902391  | 2.965217  |
| C  | 0 | -3.023095 | -0.859427 | 2.594997  |
| C  | 0 | -2.715934 | 1.460698  | 2.801910  |
| C  | 0 | -3.580694 | 0.469937  | 2.037994  |
| C  | 0 | -3.018019 | 0.432628  | 0.571757  |
| C  | 0 | -1.630693 | -0.268030 | 0.728514  |
| B  | 0 | -0.321933 | 0.384053  | 0.163457  |
| Br | 0 | -0.257205 | 2.306786  | -0.135214 |
| C  | 0 | 0.945724  | -0.467931 | -0.229719 |
| C  | 0 | 2.341758  | 0.157768  | 0.012987  |
| C  | 0 | 0.723429  | -0.808896 | -1.725453 |
| C  | 0 | 3.435197  | -0.777914 | -0.525484 |
| C  | 0 | 1.925280  | -1.102787 | -2.611755 |
| C  | 0 | 2.570495  | 0.471352  | 1.497183  |
| C  | 0 | 0.920217  | -2.200571 | -2.311311 |

|   |   |           |           |           |   |   |           |           |           |
|---|---|-----------|-----------|-----------|---|---|-----------|-----------|-----------|
| C | 0 | 3.340517  | -1.008420 | -2.047500 | H | 0 | 2.826612  | -0.520637 | 4.443851  |
| C | 0 | 1.284937  | -3.389067 | -1.438613 | H | 0 | 3.025050  | 2.105085  | 4.068258  |
| C | 0 | -0.014493 | -2.585912 | -3.449982 | H | 0 | 0.452784  | -1.356457 | 3.455608  |
| H | 0 | -0.779057 | -1.182341 | 2.628830  | H | 0 | 0.217412  | 0.013756  | 4.588264  |
| H | 0 | -0.617559 | 1.370791  | 3.371584  | H | 0 | 2.694266  | -1.578726 | 2.169278  |
| H | 0 | -3.353619 | -1.745636 | 2.039730  | H | 0 | 3.540318  | -0.054098 | 1.867953  |
| H | 0 | -3.228032 | -0.991911 | 3.662265  | H | 0 | 0.913795  | 2.901485  | 2.660716  |
| H | 0 | -3.005432 | 2.478648  | 3.043240  | H | 0 | -0.606833 | 0.782345  | 2.182960  |
| H | 0 | -4.660918 | 0.624200  | 2.098487  | H | 0 | 1.684231  | 0.813766  | 0.679152  |
| H | 0 | -2.937760 | 1.435675  | 0.144785  | H | 0 | -0.425876 | 0.481656  | -0.723451 |
| H | 0 | -3.676440 | -0.155755 | -0.078054 | H | 0 | -1.360759 | -2.383193 | -1.189962 |
| H | 0 | -1.683476 | -1.283445 | 0.308213  | H | 0 | 1.695414  | -1.389155 | -1.670494 |
| H | 0 | 0.900146  | -1.402308 | 0.352510  | H | 0 | -2.281869 | 0.258826  | -2.419409 |
| H | 0 | 2.386069  | 1.103611  | -0.545409 | H | 0 | -3.081433 | -1.279214 | -2.664863 |
| H | 0 | -0.058647 | -0.227051 | -2.215289 | H | 0 | 0.912813  | -1.783568 | -3.931829 |
| H | 0 | 3.382808  | -1.730258 | 0.020476  | H | 0 | -2.786889 | -0.008207 | 0.138259  |
| H | 0 | 4.424630  | -0.359955 | -0.296949 | H | 0 | -3.540318 | -1.563647 | -0.243779 |
| H | 0 | 1.854059  | -0.708767 | -3.625149 | H | 0 | -2.232659 | -1.491155 | 0.944896  |
| H | 0 | 2.485775  | -0.434992 | 2.111864  | H | 0 | -1.436832 | -0.560825 | -4.536370 |
| H | 0 | 3.569914  | 0.890864  | 1.663818  | H | 0 | -1.359418 | -2.207471 | -3.941921 |
| H | 0 | 1.840529  | 1.201706  | 1.864451  | H | 0 | -0.647831 | 1.532239  | -2.710630 |
| H | 0 | 3.932473  | -1.889204 | -2.332695 | H | 0 | 0.923548  | 2.288273  | -2.425201 |
| H | 0 | 3.818998  | -0.153542 | -2.543469 | H | 0 | 0.373009  | 1.980299  | -4.076928 |
| H | 0 | 0.384527  | -3.833526 | -0.993433 | H | 0 | 3.003981  | -0.678002 | -3.541888 |
| H | 0 | 1.768132  | -4.168316 | -2.041964 | H | 0 | 2.544272  | 0.674828  | -4.588264 |
| H | 0 | 1.966697  | -3.139608 | -0.623503 | H | 0 | 3.112886  | 0.983924  | -2.938651 |
| H | 0 | -0.275018 | -1.720480 | -4.069717 |   |   |           |           |           |
| H | 0 | 0.448488  | -3.336583 | -4.104099 |   |   |           |           |           |
| H | 0 | -0.949909 | -3.013693 | -3.065148 |   |   |           |           |           |

Energy + ZPE = -3259.617788

Free energy = -3259.666090

Free energy in DCM = -3260.006708

Free energy in heptane = -3260.010376

Number of imaginary frequencies = 0

Energy + ZPE = -3259.619242

Free energy = -3259.667519

Free energy in DCM = -3260.007876

Free energy in heptane = -3260.011829

Number of imaginary frequencies = 0

**Product 17b+cpReX**

|    |   |           |           |           |
|----|---|-----------|-----------|-----------|
| C  | 0 | 2.230129  | -0.036534 | 3.666602  |
| C  | 0 | 2.230129  | 1.484014  | 3.666602  |
| C  | 0 | 0.708927  | -0.313329 | 3.666602  |
| C  | 0 | 2.595465  | -0.489428 | 2.208128  |
| C  | 0 | 1.164443  | 1.888286  | 2.960022  |
| C  | 0 | 0.434244  | 0.643195  | 2.485131  |
| C  | 0 | 1.385074  | 0.000392  | 1.352597  |
| B  | 0 | 0.559076  | -1.020183 | 0.493604  |
| Br | 0 | 0.501446  | -2.901485 | 1.013675  |
| C  | 0 | -0.214132 | -0.595908 | -0.812135 |
| C  | 0 | -1.557457 | -1.303688 | -1.122586 |
| C  | 0 | 0.818316  | -0.803509 | -1.949780 |
| C  | 0 | -2.100105 | -0.823611 | -2.477352 |
| C  | 0 | 0.326729  | -1.058793 | -3.367461 |
| C  | 0 | -2.585876 | -1.078415 | -0.006807 |
| C  | 0 | 1.080733  | 0.219622  | -3.046025 |
| C  | 0 | -1.168012 | -1.164101 | -3.658168 |
| C  | 0 | 0.385960  | 1.570132  | -3.058962 |
| C  | 0 | 2.513213  | 0.301819  | -3.555978 |

**Product 17b+cpSiN**

|    |   |           |           |           |
|----|---|-----------|-----------|-----------|
| C  | 0 | 2.295129  | -1.508653 | 3.613957  |
| C  | 0 | 2.295129  | 0.012059  | 3.613957  |
| C  | 0 | 0.773414  | -1.778351 | 3.613957  |
| C  | 0 | 2.671782  | -1.948952 | 2.154205  |
| C  | 0 | 1.233923  | 0.416820  | 2.902174  |
| C  | 0 | 0.502655  | -0.827554 | 2.424504  |
| C  | 0 | 1.421173  | -1.538755 | 1.312736  |
| B  | 0 | 1.559753  | -0.652809 | 0.028550  |
| Br | 0 | 3.126265  | 0.486825  | -0.186272 |
| C  | 0 | 0.464204  | -0.563873 | -1.106082 |
| C  | 0 | 1.018764  | -0.948868 | -2.511379 |
| C  | 0 | -0.167753 | 0.844711  | -1.123179 |
| C  | 0 | -0.099096 | -0.844748 | -3.559005 |
| C  | 0 | -0.750537 | 1.393724  | -2.417864 |
| C  | 0 | 1.645527  | -2.349663 | -2.513450 |
| C  | 0 | -1.666001 | 1.088687  | -1.246978 |
| C  | 0 | -0.658199 | 0.585209  | -3.709488 |
| C  | 0 | -2.661018 | -0.057718 | -1.302165 |
| C  | 0 | -2.212615 | 2.291059  | -0.489160 |
| H  | 0 | 2.888856  | -1.992068 | 4.393775  |
| H  | 0 | 3.092750  | 0.631892  | 4.011297  |
| H  | 0 | 0.508292  | -2.822356 | 3.407414  |

|     |           |           |           |
|-----|-----------|-----------|-----------|
| H 0 | 0.283317  | -1.446321 | 4.534990  |
| H 0 | 3.588278  | -1.463012 | 1.810250  |
| H 0 | 2.829312  | -3.032846 | 2.107782  |
| H 0 | 0.990173  | 1.432042  | 2.605897  |
| H 0 | -0.535490 | -0.695082 | 2.111525  |
| H 0 | 0.866892  | -2.441611 | 1.016404  |
| H 0 | -0.312491 | -1.305622 | -0.862547 |
| H 0 | 1.804226  | -0.222086 | -2.763248 |
| H 0 | 0.359971  | 1.582327  | -0.520818 |
| H 0 | -0.895766 | -1.553867 | -3.293811 |
| H 0 | 0.280377  | -1.176110 | -4.534990 |
| H 0 | -0.583096 | 2.458075  | -2.580527 |
| H 0 | 0.916169  | -3.111824 | -2.208352 |
| H 0 | 2.007288  | -2.619480 | -3.512841 |
| H 0 | 2.500674  | -2.410412 | -1.828584 |
| H 0 | -1.629221 | 0.556406  | -4.222954 |
| H 0 | 0.017065  | 1.136195  | -4.377312 |
| H 0 | -2.927247 | -0.389568 | -0.289363 |
| H 0 | -3.588278 | 0.266665  | -1.791862 |
| H 0 | -2.292694 | -0.928949 | -1.847302 |
| H 0 | -1.487106 | 3.111824  | -0.456790 |
| H 0 | -3.127302 | 2.674165  | -0.961071 |
| H 0 | -2.461464 | 2.025183  | 0.547094  |

Energy + ZPE = -3259.617584

Free energy = -3259.666349

Free energy in DCM = -3260.005935

Free energy in heptane = -3260.009746

Number of imaginary frequencies = 0

|     |           |           |           |
|-----|-----------|-----------|-----------|
| H 0 | -4.129077 | 2.146047  | -0.846477 |
| H 0 | -2.698227 | 0.509786  | -2.104862 |
| H 0 | -1.946704 | 2.072405  | -2.456490 |
| H 0 | 1.619730  | -0.181692 | -0.417693 |
| H 0 | 1.036474  | -2.750034 | -1.946358 |
| H 0 | 0.029724  | -2.226248 | 1.065548  |
| H 0 | 3.672747  | -1.397329 | -1.198226 |
| H 0 | 3.540434  | -2.781999 | -2.262841 |
| H 0 | 1.745088  | -3.916654 | 1.378907  |
| H 0 | 2.133287  | -1.555410 | -3.877725 |
| H 0 | 0.630060  | -0.769355 | -3.381682 |
| H 0 | 2.191744  | -0.071197 | -2.914095 |
| H 0 | 4.129077  | -3.310365 | 0.210780  |
| H 0 | 2.902884  | -4.274892 | -0.586995 |
| H 0 | 4.001613  | -1.016091 | 2.365560  |
| H 0 | 3.534284  | -0.562869 | 0.726847  |
| H 0 | 2.780244  | 0.236378  | 2.110499  |
| H 0 | 0.791639  | -2.784224 | 3.267288  |
| H 0 | 2.398385  | -2.356865 | 3.877725  |
| H 0 | 1.167631  | -1.100129 | 3.666463  |

Energy + ZPE = -3259.619004

Free energy = -3259.669780

Free energy in DCM = -3260.007197

Free energy in heptane = -3260.011131

Number of imaginary frequencies = 0

## Diels-Alder reaction with Vinylborane (18a)

### Product 17b+cpSiX

|      |           |           |           |
|------|-----------|-----------|-----------|
| C 0  | -1.287300 | 1.336266  | 0.632412  |
| C 0  | -1.287300 | 2.855437  | 0.632412  |
| C 0  | -2.806090 | 1.053283  | 0.632412  |
| C 0  | -0.907418 | 0.913114  | -0.879532 |
| C 0  | -2.360375 | 3.258076  | -0.063946 |
| C 0  | -3.086457 | 2.012990  | -0.547465 |
| B 0  | -0.459616 | -0.588499 | -0.899122 |
| C 0  | -2.183516 | 1.364736  | -1.655808 |
| Br 0 | -1.776957 | -1.989377 | -1.252994 |
| C 0  | 1.004734  | -1.081634 | -0.573963 |
| C 0  | 1.646783  | -1.852663 | -1.770176 |
| C 0  | 1.016909  | -1.937135 | 0.709839  |
| C 0  | 3.069960  | -2.294232 | -1.398537 |
| C 0  | 2.088668  | -3.000999 | 0.898629  |
| C 0  | 1.648779  | -1.014966 | -3.055862 |
| C 0  | 2.063179  | -1.786048 | 1.806418  |
| C 0  | 3.111649  | -3.268041 | -0.202059 |
| C 0  | 3.150382  | -0.727453 | 1.735545  |
| C 0  | 1.577343  | -2.021204 | 3.230254  |
| H 0  | -0.684757 | 0.853917  | 1.406016  |
| H 0  | -0.484715 | 3.471249  | 1.026802  |
| H 0  | -3.057670 | 0.009561  | 0.418708  |
| H 0  | -3.287187 | 1.371945  | 1.562372  |
| H 0  | -0.035750 | 1.511602  | -1.173080 |
| H 0  | -2.614634 | 4.274892  | -0.347385 |

### TS 18a+cpReN

|      |           |           |           |
|------|-----------|-----------|-----------|
| C 0  | 0.020401  | 2.399638  | 1.636553  |
| C 0  | 0.183805  | 3.792885  | 1.092211  |
| C 0  | 1.661288  | 4.025003  | 1.357883  |
| C 0  | 1.986680  | 3.200418  | 2.453660  |
| C 0  | 1.012759  | 2.194500  | 2.584124  |
| H 0  | -0.878873 | 1.805633  | 1.523019  |
| H 0  | -0.386524 | 4.480117  | 1.740751  |
| H 0  | -0.152380 | 3.951737  | 0.066892  |
| H 0  | 2.119452  | 4.999484  | 1.212236  |
| H 0  | 2.912472  | 3.247013  | 3.016925  |
| H 0  | 1.079870  | 1.344024  | 3.252715  |
| C 0  | 0.273401  | -2.774486 | -1.817001 |
| C 0  | 1.320142  | -1.737888 | -1.358590 |
| C 0  | 0.667678  | -0.701003 | -0.400135 |
| C 0  | 0.090950  | -1.399544 | 0.868031  |
| C 0  | -0.535973 | -2.778573 | 0.674419  |
| C 0  | -0.423761 | -3.490576 | -0.663404 |
| C 0  | 1.976688  | -1.078866 | -2.579877 |
| C 0  | -1.788349 | -3.080476 | -0.125735 |
| C 0  | -2.601748 | -1.977851 | -0.780764 |
| C 0  | -2.664354 | -4.207567 | 0.404045  |
| Cl 0 | 3.140036  | 0.058252  | 0.948170  |
| B 0  | 1.655879  | 0.485111  | -0.019991 |
| C 0  | 1.488080  | 1.923562  | -0.473755 |
| C 0  | 2.372616  | 2.991010  | -0.245189 |

|   |   |           |           |           |
|---|---|-----------|-----------|-----------|
| H | 0 | -0.454343 | -2.269579 | -2.468829 |
| H | 0 | 0.768202  | -3.522420 | -2.449624 |
| H | 0 | 2.100449  | -2.268898 | -0.793642 |
| H | 0 | -0.161695 | -0.240422 | -0.960002 |
| H | 0 | -0.624542 | -0.724065 | 1.359525  |
| H | 0 | 0.915106  | -1.531297 | 1.579747  |
| H | 0 | -0.412408 | -3.413012 | 1.552090  |
| H | 0 | -0.219398 | -4.559192 | -0.614661 |
| H | 0 | 1.243359  | -0.497828 | -3.154991 |
| H | 0 | 2.787444  | -0.399152 | -2.294816 |
| H | 0 | 2.398571  | -1.835768 | -3.252715 |
| H | 0 | -3.193489 | -2.377072 | -1.615614 |
| H | 0 | -3.307791 | -1.543081 | -0.060719 |
| H | 0 | -1.990068 | -1.162693 | -1.172288 |
| H | 0 | -2.065906 | -4.999484 | 0.868965  |
| H | 0 | -3.371570 | -3.839023 | 1.159507  |
| H | 0 | -3.251463 | -4.665340 | -0.403583 |
| H | 0 | 0.627294  | 2.137086  | -1.109318 |
| H | 0 | 2.332399  | 3.852863  | -0.910112 |
| H | 0 | 3.371570  | 2.767195  | 0.117012  |

Energy + ZPE = -1148.065188  
Free energy = -1148.113559  
Free energy in DCM = -1148.452918  
Free energy in heptane = -1148.454991  
Number of imaginary frequencies = 1 (-402.78)

**TS 18a+cpReX**

|    |   |           |           |           |
|----|---|-----------|-----------|-----------|
| C  | 0 | 0.591771  | 4.443646  | 0.236330  |
| C  | 0 | -0.740892 | 3.720412  | 0.275010  |
| C  | 0 | -0.561862 | 2.737969  | -0.844213 |
| C  | 0 | 0.402534  | 3.240101  | -1.707955 |
| C  | 0 | 1.065193  | 4.313222  | -1.084233 |
| H  | 0 | 0.781342  | 5.326150  | 0.841122  |
| H  | 0 | -1.520300 | 4.442264  | -0.024903 |
| H  | 0 | -1.032615 | 3.296961  | 1.235957  |
| H  | 0 | -1.262844 | 1.943884  | -1.072471 |
| H  | 0 | 0.656838  | 2.824743  | -2.677508 |
| H  | 0 | 1.902408  | 4.860463  | -1.505585 |
| C  | 0 | 0.641211  | -3.220825 | 1.017971  |
| C  | 0 | 0.691381  | -1.833580 | 1.690792  |
| C  | 0 | 0.201073  | -0.736517 | 0.704111  |
| C  | 0 | -1.266679 | -1.004859 | 0.248877  |
| C  | 0 | -1.677557 | -2.463814 | 0.061546  |
| C  | 0 | -0.735450 | -3.584550 | 0.470518  |
| C  | 0 | 2.105568  | -1.556701 | 2.220294  |
| C  | 0 | -1.130582 | -3.410353 | -0.989584 |
| C  | 0 | -0.130986 | -2.946703 | -2.034691 |
| C  | 0 | -2.112309 | -4.434030 | -1.543209 |
| Cl | 0 | -0.599027 | 1.142723  | 2.779650  |
| B  | 0 | 0.366932  | 0.733696  | 1.284475  |
| C  | 0 | 1.316421  | 1.772044  | 0.715818  |
| C  | 0 | 1.658787  | 3.021382  | 1.257600  |
| H  | 0 | 1.405002  | -3.253756 | 0.227524  |
| H  | 0 | 0.941749  | -3.980472 | 1.750772  |
| H  | 0 | 0.000706  | -1.845337 | 2.546811  |

|   |   |           |           |           |
|---|---|-----------|-----------|-----------|
| H | 0 | 0.858653  | -0.794068 | -0.177470 |
| H | 0 | -1.467364 | -0.435647 | -0.670571 |
| H | 0 | -1.936573 | -0.590349 | 1.012026  |
| H | 0 | -2.728569 | -2.628917 | 0.298348  |
| H | 0 | -1.201786 | -4.433934 | 0.967600  |
| H | 0 | 2.827380  | -1.485145 | 1.395809  |
| H | 0 | 2.156668  | -0.620756 | 2.788071  |
| H | 0 | 2.439651  | -2.364905 | 2.882600  |
| H | 0 | 0.439242  | -3.798320 | -2.429790 |
| H | 0 | -0.651831 | -2.482360 | -2.882600 |
| H | 0 | 0.588459  | -2.218167 | -1.655382 |
| H | 0 | -2.827380 | -4.760477 | -0.779472 |
| H | 0 | -2.687877 | -4.018930 | -2.381656 |
| H | 0 | -1.587647 | -5.326150 | -1.911017 |
| H | 0 | 1.903340  | 1.452042  | -0.145691 |
| H | 0 | 2.643577  | 3.434589  | 1.055146  |
| H | 0 | 1.270890  | 3.278334  | 2.241386  |

Energy + ZPE = -1148.064818  
Free energy = -1148.113137  
Free energy in DCM = -1148.451764  
Free energy in heptane = -1148.454185  
Number of imaginary frequencies = 1 (-400.99)

**TS 18a+cpSiN**

|    |   |           |           |           |
|----|---|-----------|-----------|-----------|
| C  | 0 | 2.343493  | 2.570336  | 0.330433  |
| C  | 0 | 3.314164  | 2.485928  | 1.477238  |
| C  | 0 | 4.427564  | 1.671839  | 0.841356  |
| C  | 0 | 4.341708  | 1.920903  | -0.542303 |
| C  | 0 | 3.062885  | 2.421057  | -0.845822 |
| H  | 0 | 1.340496  | 2.972033  | 0.411393  |
| H  | 0 | 2.915848  | 2.105108  | 2.418456  |
| H  | 0 | 3.705646  | 3.500181  | 1.667244  |
| H  | 0 | 5.378357  | 1.515790  | 1.343643  |
| H  | 0 | 5.090335  | 1.639347  | -1.275077 |
| H  | 0 | 2.675616  | 2.573683  | -1.846398 |
| C  | 0 | -2.606954 | 0.074323  | -1.208193 |
| C  | 0 | -1.088138 | 0.186946  | -1.459918 |
| C  | 0 | -0.297005 | -0.316344 | -0.229702 |
| C  | 0 | -0.636917 | -1.812796 | 0.093878  |
| C  | 0 | -2.074485 | -2.263591 | -0.156625 |
| C  | 0 | -3.064572 | -1.332586 | -0.835795 |
| C  | 0 | -0.730851 | 1.631157  | -1.834293 |
| C  | 0 | -3.297654 | -1.783148 | 0.600078  |
| C  | 0 | -3.181603 | -0.815608 | 1.764866  |
| C  | 0 | -4.401209 | -2.811072 | 0.808159  |
| Cl | 0 | 2.105261  | -0.735096 | -1.841906 |
| B  | 0 | 1.288766  | -0.243343 | -0.290926 |
| C  | 0 | 2.155273  | 0.036839  | 0.924749  |
| C  | 0 | 3.542533  | -0.155017 | 1.038300  |
| H  | 0 | -2.886142 | 0.800215  | -0.430493 |
| H  | 0 | -3.141278 | 0.391529  | -2.112686 |
| H  | 0 | -0.835515 | -0.459233 | -2.313122 |
| H  | 0 | -0.610360 | 0.299620  | 0.628463  |
| H  | 0 | -0.337799 | -2.034118 | 1.127478  |
| H  | 0 | -0.003716 | -2.446473 | -0.541079 |

|   |   |           |           |           |
|---|---|-----------|-----------|-----------|
| H | 0 | -2.128787 | -3.307733 | -0.464292 |
| H | 0 | -3.721861 | -1.796307 | -1.569916 |
| H | 0 | -0.940419 | 2.316167  | -1.000919 |
| H | 0 | 0.326902  | 1.730972  | -2.097837 |
| H | 0 | -1.321345 | 1.972513  | -2.693634 |
| H | 0 | -4.126029 | -0.275387 | 1.915969  |
| H | 0 | -2.965456 | -1.359853 | 2.693634  |
| H | 0 | -2.394335 | -0.070794 | 1.632730  |
| H | 0 | -4.475310 | -3.500181 | -0.040936 |
| H | 0 | -4.218466 | -3.412324 | 1.709027  |
| H | 0 | -5.378357 | -2.323726 | 0.927272  |
| H | 0 | 1.628190  | 0.296195  | 1.844597  |
| H | 0 | 3.965566  | -0.325017 | 2.027499  |
| H | 0 | 4.056247  | -0.693333 | 0.247208  |

Energy + ZPE = -1148.064013

Free energy = -1148.111679

Free energy in DCM = -1148.452749

Free energy in heptane = -1148.454730

Number of imaginary frequencies = 1 (-403.87)

**TS 18a+cpSiX**

|    |   |           |           |           |
|----|---|-----------|-----------|-----------|
| C  | 0 | -1.474000 | 4.534000  | -1.308500 |
| C  | 0 | -0.039000 | 4.044000  | -1.337500 |
| C  | 0 | -0.202000 | 2.735000  | -2.052500 |
| C  | 0 | -1.367000 | 2.798000  | -2.804500 |
| C  | 0 | -2.115000 | 3.920000  | -2.401500 |
| H  | 0 | -1.730000 | 5.533000  | -0.964500 |
| H  | 0 | 0.475000  | 4.000000  | -0.376500 |
| H  | 0 | 0.532000  | 4.724000  | -1.993500 |
| H  | 0 | 0.590000  | 2.007000  | -2.173500 |
| H  | 0 | -1.688000 | 2.060000  | -3.531500 |
| H  | 0 | -3.097000 | 4.186000  | -2.780500 |
| C  | 0 | 1.416000  | -2.132000 | 0.622500  |
| C  | 0 | 1.354000  | -0.592000 | 0.690500  |
| C  | 0 | -0.117000 | -0.117000 | 0.749500  |
| C  | 0 | -0.852000 | -0.694000 | 2.009500  |
| C  | 0 | -0.459000 | -2.102000 | 2.450500  |
| C  | 0 | 0.697000  | -2.823000 | 1.776500  |
| C  | 0 | 2.117000  | 0.013000  | -0.495500 |
| C  | 0 | -0.717000 | -3.377000 | 1.671500  |
| C  | 0 | -1.481000 | -3.363000 | 0.358500  |
| C  | 0 | -1.013000 | -4.619000 | 2.500500  |
| Cl | 0 | 0.694000  | 2.470000  | 1.832500  |
| B  | 0 | -0.381000 | 1.449000  | 0.768500  |
| C  | 0 | -1.574000 | 2.095000  | 0.085500  |
| C  | 0 | -2.079000 | 3.390000  | 0.281500  |
| H  | 0 | 1.012000  | -2.456000 | -0.348500 |
| H  | 0 | 2.467000  | -2.446000 | 0.622500  |
| H  | 0 | 1.853000  | -0.272000 | 1.616500  |
| H  | 0 | -0.618000 | -0.507000 | -0.150500 |
| H  | 0 | -1.938000 | -0.626000 | 1.853500  |
| H  | 0 | -0.632000 | -0.034000 | 2.859500  |
| H  | 0 | -0.520000 | -2.226000 | 3.531500  |
| H  | 0 | 1.355000  | -3.382000 | 2.440500  |
| H  | 0 | 1.632000  | -0.248000 | -1.446500 |

|   |   |           |           |           |
|---|---|-----------|-----------|-----------|
| H | 0 | 2.175000  | 1.104000  | -0.427500 |
| H | 0 | 3.145000  | -0.369000 | -0.538500 |
| H | 0 | -1.224000 | -4.241000 | -0.248500 |
| H | 0 | -2.562000 | -3.401000 | 0.546500  |
| H | 0 | -1.286000 | -2.475000 | -0.246500 |
| H | 0 | -0.455000 | -4.616000 | 3.443500  |
| H | 0 | -2.081000 | -4.688000 | 2.744500  |
| H | 0 | -0.738000 | -5.533000 | 1.954500  |
| H | 0 | -2.203000 | 1.423000  | -0.499500 |
| H | 0 | -3.145000 | 3.567000  | 0.165500  |
| H | 0 | -1.616000 | 4.011000  | 1.046500  |

Energy + ZPE = -1148.064248

Free energy = -1148.112172

Free energy in DCM = -1148.451500

Free energy in heptane = -1148.454073

Number of imaginary frequencies = 1 (-403.90)

**Product 18a+cpReN**

|    |   |           |           |           |
|----|---|-----------|-----------|-----------|
| C  | 0 | -0.407230 | 2.581379  | 0.738173  |
| C  | 0 | -0.299651 | 4.110537  | 0.536639  |
| C  | 0 | 1.169348  | 4.171077  | 1.013804  |
| C  | 0 | 1.057029  | 3.404493  | 2.323495  |
| C  | 0 | 0.121002  | 2.458798  | 2.160048  |
| C  | 0 | -0.497511 | -2.508789 | -2.014857 |
| C  | 0 | 0.601298  | -1.523555 | -1.569016 |
| C  | 0 | 0.048327  | -0.561193 | -0.480860 |
| C  | 0 | -0.435892 | -1.345758 | 0.780602  |
| C  | 0 | -1.089750 | -2.703674 | 0.530566  |
| C  | 0 | -1.099848 | -3.309035 | -0.864147 |
| C  | 0 | 1.159996  | -0.767165 | -2.783091 |
| C  | 0 | -2.408484 | -2.937783 | -0.180243 |
| C  | 0 | -3.264762 | -1.784134 | -0.672889 |
| C  | 0 | -3.246728 | -4.100272 | 0.334111  |
| Cl | 0 | 2.650406  | 0.044018  | 0.628712  |
| B  | 0 | 1.080999  | 0.568581  | -0.070197 |
| C  | 0 | 0.763427  | 2.097099  | -0.242498 |
| C  | 0 | 1.849592  | 3.194037  | -0.009056 |
| H  | 0 | -1.373966 | 2.115130  | 0.534468  |
| H  | 0 | -0.981401 | 4.668528  | 1.186723  |
| H  | 0 | -0.439146 | 4.424881  | -0.504826 |
| H  | 0 | 1.637259  | 5.157045  | 1.070311  |
| H  | 0 | 1.714743  | 3.536097  | 3.177015  |
| H  | 0 | -0.141303 | 1.665527  | 2.853614  |
| H  | 0 | -1.271523 | -1.947909 | -2.558174 |
| H  | 0 | -0.069943 | -3.206793 | -2.745627 |
| H  | 0 | 1.419405  | -2.103827 | -1.118522 |
| H  | 0 | -0.817590 | -0.049324 | -0.928555 |
| H  | 0 | -1.105314 | -0.703594 | 1.370484  |
| H  | 0 | 0.436934  | -1.535804 | 1.416696  |
| H  | 0 | -0.895697 | -3.405292 | 1.341478  |
| H  | 0 | -0.900718 | -4.378333 | -0.914899 |
| H  | 0 | 0.391477  | -0.127617 | -3.237451 |
| H  | 0 | 2.011739  | -0.129758 | -2.515848 |
| H  | 0 | 1.505413  | -1.465025 | -3.555399 |
| H  | 0 | -3.932370 | -2.115430 | -1.479569 |

|   |   |           |           |           |
|---|---|-----------|-----------|-----------|
| H | 0 | -3.898896 | -1.404690 | 0.139074  |
| H | 0 | -2.684987 | -0.940779 | -1.054066 |
| H | 0 | -2.617681 | -4.926417 | 0.684578  |
| H | 0 | -3.884201 | -3.788562 | 1.172264  |
| H | 0 | -3.903115 | -4.492609 | -0.454113 |
| H | 0 | 0.352350  | 2.198640  | -1.259878 |
| H | 0 | 2.079326  | 3.718503  | -0.943923 |
| H | 0 | 2.786358  | 2.789844  | 0.382405  |

Energy + ZPE = -1148.107985  
Free energy = -1148.156062  
Free energy in DCM = -1148.498025  
Free energy in heptane = -1148.501377  
Number of imaginary frequencies = 0

**Product 18a+cpReX**

|    |   |           |           |           |
|----|---|-----------|-----------|-----------|
| C  | 0 | -2.921274 | -2.490627 | 2.238594  |
| C  | 0 | -2.726865 | -0.974261 | 2.470907  |
| C  | 0 | -1.197825 | -1.036001 | 2.257886  |
| C  | 0 | -0.836283 | -2.183482 | 3.186552  |
| C  | 0 | -1.862289 | -3.046853 | 3.177080  |
| C  | 0 | 2.203790  | 0.566377  | -2.319347 |
| C  | 0 | 0.788571  | -0.002069 | -2.091298 |
| C  | 0 | 0.355204  | 0.219440  | -0.612603 |
| C  | 0 | 0.320206  | 1.737939  | -0.257220 |
| C  | 0 | 1.409502  | 2.608189  | -0.880113 |
| C  | 0 | 2.339666  | 2.037762  | -1.938686 |
| C  | 0 | 0.739271  | -1.481436 | -2.500395 |
| C  | 0 | 2.896677  | 2.509663  | -0.601789 |
| C  | 0 | 3.458417  | 1.533677  | 0.417705  |
| C  | 0 | 3.665988  | 3.823627  | -0.625640 |
| Cl | 0 | -2.494036 | 0.115670  | -1.112933 |
| B  | 0 | -1.019680 | -0.493600 | -0.278825 |
| C  | 0 | -1.128294 | -1.656776 | 0.770780  |
| C  | 0 | -2.355055 | -2.620189 | 0.780239  |
| H  | 0 | -3.931971 | -2.888315 | 2.359131  |
| H  | 0 | -2.991192 | -0.662849 | 3.486274  |
| H  | 0 | -3.252901 | -0.348845 | 1.741535  |
| H  | 0 | -0.632958 | -0.110581 | 2.396108  |
| H  | 0 | 0.133523  | -2.312072 | 3.657547  |
| H  | 0 | -1.901929 | -4.024187 | 3.648310  |
| H  | 0 | 2.922935  | -0.055294 | -1.766854 |
| H  | 0 | 2.463611  | 0.449201  | -3.378980 |
| H  | 0 | 0.088269  | 0.555714  | -2.729982 |
| H  | 0 | 1.118627  | -0.270496 | 0.010656  |
| H  | 0 | 0.319823  | 1.854567  | 0.836192  |
| H  | 0 | -0.637562 | 2.144538  | -0.602868 |
| H  | 0 | 1.062973  | 3.624950  | -1.063802 |
| H  | 0 | 2.557702  | 2.695280  | -2.778789 |
| H  | 0 | 1.382572  | -2.091858 | -1.853000 |
| H  | 0 | -0.276343 | -1.892759 | -2.446071 |
| H  | 0 | 1.089337  | -1.613783 | -3.531213 |
| H  | 0 | 4.519005  | 1.333294  | 0.215082  |
| H  | 0 | 3.394613  | 1.957225  | 1.428545  |
| H  | 0 | 2.941875  | 0.571677  | 0.434035  |
| H  | 0 | 3.254389  | 4.518625  | -1.366373 |

|   |   |           |           |           |
|---|---|-----------|-----------|-----------|
| H | 0 | 3.630297  | 4.321380  | 0.352699  |
| H | 0 | 4.722617  | 3.658113  | -0.875061 |
| H | 0 | -0.190336 | -2.222740 | 0.705398  |
| H | 0 | -2.069163 | -3.649203 | 0.540856  |
| H | 0 | -3.117199 | -2.309844 | 0.058770  |

Energy + ZPE = -1148.107858  
Free energy = -1148.155638  
Free energy in DCM = -1148.497879  
Free energy in heptane = -1148.501516  
Number of imaginary frequencies = 0

**Product 18a+cpSiN**

|    |   |           |           |           |
|----|---|-----------|-----------|-----------|
| C  | 0 | -2.263284 | 1.797704  | -2.119777 |
| C  | 0 | -2.090502 | 3.331898  | -2.208319 |
| C  | 0 | -0.548555 | 3.262779  | -2.116636 |
| C  | 0 | -0.260497 | 2.225333  | -3.193496 |
| C  | 0 | -1.279223 | 1.353386  | -3.195830 |
| C  | 0 | 0.630385  | -1.630686 | 2.760355  |
| C  | 0 | -0.560833 | -1.340611 | 1.824235  |
| C  | 0 | -0.110212 | -0.425181 | 0.656222  |
| C  | 0 | 1.020544  | -1.094527 | -0.196702 |
| C  | 0 | 2.037187  | -1.938044 | 0.569940  |
| C  | 0 | 1.834410  | -2.237690 | 2.046295  |
| C  | 0 | -1.721490 | -0.727909 | 2.620562  |
| C  | 0 | 3.035227  | -1.421346 | 1.587618  |
| C  | 0 | 3.160136  | 0.059054  | 1.903102  |
| C  | 0 | 4.380453  | -2.133980 | 1.622556  |
| Cl | 0 | -2.324237 | -1.264538 | -1.009477 |
| B  | 0 | -1.258262 | 0.022021  | -0.333772 |
| C  | 0 | -1.568646 | 1.510100  | -0.732708 |
| C  | 0 | -0.369605 | 2.528634  | -0.743066 |
| H  | 0 | -3.275951 | 1.399224  | -2.198821 |
| H  | 0 | -2.556040 | 3.873945  | -1.375589 |
| H  | 0 | -2.440570 | 3.746012  | -3.159067 |
| H  | 0 | 0.002102  | 4.204000  | -2.191784 |
| H  | 0 | 0.663678  | 2.161174  | -3.759923 |
| H  | 0 | -1.361946 | 0.434380  | -3.766561 |
| H  | 0 | 0.903543  | -0.699636 | 3.277535  |
| H  | 0 | 0.301063  | -2.320554 | 3.547353  |
| H  | 0 | -0.900475 | -2.294656 | 1.396765  |
| H  | 0 | 0.296318  | 0.490858  | 1.109693  |
| H  | 0 | 1.531074  | -0.325441 | -0.793168 |
| H  | 0 | 0.546101  | -1.768834 | -0.920664 |
| H  | 0 | 2.407405  | -2.770151 | -0.028395 |
| H  | 0 | 2.068854  | -3.254898 | 2.356108  |
| H  | 0 | -1.445192 | 0.255054  | 3.025095  |
| H  | 0 | -2.619253 | -0.599405 | 2.004537  |
| H  | 0 | -1.995965 | -1.366837 | 3.468584  |
| H  | 0 | 3.812841  | 0.552314  | 1.170965  |
| H  | 0 | 2.205740  | 0.589626  | 1.897844  |
| H  | 0 | 3.612094  | 0.206017  | 2.893209  |
| H  | 0 | 4.277391  | -3.200932 | 1.394526  |
| H  | 0 | 5.076697  | -1.702970 | 0.890732  |
| H  | 0 | 4.846180  | -2.048672 | 2.613468  |
| H  | 0 | -2.273991 | 1.827605  | 0.059789  |

|   |   |           |          |           |
|---|---|-----------|----------|-----------|
| H | 0 | -0.442054 | 3.239130 | 0.088341  |
| H | 0 | 0.610755  | 2.047206 | -0.676689 |

Energy + ZPE = -1148.107866  
 Free energy = -1148.155348  
 Free energy in DCM = -1148.498022  
 Free energy in heptane = -1148.501481  
 Number of imaginary frequencies = 0

Energy + ZPE = -1148.108038  
 Free energy = -1148.155677  
 Free energy in DCM = -1148.498353  
 Free energy in heptane = -1148.501954  
 Number of imaginary frequencies = 0

### Diels-Alder reaction with Vinylborane (18b)

#### Product 18a+cpSiX

|    |   |           |           |           |
|----|---|-----------|-----------|-----------|
| C  | 0 | -2.817803 | -2.291929 | -2.572510 |
| C  | 0 | -2.870616 | -0.748417 | -2.629770 |
| C  | 0 | -1.337690 | -0.591248 | -2.516867 |
| C  | 0 | -0.881311 | -1.557324 | -3.597616 |
| C  | 0 | -1.762793 | -2.567333 | -3.632221 |
| C  | 0 | 1.551372  | 2.525018  | 1.147864  |
| C  | 0 | 0.161964  | 1.941990  | 0.814382  |
| C  | 0 | 0.281216  | 0.436563  | 0.477670  |
| C  | 0 | 0.875916  | -0.381164 | 1.677660  |
| C  | 0 | 1.948586  | 0.319918  | 2.509076  |
| C  | 0 | 2.275528  | 1.784436  | 2.268282  |
| C  | 0 | -0.478878 | 2.738893  | -0.330280 |
| C  | 0 | 3.329098  | 0.712552  | 2.020694  |
| C  | 0 | 3.804845  | 0.367365  | 0.620351  |
| C  | 0 | 4.448517  | 0.626436  | 3.049278  |
| Cl | 0 | -2.537872 | 0.002808  | 1.005085  |
| B  | 0 | -1.042165 | -0.319147 | 0.057173  |
| C  | 0 | -1.059216 | -1.354757 | -1.124294 |
| C  | 0 | -2.126734 | -2.492019 | -1.176705 |
| H  | 0 | -3.763778 | -2.828322 | -2.680129 |
| H  | 0 | -3.426234 | -0.298355 | -1.800343 |
| H  | 0 | -3.255435 | -0.371325 | -3.582460 |
| H  | 0 | -0.930695 | 0.421174  | -2.574101 |
| H  | 0 | 0.057814  | -1.479229 | -4.136982 |
| H  | 0 | -1.691678 | -3.480882 | -4.214643 |
| H  | 0 | 2.153799  | 2.537586  | 0.227955  |
| H  | 0 | 1.433524  | 3.576423  | 1.438014  |
| H  | 0 | -0.475196 | 2.042736  | 1.704674  |
| H  | 0 | 0.977562  | 0.349032  | -0.370846 |
| H  | 0 | 1.246365  | -1.348208 | 1.309726  |
| H  | 0 | 0.057343  | -0.616214 | 2.370653  |
| H  | 0 | 1.918746  | 0.012512  | 3.554070  |
| H  | 0 | 2.439723  | 2.382292  | 3.163463  |
| H  | 0 | 0.109002  | 2.640495  | -1.252970 |
| H  | 0 | -1.500264 | 2.403534  | -0.542335 |
| H  | 0 | -0.528032 | 3.807069  | -0.086217 |
| H  | 0 | 4.628705  | 1.027649  | 0.318233  |
| H  | 0 | 4.184385  | -0.662344 | 0.588830  |
| H  | 0 | 3.024022  | 0.450270  | -0.138249 |
| H  | 0 | 4.090663  | 0.871007  | 4.055901  |
| H  | 0 | 4.877276  | -0.384001 | 3.085209  |
| H  | 0 | 5.261680  | 1.323414  | 2.806415  |
| H  | 0 | -0.045526 | -1.771846 | -1.186554 |
| H  | 0 | -1.673323 | -3.483627 | -1.081532 |
| H  | 0 | -2.867759 | -2.386717 | -0.378100 |

#### TS 18b+cpReN

|    |   |           |           |           |
|----|---|-----------|-----------|-----------|
| C  | 0 | 0.073801  | 2.458991  | 1.716705  |
| C  | 0 | 0.265975  | 3.850632  | 1.181244  |
| C  | 0 | 1.768399  | 4.013462  | 1.350703  |
| C  | 0 | 2.129087  | 3.147561  | 2.403818  |
| C  | 0 | 1.119873  | 2.183225  | 2.581533  |
| H  | 0 | -0.853974 | 1.903550  | 1.645674  |
| H  | 0 | -0.229830 | 4.554637  | 1.871563  |
| H  | 0 | -0.128418 | 4.038245  | 0.181632  |
| H  | 0 | 2.252650  | 4.976154  | 1.209781  |
| H  | 0 | 3.091896  | 3.137737  | 2.902770  |
| H  | 0 | 1.196493  | 1.313484  | 3.223116  |
| C  | 0 | 0.352485  | -2.808765 | -1.821363 |
| C  | 0 | 1.361842  | -1.733780 | -1.371375 |
| C  | 0 | 0.655286  | -0.671086 | -0.482194 |
| C  | 0 | 0.059614  | -1.330752 | 0.798841  |
| C  | 0 | -0.526708 | -2.732051 | 0.645744  |
| C  | 0 | -0.363023 | -3.493196 | -0.660009 |
| C  | 0 | 2.059770  | -1.111313 | -2.588459 |
| C  | 0 | -1.749996 | -3.093889 | -0.174630 |
| C  | 0 | -2.568853 | -2.034278 | -0.891152 |
| C  | 0 | -2.615177 | -4.219362 | 0.375604  |
| Br | 0 | 3.231601  | 0.103102  | 0.928233  |
| B  | 0 | 1.605389  | 0.543719  | -0.114285 |
| C  | 0 | 1.426175  | 1.984729  | -0.532201 |
| C  | 0 | 2.339045  | 3.033473  | -0.316276 |
| H  | 0 | -0.364966 | -2.346550 | -2.514876 |
| H  | 0 | 0.882341  | -3.570240 | -2.407709 |
| H  | 0 | 2.129306  | -2.220708 | -0.752050 |
| H  | 0 | -0.166384 | -0.251567 | -1.084475 |
| H  | 0 | -0.685110 | -0.654174 | 1.242775  |
| H  | 0 | 0.871730  | -1.408728 | 1.532248  |
| H  | 0 | -0.411119 | -3.328071 | 1.551068  |
| H  | 0 | -0.137384 | -4.554122 | -0.562283 |
| H  | 0 | 1.349767  | -0.545256 | -3.206090 |
| H  | 0 | 2.860916  | -0.427033 | -2.287577 |
| H  | 0 | 2.505887  | -1.887050 | -3.223116 |
| H  | 0 | -3.143835 | -2.480205 | -1.713940 |
| H  | 0 | -3.289854 | -1.575946 | -0.201221 |
| H  | 0 | -1.962217 | -1.230263 | -1.312346 |
| H  | 0 | -2.012848 | -4.976154 | 0.891308  |
| H  | 0 | -3.353924 | -3.837549 | 1.093360  |
| H  | 0 | -3.165830 | -4.724762 | -0.429280 |
| H  | 0 | 0.535856  | 2.225702  | -1.115630 |
| H  | 0 | 2.276026  | 3.915458  | -0.952778 |
| H  | 0 | 3.353924  | 2.771461  | -0.031011 |



Energy + ZPE = -3259.576541  
 Free energy = -3259.625245  
 Free energy in DCM = -3259.964199  
 Free energy in heptane = -3259.966381  
 Number of imaginary frequencies = 1 (-391.55)

**TS 18b+cpReX**

|    |   |           |           |           |
|----|---|-----------|-----------|-----------|
| C  | 0 | 0.556528  | 4.456333  | 0.258303  |
| C  | 0 | -0.759291 | 3.701143  | 0.265927  |
| C  | 0 | -0.563174 | 2.778362  | -0.898470 |
| C  | 0 | 0.392430  | 3.333775  | -1.737648 |
| C  | 0 | 1.030265  | 4.394727  | -1.068382 |
| H  | 0 | 0.720988  | 5.321440  | 0.894945  |
| H  | 0 | -1.555389 | 4.419814  | 0.004671  |
| H  | 0 | -1.040787 | 3.221307  | 1.203494  |
| H  | 0 | -1.240579 | 1.972815  | -1.155868 |
| H  | 0 | 0.656463  | 2.965362  | -2.723394 |
| H  | 0 | 1.854654  | 4.978360  | -1.465578 |
| C  | 0 | 0.639187  | -3.222667 | 1.015353  |
| C  | 0 | 0.710763  | -1.829446 | 1.670459  |
| C  | 0 | 0.274482  | -0.736610 | 0.655287  |
| C  | 0 | -1.195589 | -0.969617 | 0.182787  |
| C  | 0 | -1.651774 | -2.419312 | 0.031563  |
| C  | 0 | -0.743942 | -3.558849 | 0.465730  |
| C  | 0 | 2.113427  | -1.572996 | 2.238094  |
| C  | 0 | -1.129033 | -3.402064 | -0.998688 |
| C  | 0 | -0.113952 | -2.981339 | -2.046740 |
| C  | 0 | -2.135461 | -4.409638 | -1.536758 |
| Br | 0 | -0.565383 | 1.164180  | 2.861546  |
| B  | 0 | 0.456238  | 0.735891  | 1.214041  |
| C  | 0 | 1.368595  | 1.797251  | 0.642615  |
| C  | 0 | 1.678788  | 3.047354  | 1.206593  |
| H  | 0 | 1.406768  | -3.281924 | 0.230198  |
| H  | 0 | 0.917354  | -3.980171 | 1.759185  |
| H  | 0 | -0.003600 | -1.807088 | 2.506233  |
| H  | 0 | 0.947689  | -0.825354 | -0.212411 |
| H  | 0 | -1.364771 | -0.420937 | -0.755152 |
| H  | 0 | -1.855676 | -0.507781 | 0.927263  |
| H  | 0 | -2.707851 | -2.546539 | 0.269155  |
| H  | 0 | -1.237095 | -4.384297 | 0.977137  |
| H  | 0 | 2.860320  | -1.507403 | 1.435709  |
| H  | 0 | 2.152168  | -0.638199 | 2.808643  |
| H  | 0 | 2.419441  | -2.384591 | 2.909871  |
| H  | 0 | 0.446588  | -3.850503 | -2.416554 |
| H  | 0 | -0.620801 | -2.529650 | -2.909871 |
| H  | 0 | 0.611693  | -2.254096 | -1.677285 |
| H  | 0 | -2.860320 | -4.704545 | -0.769318 |
| H  | 0 | -2.698492 | -3.995118 | -2.384010 |
| H  | 0 | -1.633335 | -5.321440 | -1.887489 |
| H  | 0 | 1.946592  | 1.511240  | -0.237002 |
| H  | 0 | 2.648381  | 3.494504  | 1.002155  |
| H  | 0 | 1.303130  | 3.254310  | 2.207114  |

Energy + ZPE = -3259.576745  
 Free energy = -3259.625717  
 Free energy in DCM = -3259.963395

Free energy in heptane = -3259.965932  
 Number of imaginary frequencies = 1 (-398.97)

**TS 18b+cpSiN**

|    |   |           |           |           |
|----|---|-----------|-----------|-----------|
| C  | 0 | 2.398487  | 2.655207  | 0.297731  |
| C  | 0 | 3.402184  | 2.536511  | 1.411077  |
| C  | 0 | 4.443480  | 1.641187  | 0.758682  |
| C  | 0 | 4.314282  | 1.852468  | -0.628497 |
| C  | 0 | 3.055670  | 2.421426  | -0.898225 |
| H  | 0 | 1.420005  | 3.107928  | 0.405779  |
| H  | 0 | 3.013766  | 2.200328  | 2.373589  |
| H  | 0 | 3.859937  | 3.528652  | 1.566390  |
| H  | 0 | 5.408839  | 1.462278  | 1.224631  |
| H  | 0 | 5.013774  | 1.505780  | -1.381219 |
| H  | 0 | 2.638557  | 2.566680  | -1.887415 |
| C  | 0 | -2.619521 | 0.080296  | -1.210757 |
| C  | 0 | -1.098163 | 0.198564  | -1.436563 |
| C  | 0 | -0.331181 | -0.303739 | -0.189692 |
| C  | 0 | -0.658645 | -1.809651 | 0.098878  |
| C  | 0 | -2.086669 | -2.270474 | -0.186543 |
| C  | 0 | -3.073365 | -1.335167 | -0.866012 |
| C  | 0 | -0.729505 | 1.638439  | -1.814035 |
| C  | 0 | -3.327035 | -1.814410 | 0.556882  |
| C  | 0 | -3.239212 | -0.869416 | 1.742239  |
| C  | 0 | -4.425641 | -2.854928 | 0.725393  |
| Br | 0 | 2.159811  | -0.730939 | -1.890421 |
| B  | 0 | 1.250649  | -0.206219 | -0.213720 |
| C  | 0 | 2.125054  | 0.092987  | 0.984037  |
| C  | 0 | 3.512410  | -0.121817 | 1.075423  |
| H  | 0 | -2.914601 | 0.795705  | -0.429072 |
| H  | 0 | -3.140501 | 0.405636  | -2.120182 |
| H  | 0 | -0.825253 | -0.451807 | -2.280296 |
| H  | 0 | -0.674147 | 0.297857  | 0.667495  |
| H  | 0 | -0.373463 | -2.050779 | 1.132066  |
| H  | 0 | -0.004952 | -2.416391 | -0.541590 |
| H  | 0 | -2.124792 | -3.309072 | -0.514896 |
| H  | 0 | -3.713943 | -1.792173 | -1.618982 |
| H  | 0 | -0.910050 | 2.326486  | -0.976623 |
| H  | 0 | 0.324571  | 1.713085  | -2.098759 |
| H  | 0 | -1.330090 | 1.988993  | -2.662630 |
| H  | 0 | -4.192205 | -0.343857 | 1.890952  |
| H  | 0 | -3.028813 | -1.429937 | 2.662630  |
| H  | 0 | -2.459301 | -0.113021 | 1.635353  |
| H  | 0 | -4.478088 | -3.528652 | -0.137529 |
| H  | 0 | -4.255033 | -3.471314 | 1.618349  |
| H  | 0 | -5.408839 | -2.377608 | 0.834875  |
| H  | 0 | 1.619782  | 0.398464  | 1.902232  |
| H  | 0 | 3.951478  | -0.257842 | 2.063097  |
| H  | 0 | 3.987574  | -0.716219 | 0.300473  |

Energy + ZPE = -3259.575524  
 Free energy = -3259.624611  
 Free energy in DCM = -3259.963658  
 Free energy in heptane = -3259.965747  
 Number of imaginary frequencies = 1 (-395.53)

**TS 18b+cpSiX**

|    |   |           |           |           |
|----|---|-----------|-----------|-----------|
| C  | 0 | -1.451394 | 4.536204  | -1.296635 |
| C  | 0 | -0.024494 | 4.023802  | -1.344079 |
| C  | 0 | -0.212436 | 2.729651  | -2.077068 |
| C  | 0 | -1.386045 | 2.813930  | -2.812652 |
| C  | 0 | -2.113039 | 3.942709  | -2.390466 |
| H  | 0 | -1.687442 | 5.537381  | -0.946371 |
| H  | 0 | 0.497315  | 3.953345  | -0.389322 |
| H  | 0 | 0.552443  | 4.705922  | -1.992476 |
| H  | 0 | 0.565337  | 1.987119  | -2.206862 |
| H  | 0 | -1.725452 | 2.087214  | -3.543348 |
| H  | 0 | -3.094906 | 4.226174  | -2.756053 |
| C  | 0 | 1.416737  | -2.121786 | 0.634065  |
| C  | 0 | 1.336496  | -0.582947 | 0.705258  |
| C  | 0 | -0.141806 | -0.126437 | 0.756312  |
| C  | 0 | -0.858534 | -0.698837 | 2.026500  |
| C  | 0 | -0.459005 | -2.106988 | 2.462500  |
| C  | 0 | 0.699283  | -2.821054 | 1.785321  |
| C  | 0 | 2.108690  | 0.043896  | -0.462564 |
| C  | 0 | -0.712979 | -3.380833 | 1.679864  |
| C  | 0 | -1.478666 | -3.371940 | 0.368201  |
| C  | 0 | -1.002154 | -4.625828 | 2.507585  |
| Br | 0 | 0.763824  | 2.548098  | 1.887442  |
| B  | 0 | -0.421484 | 1.433111  | 0.755642  |
| C  | 0 | -1.605983 | 2.094087  | 0.084231  |
| C  | 0 | -2.075272 | 3.403925  | 0.282595  |
| H  | 0 | 1.021808  | -2.448820 | -0.339037 |
| H  | 0 | 2.471786  | -2.423582 | 0.641154  |
| H  | 0 | 1.817836  | -0.257074 | 1.638704  |
| H  | 0 | -0.639891 | -0.533299 | -0.137868 |
| H  | 0 | -1.946619 | -0.630466 | 1.891165  |
| H  | 0 | -0.618735 | -0.034648 | 2.867651  |
| H  | 0 | -0.519157 | -2.233742 | 3.543348  |
| H  | 0 | 1.360041  | -3.380166 | 2.446178  |
| H  | 0 | 1.633461  | -0.192648 | -1.424717 |
| H  | 0 | 2.161253  | 1.132751  | -0.359614 |
| H  | 0 | 3.137199  | -0.335714 | -0.503483 |
| H  | 0 | -1.229541 | -4.258362 | -0.230711 |
| H  | 0 | -2.559956 | -3.399636 | 0.556764  |
| H  | 0 | -1.277412 | -2.492780 | -0.246826 |
| H  | 0 | -0.441560 | -4.624028 | 3.449492  |
| H  | 0 | -2.069620 | -4.697022 | 2.756334  |
| H  | 0 | -0.728404 | -5.537381 | 1.959251  |
| H  | 0 | -2.249356 | 1.438358  | -0.504223 |
| H  | 0 | -3.137199 | 3.609056  | 0.173869  |
| H  | 0 | -1.589517 | 4.001616  | 1.051769  |

Energy + ZPE = -3259.576285  
 Free energy = -3259.624879  
 Free energy in DCM = -3259.963375  
 Free energy in heptane = -3259.966053  
 Number of imaginary frequencies = 1 (-400.68)

**Product 18b+cpReN**

|   |   |           |          |          |
|---|---|-----------|----------|----------|
| C | 0 | -0.659904 | 2.615967 | 0.839608 |
|---|---|-----------|----------|----------|

|    |   |           |           |           |
|----|---|-----------|-----------|-----------|
| C  | 0 | -0.579125 | 4.141359  | 0.599001  |
| C  | 0 | 0.944680  | 4.201969  | 0.848194  |
| C  | 0 | 1.027900  | 3.457265  | 2.171641  |
| C  | 0 | 0.077655  | 2.511877  | 2.165291  |
| C  | 0 | -0.723535 | -2.570824 | -2.092966 |
| C  | 0 | 0.327631  | -1.550612 | -1.614154 |
| C  | 0 | -0.309235 | -0.567471 | -0.590690 |
| C  | 0 | -0.836551 | -1.329129 | 0.667654  |
| C  | 0 | -1.444678 | -2.708468 | 0.423622  |
| C  | 0 | -1.371113 | -3.350883 | -0.952240 |
| C  | 0 | 0.953879  | -0.819064 | -2.809507 |
| C  | 0 | -2.720464 | -2.990071 | -0.345802 |
| C  | 0 | -3.572073 | -1.866573 | -0.910725 |
| C  | 0 | -3.560996 | -4.155938 | 0.156840  |
| Br | 0 | 2.353784  | 0.054711  | 0.669845  |
| B  | 0 | 0.674230  | 0.593381  | -0.159537 |
| C  | 0 | 0.343060  | 2.117078  | -0.313701 |
| C  | 0 | 1.460701  | 3.206052  | -0.250611 |
| H  | 0 | -1.647831 | 2.151949  | 0.791047  |
| H  | 0 | -1.153411 | 4.712163  | 1.336026  |
| H  | 0 | -0.874544 | 4.439927  | -0.414142 |
| H  | 0 | 1.417898  | 5.186530  | 0.816847  |
| H  | 0 | 1.807974  | 3.597188  | 2.913339  |
| H  | 0 | -0.074533 | 1.728793  | 2.901339  |
| H  | 0 | -1.477413 | -2.042158 | -2.693990 |
| H  | 0 | -0.241913 | -3.279874 | -2.778065 |
| H  | 0 | 1.126024  | -2.096787 | -1.091645 |
| H  | 0 | -1.161536 | -0.090491 | -1.099346 |
| H  | 0 | -1.548618 | -0.688699 | 1.207593  |
| H  | 0 | 0.012369  | -1.476842 | 1.345979  |
| H  | 0 | -1.276443 | -3.382558 | 1.263130  |
| H  | 0 | -1.149130 | -4.416856 | -0.961889 |
| H  | 0 | 0.212338  | -0.196538 | -3.327753 |
| H  | 0 | 1.781887  | -0.170922 | -2.497678 |
| H  | 0 | 1.354035  | -1.532363 | -3.540119 |
| H  | 0 | -4.198266 | -2.232726 | -1.735328 |
| H  | 0 | -4.247091 | -1.473143 | -0.139369 |
| H  | 0 | -2.987555 | -1.026613 | -1.291586 |
| H  | 0 | -2.935141 | -4.958768 | 0.562890  |
| H  | 0 | -4.247993 | -3.835655 | 0.951601  |
| H  | 0 | -4.167097 | -4.583667 | -0.652969 |
| H  | 0 | -0.220532 | 2.223181  | -1.252823 |
| H  | 0 | 1.557406  | 3.716001  | -1.216244 |
| H  | 0 | 2.438487  | 2.791906  | 0.007452  |

Energy + ZPE = -3259.617370  
 Free energy = -3259.666145  
 Free energy in DCM = -3260.007146  
 Free energy in heptane = -3260.010718  
 Number of imaginary frequencies = 0

**Product 18b+cpReX**

|   |   |           |           |          |
|---|---|-----------|-----------|----------|
| C | 0 | -2.697861 | -2.473301 | 2.343052 |
| C | 0 | -2.524456 | -0.946722 | 2.516078 |
| C | 0 | -0.983546 | -1.010946 | 2.428870 |
| C | 0 | -0.693420 | -2.112689 | 3.434056 |

|    |   |           |           |           |
|----|---|-----------|-----------|-----------|
| C  | 0 | -1.716158 | -2.978983 | 3.387949  |
| C  | 0 | 2.459731  | 0.621466  | -2.245850 |
| C  | 0 | 1.069541  | 0.012429  | -1.982169 |
| C  | 0 | 0.708268  | 0.136966  | -0.474873 |
| C  | 0 | 0.666094  | 1.634706  | -0.026284 |
| C  | 0 | 1.682071  | 2.570991  | -0.677327 |
| C  | 0 | 2.570150  | 2.079229  | -1.809407 |
| C  | 0 | 1.014822  | -1.441284 | -2.472922 |
| C  | 0 | 3.185424  | 2.515953  | -0.487440 |
| C  | 0 | 3.831586  | 1.516753  | 0.456561  |
| C  | 0 | 3.910993  | 3.854504  | -0.498021 |
| Br | 0 | -2.241979 | 0.055277  | -1.057046 |
| B  | 0 | -0.651806 | -0.583144 | -0.112609 |
| C  | 0 | -0.797529 | -1.698747 | 0.979317  |
| C  | 0 | -2.012871 | -2.678078 | 0.945528  |
| H  | 0 | -3.714252 | -2.870414 | 2.401377  |
| H  | 0 | -2.869735 | -0.588081 | 3.490811  |
| H  | 0 | -2.985208 | -0.358383 | 1.716206  |
| H  | 0 | -0.432389 | -0.077368 | 2.567041  |
| H  | 0 | 0.237310  | -2.215213 | 3.983706  |
| H  | 0 | -1.791504 | -3.932979 | 3.900858  |
| H  | 0 | 3.217243  | -0.003386 | -1.751629 |
| H  | 0 | 2.676229  | 0.556036  | -3.319628 |
| H  | 0 | 0.326257  | 0.592504  | -2.547361 |
| H  | 0 | 1.503909  | -0.378255 | 0.085298  |
| H  | 0 | 0.746715  | 1.688363  | 1.068780  |
| H  | 0 | -0.326383 | 2.028625  | -0.275398 |
| H  | 0 | 1.288160  | 3.579743  | -0.798320 |
| H  | 0 | 2.714997  | 2.778952  | -2.631038 |
| H  | 0 | 1.688664  | -2.082521 | -1.889461 |
| H  | 0 | 0.002325  | -1.856287 | -2.396525 |
| H  | 0 | 1.318861  | -1.512883 | -3.524190 |
| H  | 0 | 4.872773  | 1.325423  | 0.164334  |
| H  | 0 | 3.848266  | 1.914504  | 1.479683  |
| H  | 0 | 3.317918  | 0.553632  | 0.490326  |
| H  | 0 | 3.439237  | 4.563593  | -1.187744 |
| H  | 0 | 3.912907  | 4.312358  | 0.500212  |
| H  | 0 | 4.957172  | 3.733541  | -0.809424 |
| H  | 0 | 0.150655  | -2.250674 | 1.002433  |
| H  | 0 | -1.698096 | -3.715140 | 0.792761  |
| H  | 0 | -2.710722 | -2.418174 | 0.143756  |

Energy + ZPE = -3259.618390  
Free energy = -3259.666635  
Free energy in DCM = -3260.008247  
Free energy in heptane = -3260.012041  
Number of imaginary frequencies = 0

**Product 18b+cpSiN**

|   |   |           |           |           |
|---|---|-----------|-----------|-----------|
| C | 0 | -2.115955 | 1.995618  | -1.882081 |
| C | 0 | -1.940235 | 3.529095  | -1.972566 |
| C | 0 | -0.398429 | 3.446222  | -2.057039 |
| C | 0 | -0.243934 | 2.419589  | -3.170824 |
| C | 0 | -1.264343 | 1.555919  | -3.067674 |
| C | 0 | 0.845916  | -1.468536 | 2.903060  |
| C | 0 | -0.301529 | -1.173734 | 1.917128  |

|    |   |           |           |           |
|----|---|-----------|-----------|-----------|
| C  | 0 | 0.206417  | -0.254933 | 0.771613  |
| C  | 0 | 1.357662  | -0.942513 | -0.035986 |
| C  | 0 | 2.327622  | -1.805360 | 0.768026  |
| C  | 0 | 2.066152  | -2.097794 | 2.236475  |
| C  | 0 | -1.505089 | -0.569922 | 2.653300  |
| C  | 0 | 3.297734  | -1.305213 | 1.820628  |
| C  | 0 | 3.434006  | 0.173308  | 2.140003  |
| C  | 0 | 4.627965  | -2.040898 | 1.906720  |
| Br | 0 | -1.985774 | -1.219951 | -1.054326 |
| B  | 0 | -0.917216 | 0.200396  | -0.239258 |
| C  | 0 | -1.274710 | 1.686332  | -0.586893 |
| C  | 0 | -0.070060 | 2.694425  | -0.720546 |
| H  | 0 | -3.133193 | 1.601627  | -1.849241 |
| H  | 0 | -2.303219 | 4.065185  | -1.086541 |
| H  | 0 | -2.391057 | 3.958109  | -2.872834 |
| H  | 0 | 0.149194  | 4.383899  | -2.182564 |
| H  | 0 | 0.610747  | 2.353815  | -3.837335 |
| H  | 0 | -1.416464 | 0.639591  | -3.627131 |
| H  | 0 | 1.110608  | -0.535657 | 3.421447  |
| H  | 0 | 0.478339  | -2.147503 | 3.682639  |
| H  | 0 | -0.619772 | -2.123170 | 1.463953  |
| H  | 0 | 0.603895  | 0.656219  | 1.243968  |
| H  | 0 | 1.906084  | -0.182381 | -0.610019 |
| H  | 0 | 0.893214  | -1.603437 | -0.778122 |
| H  | 0 | 2.703172  | -2.645680 | 0.184677  |
| H  | 0 | 2.269011  | -3.118913 | 2.555565  |
| H  | 0 | -1.262708 | 0.417032  | 3.069738  |
| H  | 0 | -2.367896 | -0.455740 | 1.986416  |
| H  | 0 | -1.817881 | -1.210995 | 3.486272  |
| H  | 0 | 4.136545  | 0.651880  | 1.445294  |
| H  | 0 | 2.491053  | 0.720255  | 2.078086  |
| H  | 0 | 3.830972  | 0.314630  | 3.154197  |
| H  | 0 | 4.514490  | -3.107247 | 1.680604  |
| H  | 0 | 5.356715  | -1.626160 | 1.197479  |
| H  | 0 | 5.060244  | -1.958332 | 2.912912  |
| H  | 0 | -1.875284 | 2.003587  | 0.287395  |
| H  | 0 | -0.039829 | 3.393979  | 0.122538  |
| H  | 0 | 0.906116  | 2.202052  | -0.771776 |

Energy + ZPE = -3259.617645  
Free energy = -3259.666006  
Free energy in DCM = -3260.007207  
Free energy in heptane = -3260.010786  
Number of imaginary frequencies = 0

**Product 18b+cpSiX**

|   |   |           |           |           |
|---|---|-----------|-----------|-----------|
| C | 0 | -2.550008 | -2.323495 | -2.638849 |
| C | 0 | -2.611465 | -0.780006 | -2.705796 |
| C | 0 | -1.075981 | -0.617109 | -2.668331 |
| C | 0 | -0.666202 | -1.592747 | -3.758871 |
| C | 0 | -1.546116 | -2.604690 | -3.745169 |
| C | 0 | 1.855034  | 2.519100  | 1.055782  |
| C | 0 | 0.474821  | 1.931996  | 0.698049  |
| C | 0 | 0.610031  | 0.432188  | 0.340405  |
| C | 0 | 1.175783  | -0.392526 | 1.550656  |

|    |   |           |           |           |   |   |           |           |           |
|----|---|-----------|-----------|-----------|---|---|-----------|-----------|-----------|
| C  | 0 | 2.231953  | 0.304014  | 2.406383  | C | 0 | -2.083866 | 0.106605  | 1.700035  |
| C  | 0 | 2.561593  | 1.770714  | 2.182557  | C | 0 | -3.132546 | 0.593923  | -1.495525 |
| C  | 0 | -0.173017 | 2.741722  | -0.433225 | C | 0 | -2.488527 | -1.447309 | -1.832288 |
| C  | 0 | 3.621130  | 0.702527  | 1.947606  | O | 0 | -1.013676 | -0.077435 | 2.634290  |
| C  | 0 | 4.125906  | 0.370011  | 0.554119  | C | 0 | -4.516012 | 0.570486  | -2.170981 |
| C  | 0 | 4.721391  | 0.610583  | 2.996371  | C | 0 | -2.903750 | 2.019219  | -0.978788 |
| Br | 0 | -2.336210 | 0.059303  | 0.888345  | H | 0 | 2.240928  | 1.059761  | -0.166277 |
| B  | 0 | -0.699300 | -0.322851 | -0.109840 | H | 0 | -0.314371 | 1.014178  | 0.118855  |
| C  | 0 | -0.730431 | -1.365780 | -1.280459 | H | 0 | 4.382853  | -0.039830 | -0.484431 |
| C  | 0 | -1.789791 | -2.513098 | -1.278456 | H | 0 | 3.609601  | -1.683863 | -0.355838 |
| H  | 0 | -3.497726 | -2.864591 | -2.696071 | H | 0 | -1.512749 | -1.635547 | 0.668886  |
| H  | 0 | -3.122427 | -0.324151 | -1.852016 | H | 0 | -0.301243 | 1.222725  | -2.134108 |
| H  | 0 | -3.044709 | -0.412302 | -3.641251 | H | 0 | 0.063835  | -0.465903 | -2.415555 |
| H  | 0 | -0.675691 | 0.396125  | -2.753615 | H | 0 | -3.830879 | -1.023932 | -0.035948 |
| H  | 0 | 0.246483  | -1.516515 | -4.342097 | H | 0 | -2.091109 | 0.096308  | -3.471408 |
| H  | 0 | -1.499440 | -3.522494 | -4.323383 | H | 0 | -3.012038 | -0.334116 | 2.098208  |
| H  | 0 | 2.472463  | 2.544642  | 0.146238  | H | 0 | -2.267874 | 1.178908  | 1.540028  |
| H  | 0 | 1.726603  | 3.566754  | 1.355095  | H | 0 | -1.712459 | -2.206196 | -1.689014 |
| H  | 0 | -0.171468 | 2.007967  | 1.584177  | H | 0 | -3.316779 | -1.891114 | -2.389040 |
| H  | 0 | 1.327218  | 0.356161  | -0.491751 | H | 0 | -1.280716 | 0.331257  | 3.471408  |
| H  | 0 | 1.549599  | -1.361636 | 1.191748  | H | 0 | -4.781297 | -0.408497 | -2.579860 |
| H  | 0 | 0.336786  | -0.620806 | 2.221462  | H | 0 | -5.297792 | 0.850040  | -1.452699 |
| H  | 0 | 2.182720  | -0.011803 | 3.448225  | H | 0 | -4.552728 | 1.293788  | -2.995787 |
| H  | 0 | 2.707129  | 2.362178  | 3.085148  | H | 0 | -3.665885 | 2.292572  | -0.237224 |
| H  | 0 | 0.400914  | 2.649781  | -1.365349 | H | 0 | -1.924141 | 2.169235  | -0.521961 |
| H  | 0 | -1.197699 | 2.406743  | -0.627169 | H | 0 | -2.992036 | 2.735482  | -1.806599 |
| H  | 0 | -0.216911 | 3.807592  | -0.178428 | C | 0 | 4.223944  | -0.669564 | 1.814653  |
| H  | 0 | 4.960951  | 1.028116  | 0.279266  | C | 0 | 3.578826  | 0.637396  | 2.242048  |
| H  | 0 | 4.499319  | -0.661772 | 0.518724  | C | 0 | 3.453095  | -1.688187 | 2.406969  |
| H  | 0 | 3.363534  | 0.467717  | -0.221212 | C | 0 | 2.162195  | 0.183613  | 2.466978  |
| H  | 0 | 4.344686  | 0.844568  | 3.998601  | C | 0 | 2.191353  | -1.173443 | 2.754571  |
| H  | 0 | 5.153207  | -0.398612 | 3.030493  | H | 0 | 5.297792  | -0.758746 | 1.673638  |
| H  | 0 | 5.536274  | 1.312619  | 2.774758  | H | 0 | 4.006590  | 0.919974  | 3.219605  |
| H  | 0 | 0.285544  | -1.770616 | -1.375533 | H | 0 | 3.712598  | 1.484318  | 1.567273  |
| H  | 0 | -1.323209 | -3.500306 | -1.203107 | H | 0 | 3.732908  | -2.735482 | 2.451664  |
| H  | 0 | -2.488044 | -2.407074 | -0.442421 | H | 0 | 1.316211  | 0.835345  | 2.640293  |
|    |   |           |           |           | H | 0 | 1.338133  | -1.753124 | 3.085162  |

Energy + ZPE = -3259.618874

Free energy = -3259.667160

Free energy in DCM = -3260.008822

Free energy in heptane = -3260.012630

Number of imaginary frequencies = 0

Energy + ZPE = -1223.256574

Free energy = -1223.304539

Free energy in DCM = -1223.657144

Free energy in heptane = -1223.656179

Number of imaginary frequencies = 1 (-405.60)

## Diels-Alder reaction with Vinylborane (19a)

### TS 19a+cpReN

|    |   |           |           |           |
|----|---|-----------|-----------|-----------|
| Cl | 0 | 0.924526  | -2.563618 | -0.093077 |
| B  | 0 | 0.924526  | -0.742426 | -0.093077 |
| C  | 0 | 2.266655  | -0.028861 | -0.093077 |
| C  | 0 | -0.457469 | 0.011304  | -0.303217 |
| C  | 0 | 3.537013  | -0.625119 | -0.126481 |
| C  | 0 | -1.727918 | -0.596051 | 0.388992  |
| C  | 0 | -0.614352 | 0.204933  | -1.870518 |
| C  | 0 | -2.938480 | -0.665503 | -0.566846 |
| C  | 0 | -2.032693 | -0.073554 | -2.388115 |

### TS 19a+cpReX

|   |   |           |           |          |
|---|---|-----------|-----------|----------|
| C | 0 | -1.043477 | 1.255952  | 2.550812 |
| C | 0 | -1.043477 | 2.756767  | 2.550812 |
| C | 0 | -2.366823 | 0.832570  | 2.550812 |
| C | 0 | -2.407496 | 3.048069  | 1.956128 |
| C | 0 | -3.202974 | 1.923926  | 2.249977 |
| H | 0 | -0.168758 | 0.652958  | 2.767609 |
| H | 0 | -1.057901 | 3.095995  | 3.601149 |
| H | 0 | -0.192912 | 3.230845  | 2.061199 |
| H | 0 | -2.698457 | -0.192381 | 2.681606 |
| H | 0 | -2.811403 | 4.055813  | 1.909585 |
| H | 0 | -4.280384 | 1.871170  | 2.128293 |

|    |   |           |           |           |    |   |           |           |           |
|----|---|-----------|-----------|-----------|----|---|-----------|-----------|-----------|
| Cl | 0 | 1.469483  | 2.831186  | -0.038497 | B  | 0 | 1.172871  | 0.730949  | 0.403150  |
| B  | 0 | 0.391072  | 1.355749  | -0.127760 | Cl | 0 | 2.320631  | 2.150674  | 0.422776  |
| C  | 0 | -1.112493 | 1.538220  | -0.035675 | C  | 0 | 0.045700  | 0.799867  | -0.716117 |
| C  | 0 | 1.044914  | -0.057816 | -0.439269 | C  | 0 | -1.319194 | 0.099482  | -0.379018 |
| C  | 0 | -1.850989 | 2.731174  | -0.005750 | C  | 0 | 0.728119  | 0.267986  | -2.048285 |
| C  | 0 | 2.537250  | -0.284167 | -0.039589 | C  | 0 | -1.817309 | -0.797454 | -1.530938 |
| C  | 0 | 0.737728  | -0.439711 | -1.940965 | C  | 0 | -0.152305 | -0.709235 | -2.839869 |
| C  | 0 | 3.282030  | -1.200219 | -1.036290 | C  | 0 | -2.383659 | 1.110843  | 0.073555  |
| C  | 0 | 1.846480  | -1.282959 | -2.593334 | C  | 0 | -1.626753 | -0.201263 | -2.978565 |
| C  | 0 | 2.668479  | -0.746639 | 1.415957  | C  | 0 | -0.674524 | -1.796842 | -1.866276 |
| C  | 0 | 2.425794  | -2.380875 | -1.633825 | O  | 0 | -2.016602 | 1.832380  | 1.251821  |
| C  | 0 | 3.186015  | -0.518427 | -2.429835 | C  | 0 | -2.423937 | -1.016774 | -4.013745 |
| O  | 0 | 2.086097  | 0.175440  | 2.341374  | C  | 0 | -1.873336 | 1.281259  | -3.282007 |
| C  | 0 | 3.323625  | -3.381402 | -2.387747 | H  | 0 | 2.933490  | -1.683620 | 2.287759  |
| C  | 0 | 1.477800  | -3.213738 | -0.761192 | H  | 0 | 3.493502  | -0.002151 | 1.880537  |
| H  | 0 | -1.698781 | 0.625020  | -0.146972 | H  | 0 | 0.780305  | -1.291715 | 1.263386  |
| H  | 0 | 0.455218  | -0.751763 | 0.172580  | H  | 0 | -0.175174 | 1.859117  | -0.904664 |
| H  | 0 | -2.855623 | 2.743615  | -0.420210 | H  | 0 | -1.175436 | -0.572960 | 0.478079  |
| H  | 0 | -1.318463 | 3.672946  | -0.123002 | H  | 0 | 1.007512  | 1.127487  | -2.668350 |
| H  | 0 | 3.067757  | 0.678720  | -0.093482 | H  | 0 | 1.667807  | -0.253335 | -1.820270 |
| H  | 0 | -0.223389 | -0.967271 | -1.979068 | H  | 0 | -2.807945 | -1.211769 | -1.299176 |
| H  | 0 | 0.610086  | 0.460519  | -2.557648 | H  | 0 | 0.357252  | -1.033110 | -3.756747 |
| H  | 0 | 4.280384  | -1.458610 | -0.657884 | H  | 0 | -2.630645 | 1.811447  | -0.736513 |
| H  | 0 | 1.549911  | -1.601853 | -3.601149 | H  | 0 | -3.304508 | 0.579860  | 0.338994  |
| H  | 0 | 3.732047  | -0.907433 | 1.657111  | H  | 0 | -0.010765 | -2.081070 | -1.041834 |
| H  | 0 | 2.147322  | -1.694167 | 1.585761  | H  | 0 | -1.016794 | -2.705473 | -2.366241 |
| H  | 0 | 3.132815  | 0.576259  | -2.435205 | H  | 0 | -1.250002 | 2.383179  | 1.027731  |
| H  | 0 | 3.961760  | -0.833675 | -3.130585 | H  | 0 | -3.493502 | -0.780019 | -3.945041 |
| H  | 0 | 2.449247  | 1.053496  | 2.139853  | H  | 0 | -2.096480 | -0.769359 | -5.031586 |
| H  | 0 | 4.051323  | -2.904511 | -3.050043 | H  | 0 | -2.319016 | -2.098048 | -3.887837 |
| H  | 0 | 3.884052  | -4.001525 | -1.676242 | H  | 0 | -2.936352 | 1.531363  | -3.172035 |
| H  | 0 | 2.712332  | -4.055813 | -3.000932 | H  | 0 | -1.303682 | 1.962308  | -2.647849 |
| H  | 0 | 2.046402  | -3.807851 | -0.033732 | H  | 0 | -1.598678 | 1.499031  | -4.322607 |
| H  | 0 | 0.746346  | -2.625166 | -0.207119 |    |   |           |           |           |
| H  | 0 | 0.920138  | -3.923552 | -1.386383 |    |   |           |           |           |

Energy + ZPE = -1223.259775  
Free energy = -1223.307780  
Free energy in DCM = -1223.656787  
Free energy in heptane = -1223.657499  
Number of imaginary frequencies = 1 (-403.57)

Energy + ZPE = -1223.257460  
Free energy = -1223.305401  
Free energy in DCM = -1223.656166  
Free energy in heptane = -1223.656056  
Number of imaginary frequencies = 1 (-396.69)

#### TS 19a+cpSiX

#### TS 19a+cpSiN

|   |   |           |           |          |
|---|---|-----------|-----------|----------|
| C | 0 | 2.235243  | -0.202144 | 3.981116 |
| C | 0 | 2.235243  | 1.207027  | 3.981116 |
| C | 0 | 0.771581  | -0.612138 | 3.981116 |
| C | 0 | 0.982922  | 1.671950  | 3.540279 |
| C | 0 | 0.139385  | 0.591165  | 3.338290 |
| H | 0 | 2.987317  | -0.777295 | 4.514841 |
| H | 0 | 3.105390  | 1.830532  | 4.157487 |
| H | 0 | 0.435479  | -0.652584 | 5.031586 |
| H | 0 | 0.540413  | -1.576344 | 3.526440 |
| H | 0 | 0.748491  | 2.705473  | 3.312160 |
| H | 0 | -0.886276 | 0.654500  | 2.995880 |
| C | 0 | 2.646169  | -0.659756 | 2.051418 |
| C | 0 | 1.477793  | -0.453988 | 1.294807 |

|    |   |           |           |           |
|----|---|-----------|-----------|-----------|
| C  | 0 | -1.713398 | 0.222240  | 2.572411  |
| C  | 0 | -1.713398 | 1.610268  | 2.572411  |
| C  | 0 | -3.138689 | -0.240548 | 2.572411  |
| C  | 0 | -3.012125 | 2.073073  | 2.287268  |
| C  | 0 | -3.841843 | 0.972525  | 1.993527  |
| H  | 0 | -0.868750 | -0.429241 | 2.766551  |
| H  | 0 | -0.838377 | 2.239632  | 2.697991  |
| H  | 0 | -3.461517 | -0.344836 | 3.622911  |
| H  | 0 | -3.325660 | -1.191663 | 2.074706  |
| H  | 0 | -3.293796 | 3.115478  | 2.175372  |
| H  | 0 | -4.925647 | 1.050387  | 1.971404  |
| C  | 0 | -2.060397 | 0.229578  | -0.060603 |
| C  | 0 | -3.421499 | 0.570102  | 0.039419  |
| B  | 0 | -1.455558 | -1.145875 | -0.239242 |
| Cl | 0 | -2.513878 | -2.627564 | -0.034007 |

|   |   |           |           |           |   |   |           |           |           |
|---|---|-----------|-----------|-----------|---|---|-----------|-----------|-----------|
| C | 0 | 0.031632  | -1.434407 | -0.728994 | O | 0 | 0.225565  | -0.824262 | 1.634233  |
| C | 0 | 1.145757  | -0.846109 | 0.212130  | C | 0 | -4.486065 | 1.106294  | -1.698617 |
| C | 0 | 0.191410  | -0.993990 | -2.237137 | C | 0 | -2.418540 | 2.135148  | -0.795858 |
| C | 0 | 2.346774  | -0.291867 | -0.583885 | H | 0 | 2.713116  | -0.081199 | -0.894425 |
| C | 0 | 1.557325  | -0.360842 | -2.550573 | H | 0 | -0.427588 | 0.854247  | -0.327228 |
| C | 0 | 1.559335  | -1.866767 | 1.282245  | H | 0 | 4.182994  | -0.986624 | 0.644989  |
| C | 0 | 2.748229  | -1.116649 | -1.866897 | H | 0 | 2.924567  | -1.268444 | 1.836889  |
| C | 0 | 1.792968  | 0.796814  | -1.545827 | H | 0 | -1.478320 | -1.940825 | 0.095986  |
| O | 0 | 0.480630  | -2.252432 | 2.137410  | H | 0 | -0.223690 | 0.666141  | -2.632946 |
| C | 0 | 4.112519  | -0.648110 | -2.409717 | H | 0 | -0.401463 | -1.082731 | -2.655394 |
| C | 0 | 2.775378  | -2.650568 | -1.872013 | H | 0 | 1.771434  | 2.163175  | -0.336204 |
| H | 0 | -1.376508 | 1.069157  | -0.193622 | H | 0 | -3.795667 | -0.700006 | 0.264611  |
| H | 0 | -3.753744 | 1.525635  | -0.358560 | H | 0 | -2.504467 | 0.196855  | -3.448974 |
| H | 0 | -4.157226 | -0.224215 | -0.072199 | H | 0 | -1.702572 | -1.144101 | 2.353443  |
| H | 0 | 0.170361  | -2.521613 | -0.721524 | H | 0 | -1.361330 | 0.539984  | 1.852386  |
| H | 0 | 0.735485  | 0.011176  | 0.763568  | H | 0 | 0.692432  | 2.142278  | 2.083845  |
| H | 0 | -0.579355 | -0.261717 | -2.511566 | H | 0 | 3.941767  | 2.830864  | 1.063469  |
| H | 0 | 0.017002  | -1.869457 | -2.874921 | H | 0 | 4.393145  | 1.547330  | -0.102223 |
| H | 0 | 3.164232  | -0.009128 | 0.093414  | H | 0 | 4.720361  | 0.683135  | 2.444399  |
| H | 0 | 1.648086  | -0.144332 | -3.622911 | H | 0 | -2.411849 | -2.234921 | -1.822429 |
| H | 0 | 2.017062  | -2.754103 | 0.821225  | H | 0 | -3.976807 | -1.482854 | -2.191984 |
| H | 0 | 2.307455  | -1.420900 | 1.947250  | H | 0 | 2.498652  | 1.175912  | 3.791943  |
| H | 0 | 0.905979  | 1.345078  | -1.207698 | H | 0 | 0.724113  | -0.149332 | 2.149252  |
| H | 0 | 2.542857  | 1.519281  | -1.874411 | H | 0 | -5.045671 | 0.230914  | -2.037534 |
| H | 0 | -0.149533 | -2.772895 | 1.612706  | H | 0 | -5.029361 | 1.532858  | -0.845311 |
| H | 0 | 4.269823  | -1.027539 | -3.427388 | H | 0 | -4.510084 | 1.848350  | -2.506498 |
| H | 0 | 4.219525  | 0.439623  | -2.444312 | H | 0 | -2.315608 | 2.152401  | 0.295939  |
| H | 0 | 4.925647  | -1.038182 | -1.784046 | H | 0 | -1.434958 | 2.343870  | -1.225514 |
| H | 0 | 3.558679  | -3.025584 | -1.200640 | H | 0 | -3.061782 | 2.981808  | -1.062111 |
| H | 0 | 1.834390  | -3.115478 | -1.576840 |   |   |           |           |           |
| H | 0 | 3.016272  | -3.015207 | -2.879266 |   |   |           |           |           |

Energy + ZPE = -1223.258382  
Free energy = -1223.306158  
Free energy in DCM = -1223.654777  
Free energy in heptane = -1223.656010  
Number of imaginary frequencies = 1 (-398.45)

Energy + ZPE = -1223.301406  
Free energy = -1223.346565  
Free energy in DCM = -1223.707571  
Free energy in heptane = -1223.706948  
Number of imaginary frequencies = 0

#### Product 19a+cpReX

#### Product 19a+cpReN

|    |   |           |           |           |
|----|---|-----------|-----------|-----------|
| Cl | 0 | 1.187782  | -2.617538 | -0.375084 |
| B  | 0 | 0.887771  | -0.807913 | 0.014110  |
| C  | 0 | 2.270687  | 0.002038  | 0.108627  |
| C  | 0 | -0.438706 | -0.194864 | -0.649549 |
| C  | 0 | 3.328773  | -0.520835 | 1.146914  |
| C  | 0 | -1.584434 | -0.849771 | 0.160518  |
| C  | 0 | -0.756636 | -0.169708 | -2.160201 |
| C  | 0 | 2.235466  | 1.550429  | 0.440154  |
| C  | 0 | -2.969612 | -0.524675 | -0.438055 |
| C  | 0 | -2.285261 | -0.049048 | -2.402457 |
| C  | 0 | -1.220711 | -0.516449 | 1.599460  |
| C  | 0 | 1.671428  | 1.731888  | 1.846755  |
| C  | 0 | 3.735200  | 1.806276  | 0.735516  |
| C  | 0 | 3.781162  | 0.780281  | 1.894382  |
| C  | 0 | -3.026678 | 0.802698  | -1.298748 |
| C  | 0 | -2.977810 | -1.297700 | -1.793968 |
| C  | 0 | 2.588895  | 1.260119  | 2.712399  |

|    |   |           |           |           |
|----|---|-----------|-----------|-----------|
| Cl | 0 | 0.703825  | -2.787626 | 0.143530  |
| B  | 0 | 0.854202  | -0.983740 | 0.032336  |
| C  | 0 | 2.315998  | -0.429799 | 0.207612  |
| C  | 0 | -0.428437 | -0.149567 | -0.343979 |
| O  | 0 | -0.707329 | -0.346182 | 2.536832  |
| C  | 0 | 2.910522  | -0.668339 | 1.653310  |
| C  | 0 | -1.759006 | -0.598630 | 0.339030  |
| C  | 0 | -0.549175 | -0.012987 | -1.911516 |
| C  | 0 | 2.534898  | 1.124614  | 0.023862  |
| C  | 0 | -1.848672 | 0.002394  | 1.744408  |
| C  | 0 | -2.990667 | -0.343539 | -0.555677 |
| C  | 0 | -2.010662 | 0.074553  | -2.390082 |
| C  | 0 | 3.440888  | 0.749661  | 2.052398  |
| C  | 0 | 2.314253  | 1.633402  | 1.468356  |
| C  | 0 | 4.040940  | 1.314702  | -0.103931 |
| C  | 0 | -2.918395 | 0.949947  | -1.454067 |
| C  | 0 | -2.765949 | -1.169732 | -1.854610 |
| C  | 0 | 4.579703  | 1.086175  | 1.102035  |
| C  | 0 | -4.287316 | 1.238007  | -2.103155 |

|   |   |           |           |           |   |   |           |           |           |
|---|---|-----------|-----------|-----------|---|---|-----------|-----------|-----------|
| C | 0 | -2.406440 | 2.290551  | -0.910008 | H | 0 | 0.767021  | 2.147270  | 0.453169  |
| H | 0 | 2.939638  | -0.972193 | -0.517602 | H | 0 | -2.012901 | 0.065463  | 0.922547  |
| H | 0 | -0.220570 | 0.858466  | 0.029021  | H | 0 | -1.785663 | -1.312555 | -0.199037 |
| H | 0 | -0.705200 | -1.312439 | 2.632893  | H | 0 | 0.517724  | -1.531745 | -1.499877 |
| H | 0 | 3.694027  | -1.430940 | 1.655441  | H | 0 | 1.312031  | 0.010367  | -1.781639 |
| H | 0 | 2.138836  | -0.980538 | 2.364906  | H | 0 | -1.358265 | 2.942644  | -0.959350 |
| H | 0 | -1.735476 | -1.689202 | 0.482963  | H | 0 | -2.822129 | 0.814902  | -1.518255 |
| H | 0 | 0.015629  | 0.871815  | -2.230321 | H | 0 | -1.412431 | -0.911042 | -2.621920 |
| H | 0 | -0.091025 | -0.869938 | -2.424321 | H | 0 | 1.265215  | -0.176656 | -4.097087 |
| H | 0 | 1.930732  | 1.581246  | -0.764252 | H | 0 | 0.499373  | 2.229470  | -2.272597 |
| H | 0 | -2.776682 | -0.322811 | 2.240353  | H | 0 | 0.320404  | 2.167798  | -5.740804 |
| H | 0 | -1.855383 | 1.096354  | 1.715459  | H | 0 | 0.222143  | -1.795027 | -5.396704 |
| H | 0 | -3.922496 | -0.505377 | 0.002902  | H | 0 | -0.790080 | -0.653149 | -6.270398 |
| H | 0 | -2.050601 | 0.282913  | -3.466933 | H | 0 | 2.395670  | 1.825216  | -3.542985 |
| H | 0 | 3.651702  | 0.853389  | 3.119904  | H | 0 | 1.766499  | 3.360969  | -4.224022 |
| H | 0 | 2.514896  | 2.704227  | 1.574340  | H | 0 | 2.769836  | 2.053503  | -6.704525 |
| H | 0 | 1.327587  | 1.392888  | 1.879749  | H | 0 | 1.212161  | -1.545999 | -7.642878 |
| H | 0 | 4.565622  | 1.478395  | -1.040634 | H | 0 | 0.129194  | 1.172738  | -7.642242 |
| H | 0 | -2.184466 | -2.092723 | -1.752327 | H | 0 | 1.565805  | 0.799460  | -8.615751 |
| H | 0 | -3.684007 | -1.394539 | -2.400480 | H | 0 | 4.686505  | 0.107202  | -7.259984 |
| H | 0 | 5.634771  | 1.029423  | 1.352143  | H | 0 | 3.964575  | -1.423574 | -7.773812 |
| H | 0 | -4.773399 | 0.349417  | -2.514414 | H | 0 | 3.461937  | 0.091588  | -8.531152 |
| H | 0 | -4.972806 | 1.676095  | -1.366482 | H | 0 | 3.643649  | -0.100627 | -4.489229 |
| H | 0 | -4.177007 | 1.961898  | -2.920406 | H | 0 | 2.603881  | -1.519926 | -4.664922 |
| H | 0 | -3.080829 | 2.670458  | -0.131525 | H | 0 | 4.172286  | -1.474782 | -5.449945 |
| H | 0 | -1.402285 | 2.254031  | -0.487600 |   |   |           |           |           |
| H | 0 | -2.393501 | 3.039015  | -1.713038 |   |   |           |           |           |

Energy + ZPE = -1223.302205

Free energy = -1223.349666

Free energy in DCM = -1223.705175

Free energy in heptane = -1223.705481

Number of imaginary frequencies = 0

Energy + ZPE = -1223.301566

Free energy = -1223.346652

Free energy in DCM = -1223.707566

Free energy in heptane = -1223.707182

Number of imaginary frequencies = 0

#### Product 19a+cpSiX

#### Product 19a+cpSiN

|    |   |           |           |           |
|----|---|-----------|-----------|-----------|
| C  | 0 | 0.000000  | 0.000000  | 0.000000  |
| C  | 0 | 0.000000  | 1.524461  | 0.000000  |
| C  | 0 | -1.524507 | -0.266241 | 0.000000  |
| C  | 0 | 0.368821  | -0.446812 | -1.457113 |
| C  | 0 | -1.071914 | 1.924915  | -0.709348 |
| C  | 0 | -1.788123 | 0.672761  | -1.202908 |
| C  | 0 | -0.878407 | -0.002750 | -2.305467 |
| B  | 0 | -0.595116 | 0.797814  | -3.669979 |
| C  | 0 | 0.482768  | 0.256309  | -4.731590 |
| O  | 0 | 0.344905  | 2.198738  | -3.240939 |
| Cl | 0 | -2.154249 | 1.510243  | -4.427424 |
| C  | 0 | 1.117588  | 1.543377  | -5.314387 |
| C  | 0 | 0.208525  | -0.788087 | -5.834906 |
| C  | 0 | 1.559872  | 2.298243  | -4.069882 |
| C  | 0 | 2.078831  | 1.229372  | -6.480549 |
| C  | 0 | 1.255420  | -0.675977 | -6.975802 |
| C  | 0 | 2.684108  | -0.233490 | -6.470758 |
| C  | 0 | 1.131501  | 0.731990  | -7.616978 |
| C  | 0 | 3.748843  | -0.365261 | -7.580656 |
| C  | 0 | 3.297704  | -0.864163 | -5.196962 |
| H  | 0 | 0.596556  | -0.475177 | 0.782890  |

|    |   |           |           |           |
|----|---|-----------|-----------|-----------|
| C  | 0 | 0.000000  | 0.000000  | 0.000000  |
| C  | 0 | 0.000000  | 1.523407  | 0.000000  |
| C  | 0 | -1.522189 | -0.271863 | 0.000000  |
| C  | 0 | 0.384980  | -0.426688 | -1.469244 |
| C  | 0 | -1.064495 | 1.928670  | -0.707098 |
| C  | 0 | -1.793161 | 0.681730  | -1.186064 |
| C  | 0 | -0.896099 | 0.020412  | -2.286398 |
| B  | 0 | 0.796243  | -1.915483 | -1.766902 |
| C  | 0 | 1.360482  | -2.353963 | -3.174663 |
| Cl | 0 | 0.765900  | -3.130813 | -0.431469 |
| C  | 0 | 0.989986  | -3.790824 | -3.660049 |
| C  | 0 | 2.908822  | -2.051760 | -3.237637 |
| C  | 0 | 2.111268  | -4.429256 | -4.508577 |
| C  | 0 | 3.676940  | -3.051450 | -4.121763 |
| C  | 0 | -0.389333 | -3.787074 | -4.327008 |
| C  | 0 | 2.906222  | -3.432851 | -5.435513 |
| C  | 0 | 3.373820  | -4.481108 | -3.601937 |
| O  | 0 | -1.403025 | -3.287195 | -3.448654 |
| C  | 0 | 3.808747  | -4.206985 | -6.417201 |
| C  | 0 | 2.196887  | -2.349097 | -6.257573 |
| H  | 0 | 0.591111  | -0.484605 | 0.778980  |
| H  | 0 | 0.796639  | 2.141391  | 0.403826  |
| H  | 0 | -2.008972 | 0.051321  | 0.925418  |

|   |   |           |           |           |
|---|---|-----------|-----------|-----------|
| H | 0 | -1.782672 | -1.315390 | -0.208876 |
| H | 0 | 1.239628  | 0.180339  | -1.808278 |
| H | 0 | -1.315922 | 2.944367  | -0.997088 |
| H | 0 | -2.833988 | 0.815194  | -1.492349 |
| H | 0 | -0.646509 | 0.715631  | -3.093666 |
| H | 0 | -1.415614 | -0.833508 | -2.733159 |
| H | 0 | 0.891342  | -1.661345 | -3.882110 |
| H | 0 | 0.892783  | -4.447043 | -2.781998 |
| H | 0 | 3.364502  | -2.089100 | -2.238049 |
| H | 0 | 3.050064  | -1.025774 | -3.599130 |
| H | 0 | 1.769237  | -5.365750 | -4.969308 |
| H | 0 | 4.726477  | -2.747476 | -4.224450 |
| H | 0 | -0.414469 | -3.125806 | -5.198500 |
| H | 0 | -0.643985 | -4.801611 | -4.672585 |
| H | 0 | 3.198484  | -4.587114 | -2.525612 |
| H | 0 | 4.109618  | -5.226228 | -3.909857 |
| H | 0 | -1.438015 | -3.880714 | -2.681036 |
| H | 0 | 4.547380  | -3.533087 | -6.869261 |
| H | 0 | 4.356060  | -5.031041 | -5.951893 |
| H | 0 | 3.208001  | -4.630553 | -7.232157 |
| H | 0 | 1.553672  | -2.806433 | -7.020454 |
| H | 0 | 1.580351  | -1.669321 | -5.669400 |
| H | 0 | 2.938027  | -1.738173 | -6.789229 |

Energy + ZPE = -1223.302507

Free energy = -1223.350806

Free energy in DCM = -1223.704945

Free energy in heptane = -1223.705414

Number of imaginary frequencies = 0

## Diels-Alder reaction with Vinylborane (20a)

### TS 20a+cpReN

|    |   |           |           |           |
|----|---|-----------|-----------|-----------|
| C  | 0 | -1.836586 | -0.165379 | 0.903077  |
| C  | 0 | -1.836586 | 1.221311  | 0.903077  |
| C  | 0 | -3.266812 | -0.629764 | 0.903077  |
| C  | 0 | -3.951982 | 0.574701  | 0.279495  |
| C  | 0 | -3.125548 | 1.678264  | 0.574421  |
| H  | 0 | -0.994172 | -0.795895 | 1.162119  |
| H  | 0 | -0.965237 | 1.848294  | 1.052008  |
| H  | 0 | -3.600291 | -0.700565 | 1.952750  |
| H  | 0 | -3.460677 | -1.593489 | 0.430188  |
| H  | 0 | -5.035020 | 0.658782  | 0.247918  |
| H  | 0 | -3.400211 | 2.718196  | 0.433696  |
| Cl | 0 | -0.925611 | 1.979763  | -2.343327 |
| B  | 0 | -0.931327 | 0.189364  | -2.022614 |
| C  | 0 | -2.253586 | -0.471861 | -1.676581 |
| C  | 0 | 0.404836  | -0.629422 | -2.278212 |
| C  | 0 | -3.518364 | 0.141320  | -1.651892 |
| C  | 0 | 1.750968  | 0.035433  | -1.834514 |
| C  | 0 | 0.400074  | -1.082721 | -3.795091 |
| C  | 0 | 2.893097  | -0.216828 | -2.840751 |
| C  | 0 | 1.793818  | -1.062348 | -4.444478 |
| C  | 0 | 2.095343  | -0.367718 | -0.399464 |
| C  | 0 | 2.903185  | -1.646981 | -3.505073 |

|   |   |           |           |           |
|---|---|-----------|-----------|-----------|
| C | 0 | 2.413420  | 0.339686  | -4.210619 |
| O | 0 | 3.229347  | 0.380947  | 0.027794  |
| C | 0 | 4.225176  | -1.887083 | -4.259474 |
| C | 0 | 2.615049  | -2.922222 | -2.701661 |
| C | 0 | 3.586504  | 0.159805  | 1.379984  |
| C | 0 | 2.669175  | 0.847938  | 2.377736  |
| C | 0 | 2.175277  | 2.131418  | 2.107877  |
| C | 0 | 2.340553  | 0.239419  | 3.593240  |
| C | 0 | 1.374801  | 2.792743  | 3.039487  |
| C | 0 | 1.544695  | 0.901889  | 4.531014  |
| C | 0 | 1.059104  | 2.180573  | 4.255940  |
| H | 0 | -2.237281 | -1.553396 | -1.531867 |
| H | 0 | 0.297370  | -1.550950 | -1.690609 |
| H | 0 | -4.401411 | -0.482676 | -1.784505 |
| H | 0 | -3.618736 | 1.132165  | -2.085097 |
| H | 0 | 1.619991  | 1.124656  | -1.807810 |
| H | 0 | -0.042755 | -2.084455 | -3.860109 |
| H | 0 | -0.246078 | -0.427810 | -4.395539 |
| H | 0 | 3.842611  | 0.148310  | -2.436039 |
| H | 0 | 1.745824  | -1.447717 | -5.471780 |
| H | 0 | 2.317189  | -1.444455 | -0.323616 |
| H | 0 | 1.235931  | -0.160962 | 0.257554  |
| H | 0 | 1.719189  | 1.186769  | -4.179353 |
| H | 0 | 3.226347  | 0.579903  | -4.899379 |
| H | 0 | 4.539782  | -1.034225 | -4.867124 |
| H | 0 | 5.035020  | -2.100819 | -3.550044 |
| H | 0 | 4.134396  | -2.753577 | -4.927473 |
| H | 0 | 1.665727  | -2.905884 | -2.164792 |
| H | 0 | 2.593236  | -3.789891 | -3.374732 |
| H | 0 | 3.410890  | -3.106406 | -1.968395 |
| H | 0 | 4.604029  | 0.559238  | 1.475868  |
| H | 0 | 3.637964  | -0.919405 | 1.600413  |
| H | 0 | 2.420004  | 2.600219  | 1.158918  |
| H | 0 | 2.711436  | -0.760611 | 3.810168  |
| H | 0 | 1.001552  | 3.789891  | 2.819360  |
| H | 0 | 1.299183  | 0.415729  | 5.471780  |
| H | 0 | 0.437426  | 2.697160  | 4.982439  |

Energy + ZPE = -1493.508717

Free energy = -1493.568781

Free energy in DCM = -1494.010333

Free energy in heptane = -1494.012000

Number of imaginary frequencies = 1 (-405.51)

### TS 20a+cpReX

|   |   |           |           |          |
|---|---|-----------|-----------|----------|
| C | 0 | -2.107428 | 1.131230  | 1.088712 |
| C | 0 | -2.107428 | 2.632375  | 1.088712 |
| C | 0 | -3.432192 | 0.708557  | 1.088712 |
| C | 0 | -3.466214 | 2.918726  | 0.481964 |
| C | 0 | -4.265355 | 1.798414  | 0.775964 |
| H | 0 | -1.237921 | 0.522848  | 1.306152 |
| H | 0 | -2.131808 | 2.972691  | 2.138625 |
| H | 0 | -1.253171 | 3.106280  | 0.606303 |
| H | 0 | -3.765014 | -0.316185 | 1.218949 |
| H | 0 | -3.866637 | 3.926388  | 0.412180 |
| H | 0 | -5.341709 | 1.745581  | 0.645521 |





Energy + ZPE = -1493.508652  
 Free energy = -1493.567807  
 Free energy in DCM = -1494.013304  
 Free energy in heptane = -1494.014200  
 Number of imaginary frequencies = 1 (-401.37)

**TS 20a+cpSiX**

|    |   |           |           |           |
|----|---|-----------|-----------|-----------|
| C  | 0 | -2.227418 | 1.208431  | 3.747646  |
| C  | 0 | -2.227418 | 2.597766  | 3.747646  |
| C  | 0 | -3.653914 | 0.744705  | 3.747646  |
| C  | 0 | -3.522310 | 3.058203  | 3.447915  |
| C  | 0 | -4.347833 | 1.954685  | 3.152451  |
| H  | 0 | -1.383028 | 0.576577  | 3.997069  |
| H  | 0 | -1.353857 | 3.227031  | 3.882301  |
| H  | 0 | -3.983603 | 0.656084  | 4.797365  |
| H  | 0 | -3.843804 | -0.210612 | 3.258861  |
| H  | 0 | -3.803089 | 4.099640  | 3.327781  |
| H  | 0 | -5.431009 | 2.029675  | 3.111700  |
| C  | 0 | -2.541730 | 1.196820  | 1.144407  |
| C  | 0 | -3.901761 | 1.541824  | 1.193431  |
| B  | 0 | -1.921375 | -0.186667 | 1.083463  |
| Cl | 0 | -3.010662 | -1.648847 | 1.161000  |
| C  | 0 | -0.369252 | -0.452160 | 0.884532  |
| C  | 0 | -0.050725 | -1.040745 | -0.544242 |
| C  | 0 | 0.266694  | -1.283498 | 2.060217  |
| C  | 0 | 1.071985  | -2.096477 | -0.501054 |
| C  | 0 | 1.289546  | -2.332487 | 1.594707  |
| C  | 0 | 0.202070  | 0.102152  | -1.530633 |
| C  | 0 | 2.255429  | -1.780718 | 0.491616  |
| C  | 0 | 0.620123  | -3.199599 | 0.497198  |
| O  | 0 | 0.292769  | -0.436438 | -2.845982 |
| C  | 0 | 3.441043  | -2.732980 | 0.240825  |
| C  | 0 | 2.844505  | -0.371468 | 0.637100  |
| C  | 0 | 0.476996  | 0.543202  | -3.852986 |
| C  | 0 | 1.862611  | 1.167114  | -3.869929 |
| C  | 0 | 2.998371  | 0.365626  | -3.691559 |
| C  | 0 | 2.032607  | 2.536174  | -4.098453 |
| C  | 0 | 4.275343  | 0.923445  | -3.743878 |
| C  | 0 | 3.310654  | 3.096885  | -4.160328 |
| C  | 0 | 4.435540  | 2.291470  | -3.981630 |
| H  | 0 | -1.846055 | 2.029556  | 1.034921  |
| H  | 0 | -4.221182 | 2.497696  | 0.786103  |
| H  | 0 | -4.638142 | 0.748971  | 1.076922  |
| H  | 0 | 0.102763  | 0.538512  | 0.916516  |
| H  | 0 | -0.933947 | -1.571259 | -0.925398 |
| H  | 0 | -0.511613 | -1.817284 | 2.620549  |
| H  | 0 | 0.734832  | -0.586214 | 2.768223  |
| H  | 0 | 1.343485  | -2.399538 | -1.517894 |
| H  | 0 | 1.743899  | -2.839784 | 2.456261  |
| H  | 0 | -0.634885 | 0.821008  | -1.486880 |
| H  | 0 | 1.119800  | 0.651004  | -1.278052 |
| H  | 0 | -0.458601 | -3.364659 | 0.590768  |
| H  | 0 | 1.109829  | -4.162934 | 0.339376  |
| H  | 0 | 4.145515  | -2.698588 | 1.082098  |
| H  | 0 | 3.140976  | -3.775815 | 0.104829  |

|   |   |           |           |           |
|---|---|-----------|-----------|-----------|
| H | 0 | 3.989422  | -2.429323 | -0.660249 |
| H | 0 | 3.339642  | -0.060023 | -0.291397 |
| H | 0 | 2.112691  | 0.396524  | 0.892930  |
| H | 0 | 3.608456  | -0.367389 | 1.426365  |
| H | 0 | 0.294316  | 0.015550  | -4.797365 |
| H | 0 | -0.286145 | 1.334704  | -3.766888 |
| H | 0 | 2.869683  | -0.696795 | -3.503996 |
| H | 0 | 1.157896  | 3.170433  | -4.229077 |
| H | 0 | 5.147791  | 0.290432  | -3.602631 |
| H | 0 | 3.425467  | 4.162934  | -4.339351 |
| H | 0 | 5.431009  | 2.725597  | -4.024149 |

Energy + ZPE = -1493.508282  
 Free energy = -1493.567501  
 Free energy in DCM = -1494.012227  
 Free energy in heptane = -1494.013464  
 Number of imaginary frequencies = 1 (-401.87)

**Product 20a+cpReN**

|    |   |           |           |           |
|----|---|-----------|-----------|-----------|
| C  | 0 | -1.386116 | 2.269857  | -1.293928 |
| C  | 0 | -2.418936 | 1.915214  | -0.234308 |
| C  | 0 | -2.018436 | 3.555579  | -1.875285 |
| C  | 0 | -2.215335 | 4.205521  | -0.486820 |
| C  | 0 | -2.911448 | 3.066868  | 0.243769  |
| Cl | 0 | 0.467448  | 1.990626  | 2.165690  |
| B  | 0 | 0.604768  | 1.867262  | 0.380992  |
| C  | 0 | -0.124285 | 2.911425  | -0.540656 |
| C  | 0 | 1.524160  | 0.735886  | -0.230587 |
| C  | 0 | -0.735648 | 4.227284  | 0.037529  |
| C  | 0 | 1.442756  | -0.682482 | 0.427160  |
| C  | 0 | 2.993789  | 1.331980  | -0.286332 |
| C  | 0 | 2.829283  | -1.339064 | 0.579725  |
| C  | 0 | 4.076232  | 0.299042  | 0.068152  |
| C  | 0 | 0.421166  | -1.550657 | -0.312125 |
| C  | 0 | 3.826850  | -1.088551 | -0.615714 |
| C  | 0 | 3.698908  | -0.361351 | 1.419272  |
| O  | 0 | 0.201105  | -2.731924 | 0.449693  |
| C  | 0 | 5.055580  | -2.011332 | -0.502215 |
| C  | 0 | 3.372570  | -1.131995 | -2.080528 |
| C  | 0 | -0.764087 | -3.606795 | -0.108874 |
| C  | 0 | -2.193965 | -3.105914 | 0.011255  |
| C  | 0 | -2.606411 | -2.418617 | 1.160576  |
| C  | 0 | -3.127781 | -3.353539 | -0.999999 |
| C  | 0 | -3.927328 | -1.989840 | 1.293545  |
| C  | 0 | -4.453360 | -2.935061 | -0.864940 |
| C  | 0 | -4.855985 | -2.249703 | 0.281828  |
| H  | 0 | -1.121068 | 1.479599  | -2.000198 |
| H  | 0 | -2.620262 | 0.911347  | 0.127825  |
| H  | 0 | -2.964056 | 3.361084  | -2.391700 |
| H  | 0 | -1.343532 | 4.115399  | -2.534371 |
| H  | 0 | -2.715280 | 5.176862  | -0.454807 |
| H  | 0 | -3.589479 | 3.192270  | 1.082257  |
| H  | 0 | 0.592032  | 3.161958  | -1.339526 |
| H  | 0 | 1.211127  | 0.623254  | -1.276546 |
| H  | 0 | -0.204598 | 5.104938  | -0.349296 |
| H  | 0 | -0.697059 | 4.270559  | 1.128684  |

|   |   |           |           |           |   |   |           |           |           |
|---|---|-----------|-----------|-----------|---|---|-----------|-----------|-----------|
| H | 0 | 1.051910  | -0.582463 | 1.447551  | C | 0 | 5.845598  | -1.911952 | 0.828236  |
| H | 0 | 3.166023  | 1.745201  | -1.287621 | H | 0 | -1.082612 | -2.016635 | -1.116191 |
| H | 0 | 3.108403  | 2.172586  | 0.412747  | H | 0 | -1.995027 | -4.264997 | -0.021213 |
| H | 0 | 2.721767  | -2.370863 | 0.929805  | H | 0 | -1.955577 | -3.000033 | 1.246931  |
| H | 0 | 5.075085  | 0.742842  | -0.036040 | H | 0 | -2.901678 | -2.557158 | -2.983110 |
| H | 0 | 0.772558  | -1.820400 | -1.320972 | H | 0 | -4.490164 | -3.827981 | 0.812142  |
| H | 0 | -0.522370 | -0.994687 | -0.431953 | H | 0 | -4.999709 | -3.675869 | -1.793859 |
| H | 0 | 3.170671  | 0.264889  | 2.146493  | H | 0 | -3.245713 | -0.343051 | -1.043404 |
| H | 0 | 4.542691  | -0.839626 | 1.920599  | H | 0 | -1.074168 | 0.880392  | -1.170225 |
| H | 0 | 5.467594  | -2.065223 | 0.509182  | H | 0 | -5.044527 | -1.247619 | 0.192449  |
| H | 0 | 4.792119  | -3.033055 | -0.803857 | H | 0 | -4.022700 | -1.497641 | 1.613489  |
| H | 0 | 5.857323  | -1.666964 | -1.168209 | H | 0 | 0.505271  | 1.024309  | 1.348172  |
| H | 0 | 2.532961  | -0.473440 | -2.307664 | H | 0 | -2.663252 | 2.472184  | -0.932655 |
| H | 0 | 4.202783  | -0.838502 | -2.736809 | H | 0 | -2.809118 | 2.283379  | 0.804186  |
| H | 0 | 3.083272  | -2.151085 | -2.367364 | H | 0 | 2.386189  | 0.919032  | -0.184717 |
| H | 0 | -0.649109 | -4.545844 | 0.446597  | H | 0 | 1.310011  | 1.057469  | -1.592656 |
| H | 0 | -0.530743 | -3.821038 | -1.165115 | H | 0 | 1.700562  | 3.131853  | 0.679133  |
| H | 0 | -1.880086 | -2.216723 | 1.942914  | H | 0 | -2.027099 | 4.564782  | 0.265485  |
| H | 0 | -2.816445 | -3.877770 | -1.901583 | H | 0 | -0.753847 | 2.827844  | 2.261048  |
| H | 0 | -4.233920 | -1.456406 | 2.189744  | H | 0 | -0.093951 | 4.449646  | 1.956897  |
| H | 0 | -5.167389 | -3.135720 | -1.659546 | H | 0 | 1.570280  | -2.470295 | -1.261884 |
| H | 0 | -5.885256 | -1.917077 | 0.386567  | H | 0 | 2.185349  | -1.105733 | -2.208863 |

Energy + ZPE = -1493.551703

Free energy = -1493.609759

Free energy in DCM = -1494.056435

Free energy in heptane = -1494.059181

Number of imaginary frequencies = 0

**Product 20a+cpReX**

|    |   |           |           |           |
|----|---|-----------|-----------|-----------|
| C  | 0 | -2.116579 | -2.216785 | -0.830997 |
| C  | 0 | -2.361706 | -3.274886 | 0.268063  |
| C  | 0 | -3.039979 | -2.735772 | -1.920796 |
| C  | 0 | -3.900764 | -3.157400 | 0.181605  |
| C  | 0 | -4.099652 | -3.296529 | -1.319338 |
| Cl | 0 | -1.621112 | -0.310957 | 2.358640  |
| B  | 0 | -1.869641 | -0.046281 | 0.594906  |
| C  | 0 | -2.883357 | -0.947407 | -0.201596 |
| C  | 0 | -1.115183 | 1.148083  | -0.107559 |
| C  | 0 | -4.078352 | -1.636737 | 0.529261  |
| C  | 0 | 0.354448  | 1.439332  | 0.343438  |
| C  | 0 | -2.077631 | 2.403751  | -0.007963 |
| C  | 0 | 1.366770  | 0.718320  | -0.545973 |
| C  | 0 | 0.636967  | 2.950763  | 0.474827  |
| C  | 0 | -1.327477 | 3.718792  | 0.256025  |
| O  | 0 | 1.093811  | -0.681807 | -0.488561 |
| C  | 0 | -0.036466 | 3.860995  | -0.622367 |
| C  | 0 | -0.402669 | 3.515341  | 1.483903  |
| C  | 0 | 2.040136  | -1.482227 | -1.183213 |
| C  | 0 | 0.535377  | 5.290404  | -0.573305 |
| C  | 0 | -0.083516 | 3.447366  | -2.098232 |
| C  | 0 | 3.380038  | -1.599232 | -0.478529 |
| C  | 0 | 3.432761  | -1.743872 | 0.914211  |
| C  | 0 | 4.574589  | -1.606485 | -1.205878 |
| C  | 0 | 4.657281  | -1.895604 | 1.563427  |
| C  | 0 | 5.801736  | -1.767931 | -0.558893 |

|   |   |           |           |           |
|---|---|-----------|-----------|-----------|
| H | 0 | -1.082612 | -2.016635 | -1.116191 |
| H | 0 | -1.995027 | -4.264997 | -0.021213 |
| H | 0 | -1.955577 | -3.000033 | 1.246931  |
| H | 0 | -2.901678 | -2.557158 | -2.983110 |
| H | 0 | -4.490164 | -3.827981 | 0.812142  |
| H | 0 | -4.999709 | -3.675869 | -1.793859 |
| H | 0 | -3.245713 | -0.343051 | -1.043404 |
| H | 0 | -1.074168 | 0.880392  | -1.170225 |
| H | 0 | -5.044527 | -1.247619 | 0.192449  |
| H | 0 | -4.022700 | -1.497641 | 1.613489  |
| H | 0 | 0.505271  | 1.024309  | 1.348172  |
| H | 0 | -2.663252 | 2.472184  | -0.932655 |
| H | 0 | -2.809118 | 2.283379  | 0.804186  |
| H | 0 | 2.386189  | 0.919032  | -0.184717 |
| H | 0 | 1.310011  | 1.057469  | -1.592656 |
| H | 0 | 1.700562  | 3.131853  | 0.679133  |
| H | 0 | -2.027099 | 4.564782  | 0.265485  |
| H | 0 | -0.753847 | 2.827844  | 2.261048  |
| H | 0 | -0.093951 | 4.449646  | 1.956897  |
| H | 0 | 1.570280  | -2.470295 | -1.261884 |
| H | 0 | 2.185349  | -1.105733 | -2.208863 |
| H | 0 | 0.621403  | 5.689750  | 0.440975  |
| H | 0 | 1.536447  | 5.316058  | -1.022575 |
| H | 0 | -0.100282 | 5.977520  | -1.146209 |
| H | 0 | -0.528986 | 2.466634  | -2.270683 |
| H | 0 | -0.669337 | 4.177559  | -2.672162 |
| H | 0 | 0.925439  | 3.436764  | -2.530562 |
| H | 0 | 2.506652  | -1.725178 | 1.482022  |
| H | 0 | 4.545984  | -1.484943 | -2.287050 |
| H | 0 | 4.685172  | -2.003431 | 2.644719  |
| H | 0 | 6.721856  | -1.772039 | -1.137563 |
| H | 0 | 6.799521  | -2.032432 | 1.334865  |

Energy + ZPE = -1493.554210

Free energy = -1493.612567

Free energy in DCM = -1494.059556

Free energy in heptane = -1494.063105

Number of imaginary frequencies = 0

**Product 20a+cpSiN**

|    |   |           |           |           |
|----|---|-----------|-----------|-----------|
| C  | 0 | -5.236459 | -2.111344 | -0.419062 |
| C  | 0 | -5.605459 | -0.697428 | -0.844194 |
| C  | 0 | -4.278375 | -2.500107 | -1.568050 |
| C  | 0 | -4.533652 | -0.163101 | -1.446673 |
| C  | 0 | -3.431690 | -1.213669 | -1.430847 |
| C  | 0 | -4.222297 | -1.961953 | 0.768412  |
| C  | 0 | -2.953319 | -1.358283 | 0.086652  |
| B  | 0 | -2.257686 | -0.060985 | 0.642498  |
| Cl | 0 | -2.916203 | 0.752308  | 2.100982  |
| C  | 0 | -0.982916 | 0.575492  | -0.046031 |
| C  | 0 | 0.252462  | 0.761513  | 0.912558  |
| C  | 0 | -1.398977 | 1.897722  | -0.809239 |
| C  | 0 | 0.983936  | 2.095026  | 0.665703  |
| C  | 0 | -0.369765 | 3.031223  | -0.670444 |
| C  | 0 | 1.158587  | -0.471050 | 0.834183  |

|   |   |           |           |           |    |   |           |           |           |
|---|---|-----------|-----------|-----------|----|---|-----------|-----------|-----------|
| C | 0 | 1.102980  | 2.528188  | -0.845394 | C  | 0 | 5.077403  | -2.050330 | -0.161067 |
| C | 0 | -0.066379 | 3.228554  | 0.837076  | C  | 0 | 2.848317  | -1.009842 | -0.033628 |
| O | 0 | 2.155811  | -0.369772 | 1.842832  | C  | 0 | 3.823588  | -1.698741 | -1.037997 |
| C | 0 | 2.092800  | 3.699741  | -0.995995 | B  | 0 | 2.299067  | 0.437102  | -0.309264 |
| C | 0 | 1.432414  | 1.525393  | -1.958926 | Cl | 0 | 3.218110  | 1.552747  | -1.381848 |
| C | 0 | 3.035938  | -1.480962 | 1.892311  | C  | 0 | 0.959467  | 0.973611  | 0.338425  |
| C | 0 | 4.015075  | -1.551351 | 0.732871  | C  | 0 | -0.190933 | 0.935388  | -0.754977 |
| C | 0 | 4.666978  | -0.392019 | 0.290612  | C  | 0 | 1.090656  | 2.359034  | 1.072381  |
| C | 0 | 4.309100  | -2.769192 | 0.111776  | C  | 0 | -1.106496 | 2.171507  | -0.664423 |
| C | 0 | 5.594523  | -0.452908 | -0.748775 | C  | 0 | -0.052526 | 3.337164  | 0.757905  |
| C | 0 | 5.244402  | -2.835258 | -0.923908 | C  | 0 | -0.943123 | -0.397619 | -0.694464 |
| C | 0 | 5.888252  | -1.676350 | -1.357704 | C  | 0 | -1.456090 | 2.643681  | 0.797979  |
| H | 0 | -6.070804 | -2.786371 | -0.213039 | C  | 0 | -0.200832 | 3.429177  | -0.782687 |
| H | 0 | -6.532086 | -0.194636 | -0.585280 | O  | 0 | -1.825550 | -0.467765 | -1.808096 |
| H | 0 | -4.782406 | -2.570508 | -2.537398 | C  | 0 | -2.605203 | 3.669527  | 0.773593  |
| H | 0 | -3.711222 | -3.419433 | -1.377167 | C  | 0 | -1.771533 | 1.649106  | 1.922608  |
| H | 0 | -4.409375 | 0.861565  | -1.783396 | C  | 0 | -2.552062 | -1.684299 | -1.888075 |
| H | 0 | -2.614563 | -1.073932 | -2.142366 | C  | 0 | -3.628480 | -1.837267 | -0.827414 |
| H | 0 | -4.001904 | -2.941644 | 1.208114  | C  | 0 | -4.485755 | -0.767475 | -0.534587 |
| H | 0 | -4.620796 | -1.326422 | 1.562752  | C  | 0 | -3.804211 | -3.047404 | -0.149285 |
| H | 0 | -2.151572 | -2.117316 | 0.073238  | C  | 0 | -5.496728 | -0.908565 | 0.415169  |
| H | 0 | -0.668228 | -0.135939 | -0.819857 | C  | 0 | -4.821894 | -3.195184 | 0.796410  |
| H | 0 | -0.096252 | 0.807707  | 1.952277  | C  | 0 | -5.669478 | -2.124898 | 1.082071  |
| H | 0 | -1.559661 | 1.653539  | -1.866744 | H  | 0 | 3.395681  | -0.299247 | 2.082120  |
| H | 0 | -2.356887 | 2.282132  | -0.434639 | H  | 0 | 3.238524  | -2.907921 | 2.533382  |
| H | 0 | 1.896203  | 2.140193  | 1.269418  | H  | 0 | 5.925391  | -0.856111 | 1.498595  |
| H | 0 | -0.680598 | 3.903777  | -1.259960 | H  | 0 | 5.261083  | 0.141311  | 0.166877  |
| H | 0 | 0.560568  | -1.385445 | 1.001936  | H  | 0 | 4.833992  | -4.145863 | 0.802463  |
| H | 0 | 1.622366  | -0.563706 | -0.157442 | H  | 0 | 5.968587  | -2.301150 | -0.741614 |
| H | 0 | -0.887650 | 3.036568  | 1.535828  | H  | 0 | 1.978447  | -1.649372 | 0.162786  |
| H | 0 | 0.371290  | 4.201133  | 1.071125  | H  | 0 | 3.379583  | -2.588937 | -1.494486 |
| H | 0 | 3.125725  | 3.336756  | -0.919358 | H  | 0 | 4.115073  | -1.020465 | -1.845712 |
| H | 0 | 1.981708  | 4.172039  | -1.980601 | H  | 0 | 0.673310  | 0.236290  | 1.099620  |
| H | 0 | 1.963386  | 4.479201  | -0.239915 | H  | 0 | 0.251814  | 0.978273  | -1.760608 |
| H | 0 | 2.448080  | 1.128848  | -1.835923 | H  | 0 | 2.030015  | 2.852599  | 0.796881  |
| H | 0 | 0.751785  | 0.673968  | -2.013971 | H  | 0 | 1.144522  | 2.175956  | 2.153224  |
| H | 0 | 1.399347  | 2.029222  | -2.934208 | H  | 0 | -1.940422 | 2.065197  | -1.365991 |
| H | 0 | 3.581392  | -1.365379 | 2.836841  | H  | 0 | 0.068113  | 4.267422  | 1.328095  |
| H | 0 | 2.465236  | -2.422391 | 1.955813  | H  | 0 | -0.228072 | -1.237418 | -0.742639 |
| H | 0 | 4.434937  | 0.557650  | 0.764850  | H  | 0 | -1.501275 | -0.497360 | 0.245930  |
| H | 0 | 3.802840  | -3.674751 | 0.440480  | H  | 0 | 0.714648  | 3.323484  | -1.374239 |
| H | 0 | 6.092719  | 0.453836  | -1.082470 | H  | 0 | -0.733417 | 4.321078  | -1.119313 |
| H | 0 | 5.462202  | -3.789932 | -1.395792 | H  | 0 | -2.675499 | 4.189495  | 1.737661  |
| H | 0 | 6.612661  | -1.723712 | -2.166468 | H  | 0 | -2.492753 | 4.430650  | -0.003744 |

Energy + ZPE = -1493.550551

Free energy = -1493.608531

Free energy in DCM = -1494.058039

Free energy in heptane = -1494.060282

Number of imaginary frequencies = 0

**Product 20a+cpSiX**

|   |   |          |           |          |
|---|---|----------|-----------|----------|
| C | 0 | 3.733464 | -1.001611 | 1.315756 |
| C | 0 | 3.825513 | -2.459001 | 1.737830 |
| C | 0 | 5.147611 | -0.789896 | 0.731399 |
| C | 0 | 4.627408 | -3.081589 | 0.861470 |

Energy + ZPE = -1493.550382

Free energy = -1493.608167

|    |   |           |           |           |
|----|---|-----------|-----------|-----------|
| C  | 0 | 5.077403  | -2.050330 | -0.161067 |
| C  | 0 | 2.848317  | -1.009842 | -0.033628 |
| C  | 0 | 3.823588  | -1.698741 | -1.037997 |
| B  | 0 | 2.299067  | 0.437102  | -0.309264 |
| Cl | 0 | 3.218110  | 1.552747  | -1.381848 |
| C  | 0 | 0.959467  | 0.973611  | 0.338425  |
| C  | 0 | -0.190933 | 0.935388  | -0.754977 |
| C  | 0 | 1.090656  | 2.359034  | 1.072381  |
| C  | 0 | -1.106496 | 2.171507  | -0.664423 |
| C  | 0 | -0.052526 | 3.337164  | 0.757905  |
| C  | 0 | -0.943123 | -0.397619 | -0.694464 |
| C  | 0 | -1.456090 | 2.643681  | 0.797979  |
| C  | 0 | -0.200832 | 3.429177  | -0.782687 |
| O  | 0 | -1.825550 | -0.467765 | -1.808096 |
| C  | 0 | -2.605203 | 3.669527  | 0.773593  |
| C  | 0 | -1.771533 | 1.649106  | 1.922608  |
| C  | 0 | -2.552062 | -1.684299 | -1.888075 |
| C  | 0 | -3.628480 | -1.837267 | -0.827414 |
| C  | 0 | -4.485755 | -0.767475 | -0.534587 |
| C  | 0 | -3.804211 | -3.047404 | -0.149285 |
| C  | 0 | -5.496728 | -0.908565 | 0.415169  |
| C  | 0 | -4.821894 | -3.195184 | 0.796410  |
| C  | 0 | -5.669478 | -2.124898 | 1.082071  |
| H  | 0 | 3.395681  | -0.299247 | 2.082120  |
| H  | 0 | 3.238524  | -2.907921 | 2.533382  |
| H  | 0 | 5.925391  | -0.856111 | 1.498595  |
| H  | 0 | 5.261083  | 0.141311  | 0.166877  |
| H  | 0 | 4.833992  | -4.145863 | 0.802463  |
| H  | 0 | 5.968587  | -2.301150 | -0.741614 |
| H  | 0 | 1.978447  | -1.649372 | 0.162786  |
| H  | 0 | 3.379583  | -2.588937 | -1.494486 |
| H  | 0 | 4.115073  | -1.020465 | -1.845712 |
| H  | 0 | 0.673310  | 0.236290  | 1.099620  |
| H  | 0 | 0.251814  | 0.978273  | -1.760608 |
| H  | 0 | 2.030015  | 2.852599  | 0.796881  |
| H  | 0 | 1.144522  | 2.175956  | 2.153224  |
| H  | 0 | -1.940422 | 2.065197  | -1.365991 |
| H  | 0 | 0.068113  | 4.267422  | 1.328095  |
| H  | 0 | -0.228072 | -1.237418 | -0.742639 |
| H  | 0 | -1.501275 | -0.497360 | 0.245930  |
| H  | 0 | 0.714648  | 3.323484  | -1.374239 |
| H  | 0 | -0.733417 | 4.321078  | -1.119313 |
| H  | 0 | -2.675499 | 4.189495  | 1.737661  |
| H  | 0 | -2.492753 | 4.430650  | -0.003744 |
| H  | 0 | -3.563770 | 3.163367  | 0.601442  |
| H  | 0 | -2.701232 | 1.105551  | 1.712353  |
| H  | 0 | -0.989160 | 0.908818  | 2.099354  |
| H  | 0 | -1.921092 | 2.191067  | 2.866012  |
| H  | 0 | -3.006627 | -1.673651 | -2.886075 |
| H  | 0 | -1.865133 | -2.546001 | -1.848459 |
| H  | 0 | -4.348698 | 0.177334  | -1.053544 |
| H  | 0 | -3.139669 | -3.882453 | -0.362138 |
| H  | 0 | -6.154432 | -0.070955 | 0.633189  |
| H  | 0 | -4.945656 | -4.142842 | 1.314179  |
| H  | 0 | -6.459168 | -2.235093 | 1.820550  |

Free energy in DCM = -1494.057252  
 Free energy in heptane = -1494.060024  
 Number of imaginary frequencies = 0

Free energy in DCM = -1159.224071  
 Free energy in heptane = -1159.220745  
 Number of imaginary frequencies = 1 (-393.94)

### Diels-Alder reaction with Vinylborane (21a)

#### TS 21a+cpReN

|    |   |           |           |           |
|----|---|-----------|-----------|-----------|
| C  | 0 | -1.918278 | 0.930792  | 2.021681  |
| C  | 0 | -1.918278 | 2.317049  | 2.021681  |
| C  | 0 | -3.348374 | 0.465504  | 2.021681  |
| C  | 0 | -3.209281 | 2.775773  | 1.700699  |
| C  | 0 | -4.038140 | 1.673143  | 1.409269  |
| H  | 0 | -1.075595 | 0.296318  | 2.269714  |
| H  | 0 | -1.048184 | 2.949082  | 2.156620  |
| H  | 0 | -3.679624 | 0.386701  | 3.071501  |
| H  | 0 | -3.541202 | -0.495715 | 1.543825  |
| H  | 0 | -3.484075 | 3.816232  | 1.565565  |
| H  | 0 | -5.121183 | 1.757714  | 1.387212  |
| C  | 0 | -3.625954 | 1.270561  | -0.530629 |
| C  | 0 | -2.373180 | 0.631365  | -0.575252 |
| B  | 0 | -1.042259 | 1.286564  | -0.885032 |
| Cl | 0 | -1.028303 | 3.084392  | -1.179209 |
| C  | 0 | 0.350268  | 0.555624  | -1.128592 |
| C  | 0 | 0.326463  | -1.001215 | -0.880950 |
| C  | 0 | 1.578474  | 1.280659  | -0.460488 |
| C  | 0 | 1.677693  | -1.524130 | -0.354081 |
| C  | 0 | 2.665553  | 0.313358  | 0.032857  |
| C  | 0 | -0.174211 | -1.673326 | -2.156590 |
| C  | 0 | 2.954710  | -0.845251 | -0.982929 |
| C  | 0 | 1.989333  | -0.737531 | 0.949153  |
| I  | 0 | -0.729054 | -3.816232 | -1.891985 |
| C  | 0 | 4.226224  | -1.631350 | -0.607781 |
| C  | 0 | 3.055049  | -0.530292 | -2.481536 |
| H  | 0 | -4.520106 | 0.663874  | -0.668185 |
| H  | 0 | -3.710926 | 2.270350  | -0.945951 |
| H  | 0 | -2.389444 | -0.449912 | -0.441385 |
| H  | 0 | 0.489362  | 0.690256  | -2.213069 |
| H  | 0 | -0.402605 | -1.220821 | -0.091644 |
| H  | 0 | 1.995017  | 2.000596  | -1.173714 |
| H  | 0 | 1.248031  | 1.874133  | 0.401790  |
| H  | 0 | 1.675616  | -2.618488 | -0.302570 |
| H  | 0 | 3.528994  | 0.866561  | 0.424453  |
| H  | 0 | 0.563112  | -1.693338 | -2.957691 |
| H  | 0 | -1.100847 | -1.226900 | -2.516463 |
| H  | 0 | 1.127472  | -0.395573 | 1.535258  |
| H  | 0 | 2.679492  | -1.253631 | 1.619241  |
| H  | 0 | 4.266896  | -1.916321 | 0.447209  |
| H  | 0 | 4.294057  | -2.552777 | -1.199849 |
| H  | 0 | 5.121183  | -1.033658 | -0.822940 |
| H  | 0 | 3.084734  | -1.455773 | -3.071501 |
| H  | 0 | 2.240794  | 0.085169  | -2.866350 |
| H  | 0 | 3.990176  | 0.007376  | -2.686123 |

Energy + ZPE = -1158.831822  
 Free energy = -1158.882944

#### TS 21a+cpReX

|    |   |           |           |           |
|----|---|-----------|-----------|-----------|
| Cl | 0 | 0.922025  | -3.329490 | -0.612926 |
| B  | 0 | 0.922025  | -1.503200 | -0.612926 |
| C  | 0 | 2.251788  | -0.777672 | -0.612926 |
| C  | 0 | -0.522126 | -0.848993 | -0.742900 |
| C  | 0 | 3.534959  | -1.343320 | -0.708937 |
| C  | 0 | -0.537420 | 0.727704  | -0.785510 |
| C  | 0 | -1.577269 | -1.463256 | 0.254805  |
| C  | 0 | -1.798711 | 1.311275  | -0.118225 |
| C  | 0 | -2.604181 | -0.441679 | 0.764515  |
| C  | 0 | -0.311180 | 1.157647  | -2.232330 |
| C  | 0 | -3.130171 | 0.505516  | -0.368755 |
| C  | 0 | -1.828635 | 0.771316  | 1.338269  |
| I  | 0 | 0.126425  | 3.329490  | -2.479111 |
| C  | 0 | -4.351665 | 1.326041  | 0.090007  |
| C  | 0 | -3.482697 | -0.081721 | -1.742040 |
| H  | 0 | 2.221042  | 0.309967  | -0.659106 |
| H  | 0 | -0.840094 | -1.184794 | -1.742420 |
| H  | 0 | 4.332974  | -0.763658 | -1.165784 |
| H  | 0 | 3.612417  | -2.413374 | -0.891228 |
| H  | 0 | 0.308193  | 1.105624  | -0.198510 |
| H  | 0 | -2.079267 | -2.304855 | -0.234982 |
| H  | 0 | -1.072428 | -1.889292 | 1.131632  |
| H  | 0 | -1.844672 | 2.396453  | -0.261233 |
| H  | 0 | -3.353399 | -0.929260 | 1.401566  |
| H  | 0 | -1.174237 | 0.993522  | -2.875648 |
| H  | 0 | 0.569274  | 0.683867  | -2.665946 |
| H  | 0 | -0.857513 | 0.561649  | 1.803711  |
| H  | 0 | -2.412835 | 1.388438  | 2.023419  |
| H  | 0 | -4.215749 | 1.800614  | 1.065800  |
| H  | 0 | -4.569906 | 2.121262  | -0.634008 |
| H  | 0 | -5.240048 | 0.684965  | 0.155183  |
| H  | 0 | -3.666315 | 0.718824  | -2.470540 |
| H  | 0 | -2.721453 | -0.743277 | -2.157981 |
| H  | 0 | -4.410512 | -0.664172 | -1.669077 |
| C  | 0 | 4.331520  | -1.393297 | 1.170846  |
| C  | 0 | 4.395078  | -0.032610 | 1.532611  |
| C  | 0 | 3.110136  | -1.955114 | 1.873738  |
| C  | 0 | 3.133235  | 0.381515  | 1.999746  |
| C  | 0 | 2.283526  | -0.715459 | 2.042237  |
| H  | 0 | 5.220922  | -1.994661 | 1.004132  |
| H  | 0 | 5.240048  | 0.623948  | 1.352090  |
| H  | 0 | 3.429076  | -2.291143 | 2.875648  |
| H  | 0 | 2.614923  | -2.793876 | 1.385021  |
| H  | 0 | 2.852034  | 1.405631  | 2.220828  |
| H  | 0 | 1.263066  | -0.710523 | 2.407092  |

Energy + ZPE = -1158.831670  
 Free energy = -1158.883076  
 Free energy in DCM = -1159.223434  
 Free energy in heptane = -1159.220291  
 Number of imaginary frequencies = 1 (-398.47)

**TS 21a+cpSiN**

|    |   |           |           |           |
|----|---|-----------|-----------|-----------|
| C  | 0 | 2.448615  | -1.252395 | 3.716462  |
| C  | 0 | 2.448615  | 0.157033  | 3.716462  |
| C  | 0 | 0.986100  | -1.664557 | 3.716462  |
| C  | 0 | 1.195018  | 0.623664  | 3.279680  |
| C  | 0 | 0.357270  | -0.461191 | 3.068077  |
| H  | 0 | 3.203050  | -1.829467 | 4.243938  |
| H  | 0 | 3.317864  | 0.781339  | 3.892642  |
| H  | 0 | 0.648064  | -1.699892 | 4.766483  |
| H  | 0 | 0.757285  | -2.630527 | 3.264736  |
| H  | 0 | 0.958136  | 1.657366  | 3.056348  |
| H  | 0 | -0.681533 | -0.409053 | 2.763507  |
| C  | 0 | 2.857164  | -1.727119 | 1.779561  |
| C  | 0 | 1.682501  | -1.495275 | 1.043748  |
| B  | 0 | 1.344462  | -0.255574 | 0.240364  |
| Cl | 0 | 2.548925  | 1.107559  | 0.210720  |
| C  | 0 | 0.056545  | -0.117059 | -0.680712 |
| C  | 0 | 0.457996  | -0.377572 | -2.198510 |
| C  | 0 | -0.769069 | 1.203139  | -0.467000 |
| C  | 0 | -0.299636 | 0.558497  | -3.158759 |
| C  | 0 | -1.240392 | 1.860666  | -1.773720 |
| C  | 0 | 0.297963  | -1.870959 | -2.468876 |
| C  | 0 | -1.811023 | 0.818318  | -2.794955 |
| C  | 0 | -0.007926 | 2.015270  | -2.701144 |
| I  | 0 | 1.162072  | -2.546501 | -4.407648 |
| C  | 0 | -2.540791 | 1.501592  | -3.967080 |
| C  | 0 | -2.729564 | -0.302573 | -2.289661 |
| H  | 0 | 3.132617  | -2.754496 | 2.013813  |
| H  | 0 | 3.709067  | -1.075242 | 1.610535  |
| H  | 0 | 0.964457  | -2.316280 | 1.008669  |
| H  | 0 | -0.601627 | -0.947809 | -0.394337 |
| H  | 0 | 1.521257  | -0.138717 | -2.327125 |
| H  | 0 | -1.630368 | 0.976118  | 0.175361  |
| H  | 0 | -0.166893 | 1.944231  | 0.072597  |
| H  | 0 | -0.081416 | 0.296001  | -4.199921 |
| H  | 0 | -1.851809 | 2.747975  | -1.563962 |
| H  | 0 | 0.839181  | -2.474068 | -1.740181 |
| H  | 0 | -0.739475 | -2.195683 | -2.522279 |
| H  | 0 | 0.955622  | 2.194712  | -2.212665 |
| H  | 0 | -0.142578 | 2.754496  | -3.493242 |
| H  | 0 | -2.741652 | 0.777078  | -4.766483 |
| H  | 0 | -3.506499 | 1.903293  | -3.634066 |
| H  | 0 | -1.975022 | 2.327154  | -4.407701 |
| H  | 0 | -2.906917 | -1.045659 | -3.078114 |
| H  | 0 | -2.349710 | -0.829954 | -1.412852 |
| H  | 0 | -3.709067 | 0.113164  | -2.018110 |

Energy + ZPE = -1158.832248

Free energy = -1158.883686

Free energy in DCM = -1159.224911

Free energy in heptane = -1159.221371

Number of imaginary frequencies = 1 (-396.52)

**TS 21a+cpSiX**

|    |   |           |           |           |
|----|---|-----------|-----------|-----------|
| C  | 0 | -1.534955 | 1.191533  | 3.242848  |
| C  | 0 | -1.534955 | 2.580203  | 3.242848  |
| C  | 0 | -2.960398 | 0.725211  | 3.242848  |
| C  | 0 | -2.832858 | 3.040444  | 2.950164  |
| C  | 0 | -3.660353 | 1.937835  | 2.659360  |
| H  | 0 | -0.688256 | 0.559346  | 3.483959  |
| H  | 0 | -0.661742 | 3.210387  | 3.374568  |
| H  | 0 | -3.287398 | 0.626169  | 4.292475  |
| H  | 0 | -3.148750 | -0.226279 | 2.746296  |
| H  | 0 | -3.115036 | 4.081995  | 2.835010  |
| H  | 0 | -4.743727 | 2.012364  | 2.626913  |
| Cl | 0 | -2.334563 | -1.653254 | 0.647717  |
| B  | 0 | -1.259142 | -0.186840 | 0.537505  |
| C  | 0 | -1.875580 | 1.194623  | 0.623394  |
| C  | 0 | 0.281828  | -0.440130 | 0.242078  |
| C  | 0 | -3.235576 | 1.537369  | 0.693404  |
| C  | 0 | 0.479725  | -0.856937 | -1.281344 |
| C  | 0 | 0.992675  | -1.409243 | 1.255739  |
| C  | 0 | 1.567670  | -1.935127 | -1.441999 |
| C  | 0 | 1.941785  | -2.417845 | 0.589520  |
| C  | 0 | 0.693422  | 0.423187  | -2.084358 |
| C  | 0 | 2.833094  | -1.759453 | -0.518586 |
| C  | 0 | 1.158540  | -3.133605 | -0.540416 |
| I  | 0 | 0.618777  | 0.139687  | -4.292475 |
| C  | 0 | 3.969723  | -2.694005 | -0.974307 |
| C  | 0 | 3.462100  | -0.384611 | -0.257355 |
| H  | 0 | -1.182534 | 2.029840  | 0.514855  |
| H  | 0 | 0.765943  | 0.538638  | 0.354716  |
| H  | 0 | -3.561813 | 2.495440  | 0.297090  |
| H  | 0 | -3.971960 | 0.743869  | 0.581207  |
| H  | 0 | -0.448607 | -1.315745 | -1.644534 |
| H  | 0 | 0.247666  | -1.985691 | 1.817920  |
| H  | 0 | 1.537943  | -0.803661 | 1.991930  |
| H  | 0 | 1.755002  | -2.133569 | -2.503074 |
| H  | 0 | 2.448217  | -3.032304 | 1.345216  |
| H  | 0 | -0.099666 | 1.149196  | -1.906427 |
| H  | 0 | 1.663968  | 0.886653  | -1.916705 |
| H  | 0 | 0.086071  | -3.283214 | -0.376862 |
| H  | 0 | 1.602135  | -4.081995 | -0.850310 |
| H  | 0 | 4.743727  | -2.761229 | -0.198917 |
| H  | 0 | 3.632962  | -3.711017 | -1.193274 |
| H  | 0 | 4.444615  | -2.302352 | -1.882868 |
| H  | 0 | 3.904807  | 0.021544  | -1.176175 |
| H  | 0 | 2.763661  | 0.357009  | 0.133845  |
| H  | 0 | 4.276329  | -0.480044 | 0.473316  |

Energy + ZPE = -1158.832170

Free energy = -1158.884040

Free energy in DCM = -1159.224016

Free energy in heptane = -1159.220738

Number of imaginary frequencies = 1 (-395.45)

**Product 21a+cpReN**

|   |   |           |          |          |
|---|---|-----------|----------|----------|
| C | 0 | -1.749479 | 1.369039 | 2.139626 |
|---|---|-----------|----------|----------|

|    |   |           |           |           |    |   |           |           |           |
|----|---|-----------|-----------|-----------|----|---|-----------|-----------|-----------|
| C  | 0 | -1.668948 | 2.825130  | 2.569007  | C  | 0 | 0.559998  | -0.441191 | 3.107408  |
| C  | 0 | -3.194723 | 1.032656  | 2.575868  | Cl | 0 | 0.162923  | -3.629371 | 1.233136  |
| C  | 0 | -2.889308 | 3.357856  | 2.412857  | B  | 0 | 0.282918  | -1.856965 | 0.932813  |
| C  | 0 | -3.801155 | 2.267205  | 1.872273  | C  | 0 | 1.290081  | -0.998963 | 1.777029  |
| C  | 0 | -3.350531 | 2.011901  | 0.389969  | C  | 0 | -0.701756 | -1.314860 | -0.185318 |
| C  | 0 | -1.945665 | 1.341485  | 0.543343  | C  | 0 | 2.568081  | -1.661201 | 2.384982  |
| B  | 0 | -0.696530 | 1.905777  | -0.223203 | C  | 0 | -0.541986 | 0.205221  | -0.570679 |
| Cl | 0 | -0.733561 | 3.587058  | -0.855977 | C  | 0 | -2.198107 | -1.748356 | 0.083958  |
| C  | 0 | 0.660918  | 1.131467  | -0.497509 | C  | 0 | -1.891504 | 0.846387  | -0.950650 |
| C  | 0 | 0.646913  | -0.417173 | -0.207922 | C  | 0 | -3.223272 | -0.702137 | -0.376069 |
| C  | 0 | 1.880153  | 1.891499  | 0.167986  | C  | 0 | 0.542770  | 0.300708  | -1.642422 |
| C  | 0 | 1.997273  | -0.911294 | 0.348137  | C  | 0 | -2.871176 | -0.078323 | -1.770213 |
| C  | 0 | 2.966318  | 0.943498  | 0.698246  | C  | 0 | -2.841403 | 0.656758  | 0.264744  |
| C  | 0 | 0.167235  | -1.123604 | -1.474579 | I  | 0 | 1.227508  | 2.372609  | -2.069401 |
| C  | 0 | 3.275276  | -0.237868 | -0.284493 | C  | 0 | -4.040418 | 0.748374  | -2.340473 |
| C  | 0 | 2.286061  | -0.087164 | 1.633582  | C  | 0 | -2.379752 | -0.988741 | -2.904231 |
| I  | 0 | -0.324937 | -3.272714 | -1.185099 | H  | 0 | 3.132810  | -1.938039 | 4.541094  |
| C  | 0 | 4.548407  | -1.003786 | 0.125256  | H  | 0 | 3.457009  | 0.698190  | 4.396378  |
| C  | 0 | 3.391006  | 0.039977  | -1.789491 | H  | 0 | 0.621330  | -1.277121 | 5.144938  |
| H  | 0 | -0.954929 | 0.709716  | 2.495973  | H  | 0 | 0.586775  | -2.534598 | 3.869250  |
| H  | 0 | -0.754316 | 3.345588  | 2.835685  | H  | 0 | 1.216829  | 1.755643  | 3.428800  |
| H  | 0 | -3.318785 | 1.059666  | 3.663176  | H  | 0 | -0.502982 | -0.215359 | 2.989858  |
| H  | 0 | -3.558082 | 0.075085  | 2.184038  | H  | 0 | 1.570104  | -0.123345 | 1.181231  |
| H  | 0 | -3.168439 | 4.400867  | 2.523730  | H  | 0 | -0.392786 | -1.891425 | -1.070499 |
| H  | 0 | -4.874892 | 2.432819  | 1.989131  | H  | 0 | 3.483843  | -1.256544 | 1.943006  |
| H  | 0 | -4.047784 | 1.330195  | -0.110722 | H  | 0 | 2.573921  | -2.744825 | 2.233296  |
| H  | 0 | -3.322030 | 2.940182  | -0.185433 | H  | 0 | -0.184826 | 0.761767  | 0.304206  |
| H  | 0 | -2.033179 | 0.276342  | 0.286667  | H  | 0 | -2.376470 | -2.712379 | -0.404140 |
| H  | 0 | 0.809559  | 1.246651  | -1.580364 | H  | 0 | -2.363486 | -1.921442 | 1.155241  |
| H  | 0 | -0.089342 | -0.628405 | 0.576052  | H  | 0 | -1.740582 | 1.863233  | -1.328406 |
| H  | 0 | 2.292392  | 2.594193  | -0.563830 | H  | 0 | -4.244758 | -1.077097 | -0.233406 |
| H  | 0 | 1.541330  | 2.505418  | 1.013368  | H  | 0 | 0.222206  | -0.075476 | -2.612667 |
| H  | 0 | 2.004480  | -2.003462 | 0.429789  | H  | 0 | 1.462424  | -0.202144 | -1.341882 |
| H  | 0 | 3.819463  | 1.515576  | 1.084702  | H  | 0 | -2.372499 | 0.620585  | 1.255889  |
| H  | 0 | 0.905367  | -1.127860 | -2.275259 | H  | 0 | -3.661048 | 1.376565  | 0.298121  |
| H  | 0 | -0.770150 | -0.707832 | -1.845915 | H  | 0 | -4.466480 | 1.453322  | -1.621405 |
| H  | 0 | 1.416265  | 0.262207  | 2.202879  | H  | 0 | -3.707464 | 1.328468  | -3.210281 |
| H  | 0 | 2.973082  | -0.579635 | 2.323913  | H  | 0 | -4.849480 | 0.086482  | -2.674449 |
| H  | 0 | 4.577928  | -1.263577 | 1.186986  | H  | 0 | -1.992772 | -0.392368 | -3.740623 |
| H  | 0 | 4.630329  | -1.938195 | -0.443971 | H  | 0 | -1.602134 | -1.696144 | -2.611286 |
| H  | 0 | 5.441110  | -0.404073 | -0.093052 | H  | 0 | -3.218540 | -1.578899 | -3.295585 |
| H  | 0 | 3.431066  | -0.899897 | -2.355316 |    |   |           |           |           |
| H  | 0 | 2.579584  | 0.642496  | -2.200431 |    |   |           |           |           |
| H  | 0 | 4.326335  | 0.575950  | -1.996878 |    |   |           |           |           |

Energy + ZPE = -1158.872912

Free energy = -1158.923506

Free energy in DCM = -1159.258328

Free energy in heptane = -1159.260912

Number of imaginary frequencies = 0

**Product 21a+cpReX**

|   |   |          |           |          |
|---|---|----------|-----------|----------|
| C | 0 | 2.462224 | -1.341380 | 3.917963 |
| C | 0 | 2.569107 | 0.168126  | 4.065993 |
| C | 0 | 0.943094 | -1.533165 | 4.130696 |
| C | 0 | 1.438492 | 0.704206  | 3.582982 |

Energy + ZPE = -1158.873394

Free energy = -1158.924547

Free energy in DCM = -1159.258148

Free energy in heptane = -1159.260909

Number of imaginary frequencies = 0

**Product 21a+cpSiN**

|   |   |          |           |          |
|---|---|----------|-----------|----------|
| C | 0 | 2.002751 | -0.686912 | 4.807272 |
| C | 0 | 1.668777 | 0.775026  | 5.064176 |
| C | 0 | 0.583265 | -1.298592 | 4.833460 |
| C | 0 | 0.484767 | 1.028088  | 4.488053 |
| C | 0 | 0.009712 | -0.262691 | 3.838693 |
| C | 0 | 2.341032 | -0.797046 | 3.278046 |
| C | 0 | 0.967097 | -0.543625 | 2.581587 |

|    |   |           |           |           |   |   |           |           |           |
|----|---|-----------|-----------|-----------|---|---|-----------|-----------|-----------|
| B  | 0 | 0.796252  | 0.549931  | 1.468216  | C | 0 | 0.515208  | -0.658841 | -0.582487 |
| Cl | 0 | 2.090266  | 1.756312  | 1.183391  | C | 0 | 1.006628  | -1.455669 | 1.901513  |
| C  | 0 | -0.506372 | 0.639604  | 0.568090  | C | 0 | 1.582744  | -1.740331 | -0.833155 |
| C  | 0 | -0.180368 | 0.254852  | -0.942367 | C | 0 | 1.936805  | -2.416556 | 1.145670  |
| C  | 0 | -1.266830 | 2.012215  | 0.724701  | C | 0 | 0.774865  | 0.684599  | -1.262630 |
| C  | 0 | -0.924537 | 1.169133  | -1.933731 | C | 0 | 2.845513  | -1.673975 | 0.108123  |
| C  | 0 | -1.747353 | 2.605955  | -0.608045 | C | 0 | 1.146930  | -3.009422 | -0.048751 |
| C  | 0 | -0.439301 | -1.241521 | -1.111312 | I | 0 | 0.718081  | 0.601021  | -3.484521 |
| C  | 0 | -2.406779 | 1.529947  | -1.536241 | C | 0 | 3.967627  | -2.583443 | -0.427970 |
| C  | 0 | -0.543391 | 2.634748  | -1.583486 | C | 0 | 3.498153  | -0.341325 | 0.499625  |
| I  | 0 | 0.317052  | -2.081888 | -3.025843 | H | 0 | -0.592317 | 1.117977  | 3.609457  |
| C  | 0 | -3.145400 | 2.170881  | -2.726355 | H | 0 | -0.877879 | 3.749226  | 3.451736  |
| C  | 0 | -3.358523 | 0.494213  | -0.923359 | H | 0 | -2.893256 | 1.244633  | 4.928912  |
| H  | 0 | 2.752759  | -1.133682 | 5.464358  | H | 0 | -3.050943 | -0.022791 | 3.672246  |
| H  | 0 | 2.340633  | 1.492207  | 5.525087  | H | 0 | -3.472660 | 4.288490  | 3.222725  |
| H  | 0 | 0.111813  | -1.237189 | 5.819576  | H | 0 | -4.799178 | 1.983595  | 3.216959  |
| H  | 0 | 0.539651  | -2.330473 | 4.464271  | H | 0 | -1.239329 | 1.981229  | 1.091431  |
| H  | 0 | -0.005222 | 1.991689  | 4.387081  | H | 0 | 0.800278  | 0.571801  | 1.183191  |
| H  | 0 | -1.055178 | -0.328657 | 3.603476  | H | 0 | -3.570417 | 2.285666  | 0.817695  |
| H  | 0 | 2.717320  | -1.798464 | 3.039087  | H | 0 | -3.903051 | 0.621083  | 1.310507  |
| H  | 0 | 3.107460  | -0.076231 | 2.982913  | H | 0 | -0.417388 | -1.059977 | -0.999742 |
| H  | 0 | 0.597861  | -1.485980 | 2.145693  | H | 0 | 0.254559  | -2.065075 | 2.416795  |
| H  | 0 | -1.186548 | -0.136954 | 0.940382  | H | 0 | 1.562502  | -0.923690 | 2.683962  |
| H  | 0 | 0.887723  | 0.422681  | -1.128221 | H | 0 | 1.772793  | -1.842280 | -1.906853 |
| H  | 0 | -2.115262 | 1.861342  | 1.403871  | H | 0 | 2.426793  | -3.107218 | 1.843701  |
| H  | 0 | -0.619241 | 2.758874  | 1.200512  | H | 0 | 0.005527  | 1.420738  | -1.029223 |
| H  | 0 | -0.758161 | 0.828959  | -2.961588 | H | 0 | 1.756609  | 1.099146  | -1.040998 |
| H  | 0 | -2.304793 | 3.535620  | -0.436391 | H | 0 | 0.071209  | -3.155046 | 0.094781  |
| H  | 0 | 0.084269  | -1.836659 | -0.362869 | H | 0 | 1.574868  | -3.931949 | -0.445033 |
| H  | 0 | -1.496032 | -1.501972 | -1.110317 | H | 0 | 4.735412  | -2.736445 | 0.341193  |
| H  | 0 | 0.445658  | 2.796038  | -1.142128 | H | 0 | 3.614302  | -3.569850 | -0.740945 |
| H  | 0 | -0.671455 | 3.326972  | -2.417921 | H | 0 | 4.454886  | -2.118742 | -1.294368 |
| H  | 0 | -3.415974 | 1.405344  | -3.464516 | H | 0 | 3.958274  | 0.138031  | -0.374142 |
| H  | 0 | -4.074265 | 2.647319  | -2.387667 | H | 0 | 2.812944  | 0.377626  | 0.952491  |
| H  | 0 | -2.554671 | 2.931256  | -3.244519 | H | 0 | 4.302798  | -0.520742 | 1.224747  |
| H  | 0 | -3.603302 | -0.289096 | -1.652359 |   |   |           |           |           |
| H  | 0 | -2.971280 | 0.007332  | -0.026518 |   |   |           |           |           |
| H  | 0 | -4.304593 | 0.977163  | -0.645457 |   |   |           |           |           |

Energy + ZPE = -1158.873871

Free energy = -1158.925441

Free energy in DCM = -1159.259599

Free energy in heptane = -1159.262051

Number of imaginary frequencies = 0

Energy + ZPE = -1158.873849

Free energy = -1158.924945

Free energy in DCM = -1159.259430

Free energy in heptane = -1159.262267

Number of imaginary frequencies = 0

## Diels-Alder reaction with Vinylborane (22a)

### Product 21a+cpSiX

|    |   |           |           |          |
|----|---|-----------|-----------|----------|
| C  | 0 | -1.525265 | 1.537837  | 3.224533 |
| C  | 0 | -1.696851 | 3.039985  | 3.381098 |
| C  | 0 | -2.843736 | 1.037067  | 3.855526 |
| C  | 0 | -3.005170 | 3.309449  | 3.261121 |
| C  | 0 | -3.724872 | 1.992352  | 3.017934 |
| Cl | 0 | -2.296353 | -1.612082 | 1.252435 |
| B  | 0 | -1.226318 | -0.170268 | 1.292518 |
| C  | 0 | -1.810874 | 1.238748  | 1.664235 |
| C  | 0 | 0.311180  | -0.388152 | 0.975436 |
| C  | 0 | -3.341558 | 1.523877  | 1.569249 |

### TS 22a+cpReN

|   |   |           |           |          |
|---|---|-----------|-----------|----------|
| C | 0 | -2.550232 | -0.314699 | 2.183366 |
| C | 0 | -2.642771 | 1.066886  | 2.103442 |
| C | 0 | -3.941181 | -0.877216 | 2.075892 |
| C | 0 | -3.918973 | 1.414426  | 1.625558 |
| C | 0 | -4.636730 | 0.241045  | 1.318098 |
| H | 0 | -1.698684 | -0.872271 | 2.555435 |
| H | 0 | -1.834664 | 1.765372  | 2.288461 |
| H | 0 | -4.372033 | -0.914938 | 3.091224 |
| H | 0 | -4.024370 | -1.875819 | 1.645029 |
| H | 0 | -4.244512 | 2.423481  | 1.396895 |



|    |   |           |           |           |   |   |           |           |           |
|----|---|-----------|-----------|-----------|---|---|-----------|-----------|-----------|
| H  | 0 | -5.713656 | 0.245337  | 1.173000  | C | 0 | -0.188488 | 0.284876  | -1.246064 |
| Cl | 0 | -1.448258 | 1.716762  | -1.059013 | C | 0 | 3.823851  | -0.190030 | -1.302303 |
| B  | 0 | -1.368577 | -0.051616 | -0.635517 | C | 0 | -1.409180 | -0.307260 | -0.460377 |
| C  | 0 | -2.676345 | -0.785346 | -0.389690 | C | 0 | -0.441651 | 0.434817  | -2.802440 |
| C  | 0 | 0.037790  | -0.783648 | -0.702269 | C | 0 | -2.699807 | -0.298532 | -1.306781 |
| C  | 0 | -3.972945 | -0.262497 | -0.533481 | C | 0 | -1.913580 | 0.244059  | -3.200038 |
| C  | 0 | 1.283782  | 0.003634  | -0.168817 | C | 0 | -1.553063 | 0.384124  | 0.920823  |
| C  | 0 | 0.211463  | -1.326225 | -2.179852 | C | 0 | -2.899123 | 0.969777  | -2.222676 |
| C  | 0 | 2.528018  | -0.212609 | -1.054714 | C | 0 | -2.399755 | -1.101916 | -2.603997 |
| C  | 0 | 1.656134  | -1.233708 | -2.696690 | C | 0 | -2.533227 | -0.287657 | 1.860878  |
| C  | 0 | 1.516294  | -0.298027 | 1.334735  | C | 0 | -4.332174 | 1.015444  | -2.787225 |
| C  | 0 | 2.709005  | -1.673566 | -1.623204 | C | 0 | -2.568385 | 2.387370  | -1.737638 |
| C  | 0 | 2.143527  | 0.224223  | -2.496908 | C | 0 | -2.219319 | -1.517260 | 2.459749  |
| C  | 0 | 2.544171  | 0.593779  | 2.001477  | C | 0 | -3.774657 | 0.291359  | 2.154884  |
| C  | 0 | 4.111459  | -1.849994 | -2.236326 | C | 0 | -4.677312 | -0.335749 | 3.016633  |
| C  | 0 | 2.437719  | -2.919733 | -0.770106 | C | 0 | -3.116402 | -2.148206 | 3.320892  |
| C  | 0 | 2.264088  | 1.946418  | 2.248547  | C | 0 | -4.351173 | -1.558786 | 3.602902  |
| C  | 0 | 3.799154  | 0.100644  | 2.381835  | H | 0 | 2.440351  | 1.412577  | -1.219291 |
| C  | 0 | 4.746996  | 0.928760  | 2.987317  | H | 0 | -0.037668 | 1.304218  | -0.868996 |
| C  | 0 | 3.206176  | 2.778345  | 2.852545  | H | 0 | 4.570132  | 0.405682  | -1.821590 |
| C  | 0 | 4.453741  | 2.271720  | 3.224615  | H | 0 | 3.931729  | -1.261090 | -1.462623 |
| H  | 0 | -2.606158 | -1.854098 | -0.180419 | H | 0 | -1.209948 | -1.366368 | -0.252686 |
| H  | 0 | -0.066455 | -1.672782 | -0.067484 | H | 0 | -0.077765 | 1.418712  | -3.123536 |
| H  | 0 | -4.795349 | -0.952995 | -0.716284 | H | 0 | 0.143402  | -0.302578 | -3.369263 |
| H  | 0 | -4.090551 | 0.694904  | -1.032442 | H | 0 | -3.560837 | -0.607439 | -0.702839 |
| H  | 0 | 1.069952  | 1.078221  | -0.235023 | H | 0 | -2.048994 | 0.418819  | -4.275739 |
| H  | 0 | -0.148528 | -2.361997 | -2.217338 | H | 0 | -1.837622 | 1.433665  | 0.784741  |
| H  | 0 | -0.419033 | -0.762781 | -2.881415 | H | 0 | -0.560208 | 0.394749  | 1.393180  |
| H  | 0 | 3.412594  | 0.248848  | -0.600942 | H | 0 | -1.655970 | -1.902480 | -2.524117 |
| H  | 0 | 1.738087  | -1.679649 | -3.696928 | H | 0 | -3.291554 | -1.502228 | -3.090910 |
| H  | 0 | 1.804901  | -1.347383 | 1.464479  | H | 0 | -4.678867 | 0.052002  | -3.171054 |
| H  | 0 | 0.553112  | -0.177245 | 1.850821  | H | 0 | -5.039078 | 1.332078  | -2.009550 |
| H  | 0 | 1.388787  | 1.013313  | -2.586230 | H | 0 | -4.398262 | 1.741306  | -3.608187 |
| H  | 0 | 3.000530  | 0.488752  | -3.119997 | H | 0 | -3.268952 | 2.703488  | -0.953676 |
| H  | 0 | 4.415672  | -1.013405 | -2.871174 | H | 0 | -1.557787 | 2.500233  | -1.343043 |
| H  | 0 | 4.864555  | -1.951148 | -1.444230 | H | 0 | -2.676906 | 3.099313  | -2.566953 |
| H  | 0 | 4.151461  | -2.760807 | -2.847782 | H | 0 | -1.258867 | -1.983045 | 2.248347  |
| H  | 0 | 3.178348  | -3.008406 | 0.035489  | H | 0 | -4.035181 | 1.247388  | 1.705635  |
| H  | 0 | 1.447500  | -2.940769 | -0.313261 | H | 0 | -5.633988 | 0.134146  | 3.230949  |
| H  | 0 | 2.530719  | -3.822692 | -1.388541 | H | 0 | -2.850337 | -3.099313 | 3.775327  |
| H  | 0 | 1.295155  | 2.350939  | 1.962511  | H | 0 | -5.050605 | -2.047951 | 4.275739  |
| H  | 0 | 4.035076  | -0.946277 | 2.202985  | C | 0 | 4.736323  | -0.157080 | 0.533882  |
| H  | 0 | 5.713656  | 0.522406  | 3.274378  | C | 0 | 4.773583  | 1.215977  | 0.848270  |
| H  | 0 | 2.965842  | 3.822692  | 3.035650  | C | 0 | 3.568399  | -0.731274 | 1.312447  |
| H  | 0 | 5.188683  | 2.918233  | 3.696928  | C | 0 | 3.521659  | 1.606572  | 1.357326  |

Energy + ZPE = -1379.023033

Free energy = -1379.077754

Free energy in DCM = -1379.492596

Free energy in heptane = -1379.494386

Number of imaginary frequencies = 1 (-406.69)

#### TS 22a+cpReX

|    |   |          |           |           |
|----|---|----------|-----------|-----------|
| Cl | 0 | 1.251415 | -2.253720 | -0.994293 |
| B  | 0 | 1.215765 | -0.433057 | -1.074382 |
| C  | 0 | 2.529632 | 0.328622  | -1.136241 |

Energy + ZPE = -1379.022581

Free energy = -1379.077637

Free energy in DCM = -1379.491427

Free energy in heptane = -1379.493612

Number of imaginary frequencies = 1 (-408.80)

**TS 22a+cpSiN**

|    |   |           |           |           |
|----|---|-----------|-----------|-----------|
| Cl | 0 | 2.034971  | -1.757138 | -2.034696 |
| C  | 0 | 1.964765  | 0.964697  | -1.134156 |
| C  | 0 | 3.326741  | 0.960061  | -0.786746 |
| B  | 0 | 1.166767  | -0.185078 | -1.719964 |
| C  | 0 | -0.398406 | -0.145057 | -1.977957 |
| C  | 0 | -1.166498 | -0.960454 | -0.862132 |
| C  | 0 | -2.390101 | -1.702401 | -1.438201 |
| C  | 0 | -3.203776 | -0.915161 | -2.536827 |
| C  | 0 | -2.081213 | -1.401973 | -3.514862 |
| C  | 0 | -0.817597 | -0.529228 | -3.443039 |
| C  | 0 | -1.478901 | -0.048299 | 0.353448  |
| C  | 0 | -4.549959 | -1.609202 | -2.819407 |
| C  | 0 | -1.872109 | -2.621618 | -2.581319 |
| C  | 0 | -3.495356 | 0.586039  | -2.414748 |
| C  | 0 | -1.983799 | -0.786731 | 1.575944  |
| C  | 0 | -1.107405 | -1.553540 | 2.358779  |
| C  | 0 | -3.330961 | -0.730876 | 1.957088  |
| C  | 0 | -3.792470 | -1.419985 | 3.080771  |
| C  | 0 | -2.909111 | -2.180838 | 3.846824  |
| C  | 0 | -1.562323 | -2.244505 | 3.481411  |
| H  | 0 | 1.411012  | 1.876555  | -0.904993 |
| H  | 0 | 3.684661  | 1.700491  | -0.072379 |
| H  | 0 | 3.838953  | 0.004995  | -0.716553 |
| H  | 0 | -0.690528 | 0.902948  | -1.833990 |
| H  | 0 | -0.505163 | -1.754755 | -0.487628 |
| H  | 0 | -2.972974 | -2.166228 | -0.633852 |
| H  | 0 | -2.368363 | -1.586683 | -4.558633 |
| H  | 0 | -0.961868 | 0.394327  | -4.020157 |
| H  | 0 | -0.012196 | -1.082266 | -3.942408 |
| H  | 0 | -0.554333 | 0.484626  | 0.615836  |
| H  | 0 | -2.206422 | 0.718225  | 0.062921  |
| H  | 0 | -5.256839 | -1.420329 | -2.001259 |
| H  | 0 | -4.998799 | -1.215125 | -3.740590 |
| H  | 0 | -4.463770 | -2.693276 | -2.932952 |
| H  | 0 | -0.847287 | -2.995580 | -2.483399 |
| H  | 0 | -2.532953 | -3.462969 | -2.801422 |
| H  | 0 | -4.202257 | 0.779968  | -1.597396 |
| H  | 0 | -2.610375 | 1.198559  | -2.238552 |
| H  | 0 | -3.967799 | 0.950064  | -3.337167 |
| H  | 0 | -0.055097 | -1.603532 | 2.086235  |
| H  | 0 | -4.025727 | -0.135928 | 1.367957  |
| H  | 0 | -4.842088 | -1.359304 | 3.357615  |
| H  | 0 | -3.264747 | -2.716504 | 4.723095  |
| H  | 0 | -0.864133 | -2.829569 | 4.074858  |
| C  | 0 | 4.342550  | 1.770956  | -2.348404 |
| C  | 0 | 4.339577  | 0.745724  | -3.316104 |
| C  | 0 | 3.272210  | 2.755144  | -2.789058 |
| C  | 0 | 3.121731  | 0.771654  | -4.018409 |
| C  | 0 | 2.365188  | 1.845729  | -3.573135 |
| H  | 0 | 5.256839  | 2.104337  | -1.864971 |
| H  | 0 | 5.095195  | -0.026845 | -3.409248 |
| H  | 0 | 3.737663  | 3.462969  | -3.496437 |
| H  | 0 | 2.800784  | 3.340838  | -1.999010 |
| H  | 0 | 2.792080  | 0.017068  | -4.723095 |
| H  | 0 | 1.394877  | 2.138566  | -3.956820 |

Energy + ZPE = -1379.023709

Free energy = -1379.078927

Free energy in DCM = -1379.494735

Free energy in heptane = -1379.496142

Number of imaginary frequencies = 1 (-398.97)

**TS 22a+cpSiX**

|    |   |           |           |           |
|----|---|-----------|-----------|-----------|
| Cl | 0 | 2.336681  | -1.673276 | -2.089099 |
| C  | 0 | 2.013670  | 1.187604  | -2.275050 |
| C  | 0 | 3.385944  | 1.459613  | -2.389759 |
| B  | 0 | 1.326119  | -0.152337 | -2.087573 |
| C  | 0 | -0.225693 | -0.314726 | -1.800589 |
| C  | 0 | -0.491722 | -0.733637 | -0.300418 |
| C  | 0 | -1.674064 | -1.717381 | -0.183671 |
| C  | 0 | -2.891155 | -1.430454 | -1.145445 |
| C  | 0 | -2.020820 | -2.150567 | -2.230725 |
| C  | 0 | -0.965890 | -1.220674 | -2.852413 |
| C  | 0 | -0.609195 | 0.525192  | 0.598331  |
| C  | 0 | -4.115222 | -2.274545 | -0.741564 |
| C  | 0 | -1.341641 | -2.941594 | -1.083780 |
| C  | 0 | -3.401013 | -0.008340 | -1.412675 |
| C  | 0 | -0.622026 | 0.232403  | 2.084623  |
| C  | 0 | 0.549588  | -0.169690 | 2.743930  |
| C  | 0 | 0.546389  | -0.451296 | 4.109705  |
| C  | 0 | -0.633649 | -0.333813 | 4.848048  |
| C  | 0 | -1.805993 | 0.068562  | 4.207947  |
| C  | 0 | -1.796584 | 0.348374  | 2.839692  |
| H  | 0 | 1.363317  | 2.060744  | -2.210833 |
| H  | 0 | 3.763867  | 2.426197  | -2.066540 |
| H  | 0 | 4.087579  | 0.641584  | -2.238208 |
| H  | 0 | -0.646010 | 0.692852  | -1.908954 |
| H  | 0 | 0.379011  | -1.293823 | 0.068718  |
| H  | 0 | -1.914631 | -1.907334 | 0.868796  |
| H  | 0 | -2.551418 | -2.712975 | -3.010547 |
| H  | 0 | -0.250192 | -1.856361 | -3.389426 |
| H  | 0 | -1.430601 | -0.571561 | -3.606952 |
| H  | 0 | 0.244494  | 1.178840  | 0.370093  |
| H  | 0 | -1.509690 | 1.088961  | 0.329288  |
| H  | 0 | -4.868338 | -2.264244 | -1.540241 |
| H  | 0 | -3.871802 | -3.319846 | -0.532639 |
| H  | 0 | -4.584860 | -1.860381 | 0.159900  |
| H  | 0 | -0.280783 | -3.181039 | -1.213777 |
| H  | 0 | -1.874237 | -3.852170 | -0.801132 |
| H  | 0 | -3.862863 | 0.415158  | -0.511225 |
| H  | 0 | -2.629500 | 0.686683  | -1.746128 |
| H  | 0 | -4.178673 | -0.030960 | -2.188097 |
| H  | 0 | 1.475565  | -0.257531 | 2.179180  |
| H  | 0 | 1.467025  | -0.758390 | 4.599654  |
| H  | 0 | -0.637234 | -0.550581 | 5.913056  |
| H  | 0 | -2.729747 | 0.167531  | 4.772647  |
| H  | 0 | -2.714362 | 0.666091  | 2.349268  |
| C  | 0 | 1.615515  | 1.002488  | -4.854450 |
| C  | 0 | 1.667917  | 2.386350  | -4.967431 |
| C  | 0 | 3.023020  | 0.483210  | -4.863694 |
| C  | 0 | 2.988837  | 2.816601  | -4.746641 |
| C  | 0 | 3.782383  | 1.707647  | -4.390967 |

|   |   |          |           |           |
|---|---|----------|-----------|-----------|
| H | 0 | 0.740224 | 0.387181  | -5.026901 |
| H | 0 | 0.814539 | 3.037719  | -5.124491 |
| H | 0 | 3.310742 | 0.297725  | -5.913056 |
| H | 0 | 3.194692 | -0.436607 | -4.305090 |
| H | 0 | 3.312449 | 3.852170  | -4.719510 |
| H | 0 | 4.868338 | 1.741955  | -4.388714 |

Energy + ZPE = -1379.023454  
Free energy = -1379.078439  
Free energy in DCM = -1379.493399  
Free energy in heptane = -1379.495331  
Number of imaginary frequencies = 1 (-402.92)

**Product 22a+cpReN**

|    |   |           |           |           |
|----|---|-----------|-----------|-----------|
| C  | 0 | -3.425639 | -0.335220 | 0.923807  |
| C  | 0 | -3.628479 | 1.166890  | 0.798797  |
| C  | 0 | -4.897484 | -0.809151 | 0.944749  |
| C  | 0 | -2.990851 | -0.886905 | -0.518432 |
| C  | 0 | -4.730909 | 1.363229  | 0.061831  |
| C  | 0 | -5.279123 | -0.004015 | -0.318025 |
| B  | 0 | -1.580947 | -0.344216 | -0.956471 |
| C  | 0 | -4.273579 | -0.605813 | -1.363722 |
| Cl | 0 | -1.463649 | 0.974479  | -2.167506 |
| C  | 0 | -0.256810 | -0.990884 | -0.390422 |
| C  | 0 | 0.988076  | -0.065757 | -0.176145 |
| C  | 0 | 0.023284  | -2.252295 | -1.314820 |
| C  | 0 | 2.296327  | -0.752521 | -0.618955 |
| C  | 0 | 1.519718  | -2.474991 | -1.584168 |
| C  | 0 | 1.008808  | 0.477777  | 1.277339  |
| C  | 0 | 2.394523  | -2.293552 | -0.296968 |
| C  | 0 | 2.119313  | -1.146924 | -2.112723 |
| C  | 0 | 2.034330  | 1.565776  | 1.521873  |
| C  | 0 | 3.832930  | -2.803675 | -0.509316 |
| C  | 0 | 1.907131  | -2.881431 | 1.033548  |
| C  | 0 | 1.839985  | 2.857693  | 1.010006  |
| C  | 0 | 3.201438  | 1.314690  | 2.255084  |
| C  | 0 | 4.148969  | 2.318097  | 2.468950  |
| C  | 0 | 2.782605  | 3.863598  | 1.220220  |
| C  | 0 | 3.942755  | 3.596944  | 1.951216  |
| H  | 0 | -2.778195 | -0.674291 | 1.735897  |
| H  | 0 | -2.929353 | 1.920232  | 1.148942  |
| H  | 0 | -5.432624 | -0.475342 | 1.839604  |
| H  | 0 | -5.008918 | -1.894087 | 0.828348  |
| H  | 0 | -2.874427 | -1.973733 | -0.385467 |
| H  | 0 | -5.109273 | 2.308815  | -0.313701 |
| H  | 0 | -6.324692 | -0.034250 | -0.634425 |
| H  | 0 | -4.670585 | -1.536372 | -1.785977 |
| H  | 0 | -4.095105 | 0.084528  | -2.191855 |
| H  | 0 | -0.520738 | -1.401209 | 0.592317  |
| H  | 0 | 0.889200  | 0.811157  | -0.828683 |
| H  | 0 | -0.423032 | -3.136992 | -0.844722 |
| H  | 0 | -0.468401 | -2.149225 | -2.293244 |
| H  | 0 | 3.164729  | -0.139638 | -0.352655 |
| H  | 0 | 1.670271  | -3.388627 | -2.174167 |
| H  | 0 | 1.175290  | -0.346647 | 1.980212  |
| H  | 0 | 0.008074  | 0.875344  | 1.501345  |

|   |   |          |           |           |
|---|---|----------|-----------|-----------|
| H | 0 | 1.459239 | -0.510675 | -2.712925 |
| H | 0 | 3.061484 | -1.275457 | -2.649652 |
| H | 0 | 4.289832 | -2.442547 | -1.434713 |
| H | 0 | 4.476303 | -2.483787 | 0.320243  |
| H | 0 | 3.851893 | -3.900870 | -0.537150 |
| H | 0 | 2.539062 | -2.539064 | 1.863100  |
| H | 0 | 0.874567 | -2.632402 | 1.281161  |
| H | 0 | 1.981323 | -3.976755 | 1.006790  |
| H | 0 | 0.937022 | 3.077199  | 0.443755  |
| H | 0 | 3.367508 | 0.321601  | 2.667242  |
| H | 0 | 5.046034 | 2.099713  | 3.042891  |
| H | 0 | 2.609505 | 4.858219  | 0.817037  |
| H | 0 | 4.676868 | 4.380747  | 2.118070  |

Energy + ZPE = -1379.066402  
Free energy = -1379.120376  
Free energy in DCM = -1379.538867  
Free energy in heptane = -1379.541766  
Number of imaginary frequencies = 0

**Product 22a+cpReX**

|    |   |           |           |           |
|----|---|-----------|-----------|-----------|
| C  | 0 | 3.348680  | 0.994058  | 3.949037  |
| C  | 0 | 3.313954  | 2.513200  | 3.897145  |
| C  | 0 | 1.835117  | 0.684971  | 4.003913  |
| C  | 0 | 3.679044  | 0.493874  | 2.498029  |
| C  | 0 | 2.218139  | 2.869431  | 3.211190  |
| C  | 0 | 1.504062  | 1.592473  | 2.798281  |
| C  | 0 | 2.439045  | 0.938793  | 1.660214  |
| B  | 0 | 1.616215  | -0.110179 | 0.825448  |
| Cl | 0 | 1.607588  | -1.841832 | 1.311862  |
| C  | 0 | 0.822968  | 0.328925  | -0.465210 |
| C  | 0 | -0.509890 | -0.416895 | -0.811936 |
| C  | 0 | 1.901861  | 0.314644  | -1.632307 |
| C  | 0 | -0.617697 | -0.729814 | -2.318038 |
| C  | 0 | 1.333496  | -0.201562 | -2.963197 |
| C  | 0 | -1.725020 | 0.350503  | -0.226430 |
| C  | 0 | -0.079235 | 0.396159  | -3.282519 |
| C  | 0 | 0.638803  | -1.561944 | -2.700370 |
| C  | 0 | -3.032850 | -0.411513 | -0.292282 |
| C  | 0 | -0.500473 | 0.116842  | -4.737862 |
| C  | 0 | -0.340216 | 1.885007  | -3.020362 |
| C  | 0 | -3.267693 | -1.500068 | 0.561335  |
| C  | 0 | -4.035789 | -0.059328 | -1.204896 |
| C  | 0 | -5.235139 | -0.772030 | -1.269040 |
| C  | 0 | -4.463106 | -2.215562 | 0.501666  |
| C  | 0 | -5.452615 | -1.853932 | -0.415683 |
| H  | 0 | 3.977215  | 0.550465  | 4.725187  |
| H  | 0 | 4.105647  | 3.164899  | 4.253955  |
| H  | 0 | 1.363388  | 1.035796  | 4.927130  |
| H  | 0 | 1.597575  | -0.371860 | 3.843913  |
| H  | 0 | 4.608390  | 0.927369  | 2.115563  |
| H  | 0 | 3.794746  | -0.594496 | 2.499972  |
| H  | 0 | 1.934749  | 3.866050  | 2.886516  |
| H  | 0 | 0.451258  | 1.698862  | 2.523405  |
| H  | 0 | 2.711455  | 1.746326  | 0.968476  |
| H  | 0 | 0.569090  | 1.385637  | -0.313103 |

|   |   |           |           |           |   |   |           |           |           |
|---|---|-----------|-----------|-----------|---|---|-----------|-----------|-----------|
| H | 0 | -0.501231 | -1.396046 | -0.316350 | H | 0 | 1.891398  | -2.501478 | 3.401644  |
| H | 0 | 2.306559  | 1.327111  | -1.748578 | H | 0 | 2.827864  | -1.019208 | 3.188377  |
| H | 0 | 2.759633  | -0.325388 | -1.378070 | H | 0 | 0.478292  | 2.090135  | 4.102261  |
| H | 0 | -1.600777 | -1.150808 | -2.556525 | H | 0 | -1.222692 | 0.132108  | 3.494688  |
| H | 0 | 2.096060  | -0.146866 | -3.751213 | H | 0 | 0.042598  | -1.644230 | 2.289768  |
| H | 0 | -1.836862 | 1.314976  | -0.734823 | H | 0 | -1.175513 | 0.124764  | 0.887311  |
| H | 0 | -1.501134 | 0.581302  | 0.825438  | H | 0 | 0.944149  | -0.018542 | -1.207123 |
| H | 0 | 1.067395  | -2.192694 | -1.913575 | H | 0 | -1.328341 | 2.321779  | 1.384550  |
| H | 0 | 0.509515  | -2.167650 | -3.599772 | H | 0 | 0.371915  | 2.658182  | 1.102027  |
| H | 0 | -0.356548 | -0.924203 | -5.039745 | H | 0 | -0.552373 | 0.860544  | -3.008593 |
| H | 0 | -1.562257 | 0.355506  | -4.879552 | H | 0 | -1.032590 | 3.942787  | -0.483494 |
| H | 0 | 0.074089  | 0.744608  | -5.431172 | H | 0 | -0.482763 | -1.901829 | -0.403809 |
| H | 0 | -1.404968 | 2.120170  | -3.145769 | H | 0 | -1.902888 | -1.110076 | -1.064664 |
| H | 0 | -0.043051 | 2.222054  | -2.026414 | H | 0 | 1.294288  | 2.336312  | -1.265124 |
| H | 0 | 0.209352  | 2.494321  | -3.750248 | H | 0 | 0.369977  | 3.200549  | -2.512675 |
| H | 0 | -2.505455 | -1.786001 | 1.283324  | H | 0 | -2.874854 | 2.290977  | -3.449104 |
| H | 0 | -3.876370 | 0.786483  | -1.870380 | H | 0 | -3.060983 | 3.680026  | -2.367642 |
| H | 0 | -5.999566 | -0.478750 | -1.984206 | H | 0 | -1.556765 | 3.451358  | -3.266100 |
| H | 0 | -4.624827 | -3.053497 | 1.175087  | H | 0 | -3.575707 | 0.778980  | -1.611668 |
| H | 0 | -6.385825 | -2.409043 | -0.461433 | H | 0 | -2.820475 | 0.821028  | -0.015747 |

Energy + ZPE = -1379.066823

Free energy = -1379.121155

Free energy in DCM = -1379.539289

Free energy in heptane = -1379.542491

Number of imaginary frequencies = 0

|   |   |           |           |           |
|---|---|-----------|-----------|-----------|
| H | 0 | -3.763967 | 2.198111  | -0.582014 |
| H | 0 | 1.486705  | -2.405923 | -2.062760 |
| H | 0 | -2.514614 | -1.506188 | -3.337500 |
| H | 0 | -2.053499 | -2.550804 | -5.532126 |
| H | 0 | 1.953333  | -3.449872 | -4.252983 |
| H | 0 | 0.186088  | -3.528266 | -6.003864 |

#### Product 22a+cpSiN

|    |   |           |           |           |
|----|---|-----------|-----------|-----------|
| C  | 0 | 1.507393  | -1.003003 | 4.972125  |
| C  | 0 | 1.646810  | 0.510712  | 5.041528  |
| C  | 0 | -0.032728 | -1.133775 | 4.949351  |
| C  | 0 | 1.855277  | -1.409979 | 3.497025  |
| C  | 0 | 0.630711  | 1.043587  | 4.348161  |
| C  | 0 | -0.203220 | -0.107618 | 3.805562  |
| C  | 0 | 0.670715  | -0.820614 | 2.668003  |
| B  | 0 | 0.911758  | 0.120437  | 1.432205  |
| Cl | 0 | 2.573109  | 0.678457  | 1.037564  |
| C  | 0 | -0.272068 | 0.616022  | 0.506403  |
| C  | 0 | -0.120914 | 0.144990  | -0.993393 |
| C  | 0 | -0.510227 | 2.168696  | 0.669437  |
| C  | 0 | -0.560287 | 1.243817  | -1.981952 |
| C  | 0 | -0.818410 | 2.880238  | -0.657825 |
| C  | 0 | -0.821667 | -1.223913 | -1.200704 |
| C  | 0 | -1.826659 | 2.078559  | -1.548616 |
| C  | 0 | 0.292210  | 2.507604  | -1.672545 |
| C  | 0 | -0.546580 | -1.870410 | -2.543167 |
| C  | 0 | -2.348259 | 2.925734  | -2.725128 |
| C  | 0 | -3.050772 | 1.423950  | -0.895158 |
| C  | 0 | 0.709301  | -2.429374 | -2.823862 |
| C  | 0 | -1.531363 | -1.926434 | -3.538050 |
| C  | 0 | -1.272597 | -2.517373 | -4.776630 |
| C  | 0 | 0.973899  | -3.020106 | -4.058999 |
| C  | 0 | -0.017618 | -3.065674 | -5.041843 |
| H  | 0 | 2.046960  | -1.572949 | 5.732507  |
| H  | 0 | 2.493352  | 1.035640  | 5.473006  |
| H  | 0 | -0.501859 | -0.804422 | 5.882152  |
| H  | 0 | -0.386362 | -2.139272 | 4.690730  |

Energy + ZPE = -1379.065829

Free energy = -1379.118593

Free energy in DCM = -1379.539067

Free energy in heptane = -1379.541865

Number of imaginary frequencies = 0

#### Product 22a+cpSiX

|    |   |           |           |           |
|----|---|-----------|-----------|-----------|
| C  | 0 | -2.283110 | 2.254350  | 2.189029  |
| C  | 0 | -2.192613 | 3.771487  | 2.186959  |
| C  | 0 | -3.816156 | 2.064798  | 2.201596  |
| C  | 0 | -1.940043 | 1.808545  | 0.676103  |
| C  | 0 | -3.243865 | 4.236528  | 1.496511  |
| C  | 0 | -4.047471 | 3.036305  | 1.021662  |
| C  | 0 | -3.195495 | 2.328231  | -0.090807 |
| B  | 0 | -1.551342 | 0.286088  | 0.657745  |
| Cl | 0 | -2.794431 | -0.954885 | 0.261398  |
| C  | 0 | -0.095523 | -0.220280 | 1.011863  |
| C  | 0 | 0.640285  | -0.751133 | -0.288302 |
| C  | 0 | -0.057469 | -1.226402 | 2.223277  |
| C  | 0 | 1.502501  | -1.991812 | 0.019720  |
| C  | 0 | 0.905153  | -2.405531 | 2.011817  |
| C  | 0 | 1.405228  | 0.401498  | -0.992440 |
| C  | 0 | 2.273429  | -1.956620 | 1.395071  |
| C  | 0 | 0.567589  | -3.062616 | 0.649276  |
| C  | 0 | 1.941178  | 0.043613  | -2.363836 |
| C  | 0 | 3.326354  | -3.079780 | 1.455617  |
| C  | 0 | 2.950488  | -0.683562 | 1.919668  |
| C  | 0 | 1.076536  | -0.057417 | -3.464107 |
| C  | 0 | 3.304916  | -0.202126 | -2.571073 |

|   |   |           |           |           |
|---|---|-----------|-----------|-----------|
| C | 0 | 1.557271  | -0.398173 | -4.728065 |
| C | 0 | 3.792340  | -0.543251 | -3.834433 |
| C | 0 | 2.919183  | -0.643415 | -4.917891 |
| H | 0 | -1.706300 | 1.739335  | 2.961480  |
| H | 0 | -1.351997 | 4.338423  | 2.575394  |
| H | 0 | -4.268304 | 2.415159  | 3.134683  |
| H | 0 | -4.139196 | 1.039102  | 1.994403  |
| H | 0 | -1.043152 | 2.366450  | 0.377659  |
| H | 0 | -3.438987 | 5.266194  | 1.212824  |
| H | 0 | -5.082707 | 3.231106  | 0.731038  |
| H | 0 | -2.925969 | 3.014787  | -0.899427 |
| H | 0 | -3.769306 | 1.505844  | -0.529069 |
| H | 0 | 0.463117  | 0.669905  | 1.325733  |
| H | 0 | -0.113921 | -1.102694 | -1.006889 |
| H | 0 | -1.052843 | -1.646571 | 2.412143  |
| H | 0 | 0.217595  | -0.668790 | 3.127916  |
| H | 0 | 2.085238  | -2.278644 | -0.863004 |
| H | 0 | 0.938491  | -3.042136 | 2.905572  |
| H | 0 | 0.720668  | 1.255543  | -1.091310 |
| H | 0 | 2.228522  | 0.740528  | -0.354142 |
| H | 0 | -0.482632 | -3.042264 | 0.339006  |
| H | 0 | 0.941908  | -4.083608 | 0.548878  |
| H | 0 | 3.680177  | -3.219009 | 2.485307  |
| H | 0 | 2.952687  | -4.044761 | 1.102519  |
| H | 0 | 4.197144  | -2.820189 | 0.840031  |
| H | 0 | 3.812440  | -0.415361 | 1.295128  |
| H | 0 | 2.293065  | 0.185606  | 1.966972  |
| H | 0 | 3.333836  | -0.857889 | 2.933873  |
| H | 0 | 0.014698  | 0.139217  | -3.329047 |
| H | 0 | 3.993519  | -0.121016 | -1.732755 |
| H | 0 | 0.869191  | -0.467347 | -5.566800 |
| H | 0 | 4.854946  | -0.727440 | -3.971108 |
| H | 0 | 3.295872  | -0.906296 | -5.902797 |

Energy + ZPE = -1379.065833

Free energy = -1379.120350

Free energy in DCM = -1379.538560

Free energy in heptane = -1379.541748

Number of imaginary frequencies = 0
